# Supplementary material for: 20-nor-Isopimarane and isopimarane diterpenoids produced by Aspergillus sp. WT03
Source: Royal Society of Chemistry journal article supplement (doi:10.1039/d3ob00005b), 2023-01-01
Supplement: d3ob00005b1.pdf [file d3ob00005b1.pdf]

## Supplementary Information

### **20-nor-Isopimarane and isopimarane diterpenoids produced by *Aspergillus* sp. WT03**

Qiaoqiao Tao,<sup>a</sup> Yining Sang,<sup>a</sup> Tao Han,<sup>a</sup> Hongling Zhou,<sup>a</sup> Peng Zhang,<sup>\*a</sup> and Xiaofeng Cai<sup>\*a,b</sup>

*<sup>a</sup>School of Pharmacy, Tongji Medical College of Huazhong University of Science and Technology, Hubei Key Laboratory of Natural Medicinal Chemistry and Resource Evaluation, Wuhan 430030, People's Republic of China.*

*<sup>b</sup>State Key Laboratory of Dao-di Herbs, Beijing 100700, P. R. China.*

\*Corresponding authors:

E-mail: [zhangpeng@hust.edu.cn](mailto:zhangpeng@hust.edu.cn), [caixiaofeng@hust.edu.cn](mailto:caixiaofeng@hust.edu.cn)

## Contents

|                                                                                                                                  |    |
|----------------------------------------------------------------------------------------------------------------------------------|----|
| <b>Table S1</b> Energy analysis of <b>2a/2b</b> at B3LYP/6-311G* level in methanol.....                                          | 4  |
| <b>Table S2</b> Cartesian coordinates of low-energy conformers of <b>2a/2b</b> optimized at B3LYP/6-311G* level in methanol..... | 4  |
| <b>Table S3</b> Energy analysis of <b>4a/4b</b> at B3LYP/6-311G* level in methanol.....                                          | 5  |
| <b>Table S4</b> Cartesian coordinates of low-energy conformers of <b>4a/4b</b> optimized at B3LYP/6-311G* level in methanol..... | 6  |
| <b>Fig. S1</b> Cell viability of cancer cells.....                                                                               | 7  |
| <b>Fig. S2</b> The morphology and quantity changes of compounds-incubated MCF-7 cells.....                                       | 8  |
| <b>Fig. S3</b> The morphology and quantity changes of compounds-incubated A549 cells.....                                        | 8  |
| <b>Fig. S4</b> The morphology and quantity changes of compounds-incubated HT-29 cells.....                                       | 9  |
| <b>Fig. S5</b> <sup>1</sup> H-NMR (600 MHz, CD <sub>3</sub> OD) spectrum of compound <b>1</b> .....                              | 10 |
| <b>Fig. S6</b> <sup>13</sup> C-NMR (150 MHz, CD <sub>3</sub> OD) spectrum of compound <b>1</b> .....                             | 11 |
| <b>Fig. S7</b> DEPT-135 (150 MHz, CD <sub>3</sub> OD) spectrum of compound <b>1</b> .....                                        | 12 |
| <b>Fig. S8</b> HSQC spectrum (CD <sub>3</sub> OD) of compound <b>1</b> .....                                                     | 13 |
| <b>Fig. S9</b> <sup>1</sup> H- <sup>1</sup> H COSY spectrum (CD <sub>3</sub> OD) of compound <b>1</b> .....                      | 14 |
| <b>Fig. S10</b> HMBC spectrum (CD <sub>3</sub> OD) of compound <b>1</b> .....                                                    | 15 |
| <b>Fig. S11</b> NOESY spectrum (CD <sub>3</sub> OD) of compound <b>1</b> .....                                                   | 16 |
| <b>Fig. S12</b> HRTOFMS spectrum of compound <b>1</b> .....                                                                      | 17 |
| <b>Fig. S13</b> IR spectrum of compound <b>1</b> .....                                                                           | 18 |
| <b>Fig. S14</b> UV spectrum of compound <b>1</b> .....                                                                           | 19 |
| <b>Fig. S15</b> CD spectrum of compound <b>1</b> .....                                                                           | 20 |
| <b>Fig. S16</b> <sup>1</sup> H-NMR (600 MHz, CDCl <sub>3</sub> ) spectrum of compound <b>2</b> .....                             | 21 |
| <b>Fig. S17</b> <sup>13</sup> C-NMR (150 MHz, CDCl <sub>3</sub> ) spectrum of compound <b>2</b> .....                            | 22 |
| <b>Fig. S18</b> DEPT-135 (150 MHz, CDCl <sub>3</sub> ) spectrum of compound <b>2</b> .....                                       | 23 |
| <b>Fig. S19</b> HSQC spectrum (CDCl <sub>3</sub> ) of compound <b>2</b> .....                                                    | 24 |
| <b>Fig. S20</b> <sup>1</sup> H- <sup>1</sup> H COSY spectrum (CDCl <sub>3</sub> ) of compound <b>2</b> .....                     | 25 |
| <b>Fig. S21</b> HMBC spectrum (CDCl <sub>3</sub> ) of compound <b>2</b> .....                                                    | 26 |
| <b>Fig. S22</b> NOESY spectrum (CDCl <sub>3</sub> ) of compound <b>2</b> .....                                                   | 27 |
| <b>Fig. S23</b> HRTOFMS spectrum of compound <b>2</b> .....                                                                      | 28 |
| <b>Fig. S24</b> IR spectrum of compound <b>2</b> .....                                                                           | 29 |
| <b>Fig. S25</b> UV spectrum of compound <b>2</b> .....                                                                           | 30 |
| <b>Fig. S26</b> CD spectrum of compound <b>2</b> .....                                                                           | 31 |
| <b>Fig. S27</b> <sup>1</sup> H-NMR (600 MHz, CD <sub>3</sub> OD) spectrum of compound <b>3</b> .....                             | 32 |
| <b>Fig. S28</b> <sup>13</sup> C-NMR (150 MHz, CD <sub>3</sub> OD) spectrum of compound <b>3</b> .....                            | 33 |
| <b>Fig. S29</b> DEPT-135 (150 MHz, CD <sub>3</sub> OD) spectrum of compound <b>3</b> .....                                       | 34 |
| <b>Fig. S30</b> HSQC spectrum (CD <sub>3</sub> OD) of compound <b>3</b> .....                                                    | 35 |
| <b>Fig. S31</b> <sup>1</sup> H- <sup>1</sup> H COSY spectrum (CD <sub>3</sub> OD) of compound <b>3</b> .....                     | 36 |
| <b>Fig. S32</b> HMBC spectrum (CD <sub>3</sub> OD) of compound <b>3</b> .....                                                    | 37 |
| <b>Fig. S33</b> NOESY spectrum (CD <sub>3</sub> OD) of compound <b>3</b> .....                                                   | 38 |
| <b>Fig. S34</b> HRTOFMS spectrum of compound <b>3</b> .....                                                                      | 39 |
| <b>Fig. S35</b> IR spectrum of compound <b>3</b> .....                                                                           | 40 |

|                                                                                                                 |    |
|-----------------------------------------------------------------------------------------------------------------|----|
| <b>Fig. S36</b> UV spectrum of compound <b>3</b> .....                                                          | 41 |
| <b>Fig. S37</b> CD spectrum of compound <b>3</b> .....                                                          | 42 |
| <b>Fig. S38</b> $^1\text{H}$ -NMR (600 MHz, $\text{CD}_3\text{OD}$ ) spectrum of compound <b>4</b> .....        | 43 |
| <b>Fig. S39</b> $^{13}\text{C}$ -NMR (150 MHz, $\text{CD}_3\text{OD}$ ) spectrum of compound <b>4</b> .....     | 44 |
| <b>Fig. S40</b> DEPT-135 (150 MHz, $\text{CD}_3\text{OD}$ ) spectrum of compound <b>4</b> .....                 | 45 |
| <b>Fig. S41</b> HSQC spectrum ( $\text{CD}_3\text{OD}$ ) of compound <b>4</b> .....                             | 46 |
| <b>Fig. S42</b> $^1\text{H}$ - $^1\text{H}$ COSY spectrum ( $\text{CD}_3\text{OD}$ ) of compound <b>4</b> ..... | 47 |
| <b>Fig. S43</b> HMBC spectrum ( $\text{CD}_3\text{OD}$ ) of compound <b>4</b> .....                             | 48 |
| <b>Fig. S44</b> NOESY spectrum ( $\text{CD}_3\text{OD}$ ) of compound <b>4</b> .....                            | 49 |
| <b>Fig. S45</b> HRTOFMS spectrum of compound <b>4</b> .....                                                     | 50 |
| <b>Fig. S46</b> IR spectrum of compound <b>4</b> .....                                                          | 51 |
| <b>Fig. S47</b> UV spectrum of compound <b>4</b> .....                                                          | 52 |
| <b>Fig. S48</b> CD spectrum of compound <b>4</b> .....                                                          | 53 |
| <b>Fig. S49</b> $^1\text{H}$ -NMR (600 MHz, $\text{CD}_3\text{OD}$ ) spectrum of compound <b>5</b> .....        | 54 |
| <b>Fig. S50</b> $^{13}\text{C}$ -NMR (150 MHz, $\text{CD}_3\text{OD}$ ) spectrum of compound <b>5</b> .....     | 55 |
| <b>Fig. S51</b> DEPT-135 (150 MHz, $\text{CD}_3\text{OD}$ ) spectrum of compound <b>5</b> .....                 | 56 |
| <b>Fig. S52</b> HSQC spectrum ( $\text{CD}_3\text{OD}$ ) of compound <b>5</b> .....                             | 57 |
| <b>Fig. S53</b> $^1\text{H}$ - $^1\text{H}$ COSY spectrum ( $\text{CD}_3\text{OD}$ ) of compound <b>5</b> ..... | 58 |
| <b>Fig. S54</b> HMBC spectrum ( $\text{CD}_3\text{OD}$ ) of compound <b>5</b> .....                             | 59 |
| <b>Fig. S55</b> NOESY spectrum ( $\text{CD}_3\text{OD}$ ) of compound <b>5</b> .....                            | 60 |
| <b>Fig. S56</b> HRTOFMS spectrum of compound <b>5</b> .....                                                     | 61 |
| <b>Fig. S57</b> IR spectrum of compound <b>5</b> .....                                                          | 62 |
| <b>Fig. S58</b> UV spectrum of compound <b>5</b> .....                                                          | 63 |
| <b>Fig. S59</b> CD spectrum of compound <b>5</b> .....                                                          | 64 |

**Table S1** Energy analysis of **2a/2b** at B3LYP/6-311G\* level in methanol

| Configuration      | Conformer                                                                         | E (Hartree) | Boltzmann distribution |
|--------------------|-----------------------------------------------------------------------------------|-------------|------------------------|
| 13R,14S- <b>2a</b> | 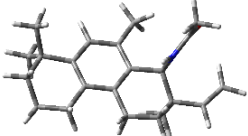 | -987.046414 | 100%                   |
| 13S,14R- <b>2b</b> |  | -987.045641 | 100%                   |

**Table S2** Cartesian coordinates of low-energy conformers of **2a/2b** optimized at B3LYP/6-311G\* level in methanol

| Atom | Conformer 13R,14S- <b>2a</b> |           |           | Conformer 13S,14R- <b>2b</b> |           |           |
|------|------------------------------|-----------|-----------|------------------------------|-----------|-----------|
|      | X                            | Y         | Z         | X                            | Y         | Z         |
| C    | 4.150623                     | -1.752824 | -0.601047 | 4.143683                     | -1.75831  | 0.54898   |
| C    | 4.624287                     | -0.329831 | -0.870221 | 4.7773                       | -0.530193 | -0.093273 |
| C    | 3.93163                      | 0.710893  | 0.037565  | 3.9594                       | 0.759361  | 0.143417  |
| C    | 2.41996                      | 0.4311    | 0.142453  | 2.454457                     | 0.500726  | -0.058431 |
| C    | 1.824363                     | -0.7539   | -0.312089 | 1.898477                     | -0.782761 | -0.148194 |
| C    | 2.658401                     | -1.876159 | -0.906417 | 2.771606                     | -2.023685 | -0.069345 |
| C    | 1.600252                     | 1.393486  | 0.745221  | 1.588001                     | 1.592065  | -0.163494 |
| C    | 0.224999                     | 1.252668  | 0.870009  | 0.211255                     | 1.472415  | -0.313641 |
| C    | -0.380119                    | 0.08885   | 0.350943  | -0.357475                    | 0.177795  | -0.354263 |
| C    | 0.418885                     | -0.912182 | -0.219026 | 0.503959                     | -0.934246 | -0.339954 |
| C    | -1.906198                    | -0.029003 | 0.350208  | -1.884122                    | 0.016758  | -0.476739 |
| C    | -2.385131                    | -1.505736 | 0.440809  | -2.409613                    | -1.454565 | -0.337603 |
| C    | -1.724189                    | -2.270953 | -0.723126 | -1.451018                    | -2.352121 | -1.144298 |
| C    | -0.193061                    | -2.224402 | -0.685412 | -0.029897                    | -2.333389 | -0.592871 |
| C    | -0.563479                    | 2.329838  | 1.580996  | -0.583202                    | 2.750896  | -0.477617 |
| C    | 4.189146                     | 2.104845  | -0.574979 | 4.480711                     | 1.824137  | -0.845609 |
| C    | 4.560438                     | 0.672582  | 1.450014  | 4.194411                     | 1.271435  | 1.583694  |
| N    | -2.412588                    | 0.654671  | -0.851272 | -2.603366                    | 0.880486  | 0.459769  |
| C    | -3.251603                    | 1.728016  | -0.842116 | -3.591936                    | 1.742794  | 0.083225  |
| C    | -3.591443                    | 2.29929   | -2.209656 | -4.293429                    | 2.465067  | 1.222513  |
| O    | -3.728384                    | 2.20374   | 0.179143  | -3.884584                    | 1.957708  | -1.083018 |
| C    | -3.89117                     | -1.685267 | 0.356527  | -2.38311                     | -1.8693   | 1.123439  |
| C    | -4.85398                     | -0.814496 | 0.644862  | -3.400507                    | -2.315809 | 1.856824  |
| C    | -1.946869                    | -2.097672 | 1.802914  | -3.816735                    | -1.552375 | -0.940642 |
| H    | 4.714052                     | -2.467441 | -1.209822 | 4.786027                     | -2.635002 | 0.416308  |
| H    | 4.338603                     | -2.02541  | 0.443279  | 4.042394                     | -1.613311 | 1.630178  |
| H    | 4.417391                     | -0.084078 | -1.919947 | 4.863373                     | -0.704979 | -1.173545 |
| H    | 5.709285                     | -0.245738 | -0.744402 | 5.797987                     | -0.376911 | 0.274361  |

|   |           |           |           |           |           |           |
|---|-----------|-----------|-----------|-----------|-----------|-----------|
| H | 2.51524   | -1.898914 | -1.996758 | 2.91006   | -2.437518 | -1.078993 |
| H | 2.294512  | -2.843663 | -0.548406 | 2.261703  | -2.808378 | 0.497154  |
| H | 2.052406  | 2.297885  | 1.139129  | 1.999889  | 2.59559   | -0.137782 |
| H | -2.320992 | 0.526868  | 1.189999  | -2.190637 | 0.372364  | -1.464499 |
| H | -2.052009 | -3.315925 | -0.715499 | -1.83282  | -3.377905 | -1.160337 |
| H | -2.095075 | -1.856337 | -1.667638 | -1.446585 | -2.002149 | -2.18391  |
| H | 0.194334  | -2.489364 | -1.674625 | 0.628535  | -2.84287  | -1.30327  |
| H | 0.169122  | -3.020509 | -0.022102 | 0.022186  | -2.93711  | 0.32181   |
| H | -1.428353 | 2.680189  | 1.016713  | -1.398561 | 2.658322  | -1.196037 |
| H | -0.949051 | 1.970001  | 2.541706  | -1.02698  | 3.083103  | 0.465308  |
| H | 0.072216  | 3.191812  | 1.793191  | 0.07418   | 3.551154  | -0.82538  |
| H | 3.695297  | 2.207271  | -1.545021 | 4.248539  | 1.55217   | -1.878702 |
| H | 3.837551  | 2.916359  | 0.0655    | 4.06135   | 2.814759  | -0.658312 |
| H | 5.262987  | 2.254122  | -0.726895 | 5.568204  | 1.913303  | -0.757755 |
| H | 4.097726  | 1.410824  | 2.109452  | 3.634379  | 2.191064  | 1.771311  |
| H | 4.440955  | -0.304064 | 1.924829  | 3.877902  | 0.542038  | 2.333041  |
| H | 5.631228  | 0.895623  | 1.399609  | 5.255561  | 1.486634  | 1.74751   |
| H | -1.981276 | 0.406877  | -1.727001 | -2.471766 | 0.700301  | 1.442573  |
| H | -4.651043 | 2.119841  | -2.406659 | -4.003562 | 2.120259  | 2.217605  |
| H | -3.44376  | 3.380102  | -2.186187 | -4.079773 | 3.533682  | 1.144268  |
| H | -3.008838 | 1.875867  | -3.030954 | -5.371419 | 2.342829  | 1.104035  |
| H | -4.184658 | -2.699838 | 0.081734  | -1.414619 | -1.779964 | 1.613143  |
| H | -5.896104 | -1.115635 | 0.591831  | -3.258703 | -2.593717 | 2.8967    |
| H | -4.665229 | 0.215842  | 0.92414   | -4.404259 | -2.433703 | 1.463358  |
| H | -2.419706 | -1.550634 | 2.62202   | -4.530707 | -0.902747 | -0.431878 |
| H | -2.260206 | -3.142623 | 1.884409  | -3.802142 | -1.258865 | -1.992541 |
| H | -0.865872 | -2.05679  | 1.949549  | -4.19279  | -2.577675 | -0.886661 |

**Table S3** Energy analysis of **4a/4b** at B3LYP/6-311G\* level in methanol

| Configuration                        | Conformer                                                                           | E (Hartree) | Boltzmann distribution |
|--------------------------------------|-------------------------------------------------------------------------------------|-------------|------------------------|
| 13 <i>R</i> ,14 <i>R</i> - <b>4a</b> | 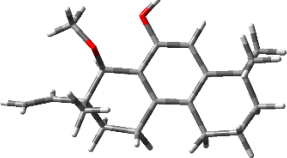 | -929.444494 | 100%                   |
| 13 <i>S</i> ,14 <i>S</i> - <b>4b</b> |  | -929.449138 | 100%                   |

**Table S4** Cartesian coordinates of low-energy conformers of **4a/4b** optimized at B3LYP/6-311G\* level in methanol

| Atom | Conformer 13R,14R-4a |           |           | Conformer 13S,14S-4b |           |           |
|------|----------------------|-----------|-----------|----------------------|-----------|-----------|
|      | X                    | Y         | Z         | X                    | Y         | Z         |
| C    | 1.573441             | -3.923518 | 0.361713  | 0.815847             | -3.383789 | 0.192528  |
| C    | 2.483319             | -3.696937 | -0.842572 | 1.803251             | -3.289422 | -0.966844 |
| C    | 3.070081             | -2.266507 | -0.888115 | 2.45918              | -1.893343 | -1.076542 |
| C    | 1.990741             | -1.217692 | -0.555703 | 1.409445             | -0.778299 | -0.899541 |
| C    | 0.7391               | -1.548272 | -0.008923 | 0.101906             | -1.017717 | -0.436783 |
| C    | 0.361905             | -2.992296 | 0.282872  | -0.345732            | -2.412149 | -0.027233 |
| C    | 2.270119             | 0.133348  | -0.801347 | 1.785616             | 0.540839  | -1.187615 |
| C    | 1.357882             | 1.136943  | -0.50274  | 0.885849             | 1.591858  | -1.070751 |
| C    | 0.113465             | 0.832435  | 0.082832  | -0.445648            | 1.364538  | -0.686687 |
| C    | -0.199721            | -0.522448 | 0.268753  | -0.819525            | 0.055845  | -0.347301 |
| C    | -0.824871            | 1.985425  | 0.44461   | -1.441687            | 2.516822  | -0.672334 |
| C    | -2.110029            | 1.548103  | 1.219674  | -2.551202            | 2.325629  | 0.385431  |
| C    | -2.606552            | 0.227406  | 0.585278  | -3.2006              | 0.951993  | 0.099928  |
| C    | -1.592395            | -0.907804 | 0.733672  | -2.206348            | -0.210165 | 0.216294  |
| C    | 3.643424             | -2.045921 | -2.306503 | 3.125381             | -1.801455 | -2.468505 |
| O    | 1.631401             | 2.445859  | -0.808331 | 1.270275             | 2.892046  | -1.314576 |
| C    | -3.194286            | 2.588347  | 1.003687  | -2.026766            | 2.373491  | 1.809251  |
| C    | -3.892852            | 3.24914   | 1.928655  | -0.808004            | 2.700257  | 2.241843  |
| O    | -0.095227            | 2.935718  | 1.223413  | -2.12452             | 2.622458  | -1.933863 |
| C    | -0.221905            | 4.28305   | 0.806889  | -1.353359            | 3.102073  | -3.016554 |
| C    | -1.795527            | 1.347077  | 2.712095  | -3.614742            | 3.439454  | 0.253022  |
| C    | 4.226551             | -2.14215  | 0.134119  | 3.556194             | -1.743395 | 0.00582   |
| H    | 1.238898             | -4.967546 | 0.39972   | 0.431484             | -4.406625 | 0.288934  |
| H    | 2.123996             | -3.738197 | 1.293256  | 1.320776             | -3.15101  | 1.139117  |
| H    | 1.902362             | -3.876224 | -1.759198 | 1.268464             | -3.509541 | -1.90231  |
| H    | 3.310525             | -4.418584 | -0.853192 | 2.593473             | -4.046012 | -0.875153 |
| H    | -0.321448            | -3.363937 | -0.498373 | -1.017145            | -2.824789 | -0.797672 |
| H    | -0.204745            | -3.051236 | 1.219712  | -0.949462            | -2.357526 | 0.886192  |
| H    | 3.223274             | 0.418447  | -1.242811 | 2.802041             | 0.757913  | -1.51065  |
| H    | -1.138974            | 2.465735  | -0.496074 | -0.909978            | 3.459275  | -0.486736 |
| H    | -3.56138             | -0.060306 | 1.04204   | -4.038817            | 0.78141   | 0.788298  |
| H    | -2.808318            | 0.394951  | -0.482746 | -3.617298            | 0.98718   | -0.911842 |
| H    | -1.942557            | -1.770812 | 0.154377  | -2.640811            | -1.101239 | -0.253571 |
| H    | -1.566687            | -1.250485 | 1.777984  | -2.08387             | -0.469395 | 1.279095  |
| H    | 2.846032             | -2.034669 | -3.058044 | 2.375022             | -1.824773 | -3.266658 |
| H    | 4.202533             | -1.108307 | -2.392906 | 3.718417             | -0.889014 | -2.590523 |
| H    | 4.335374             | -2.859249 | -2.558134 | 3.802782             | -2.652038 | -2.614527 |
| H    | 2.499672             | 2.480571  | -1.238884 | 2.213206             | 2.894551  | -1.540355 |
| H    | -3.433455            | 2.769187  | -0.047508 | -2.790822            | 2.138886  | 2.554459  |
| H    | -4.672467            | 3.951931  | 1.646267  | -0.583152            | 2.728729  | 3.305122  |

|   |           |           |           |           |           |           |
|---|-----------|-----------|-----------|-----------|-----------|-----------|
| H | -3.721126 | 3.124027  | 2.993643  | 0.011549  | 2.94503   | 1.572576  |
| H | 0.387209  | 4.876933  | 1.495124  | -2.046826 | 3.233612  | -3.852721 |
| H | 0.160195  | 4.421556  | -0.213422 | -0.879526 | 4.066891  | -2.78424  |
| H | -1.260688 | 4.636028  | 0.860935  | -0.567549 | 2.395071  | -3.31613  |
| H | -1.536302 | 2.296421  | 3.184136  | -4.392292 | 3.317566  | 1.016928  |
| H | -2.659354 | 0.917574  | 3.233092  | -3.161022 | 4.427478  | 0.392754  |
| H | -0.94246  | 0.677652  | 2.853343  | -4.085694 | 3.412014  | -0.732154 |
| H | 4.658035  | -1.135448 | 0.119533  | 4.040718  | -0.762754 | -0.055571 |
| H | 3.886654  | -2.336406 | 1.156716  | 3.146382  | -1.841633 | 1.016404  |
| H | 5.025837  | -2.85643  | -0.10172  | 4.330501  | -2.510095 | -0.124554 |

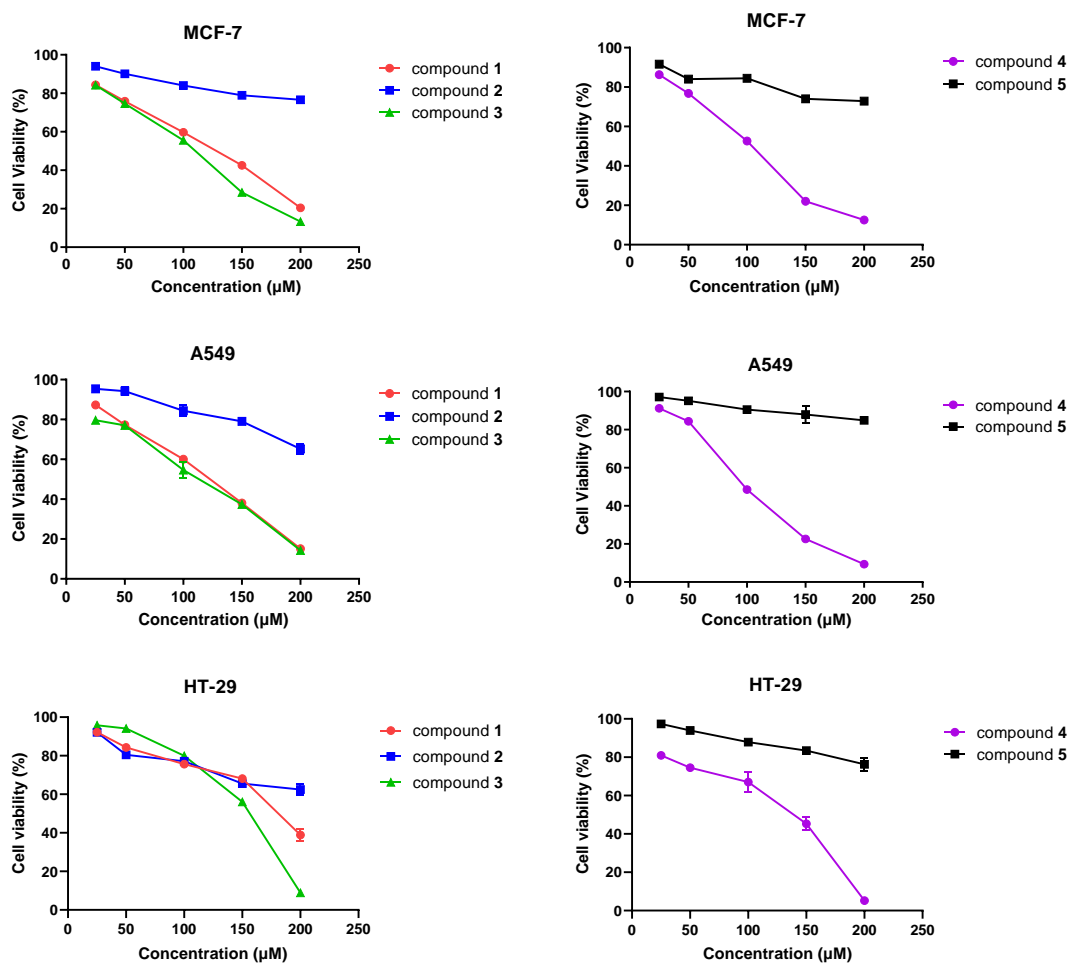

**Fig. S1** Cell viability of cancer cells. Each dot represents a mean value and SEM of three dependent experiments (n = 3).

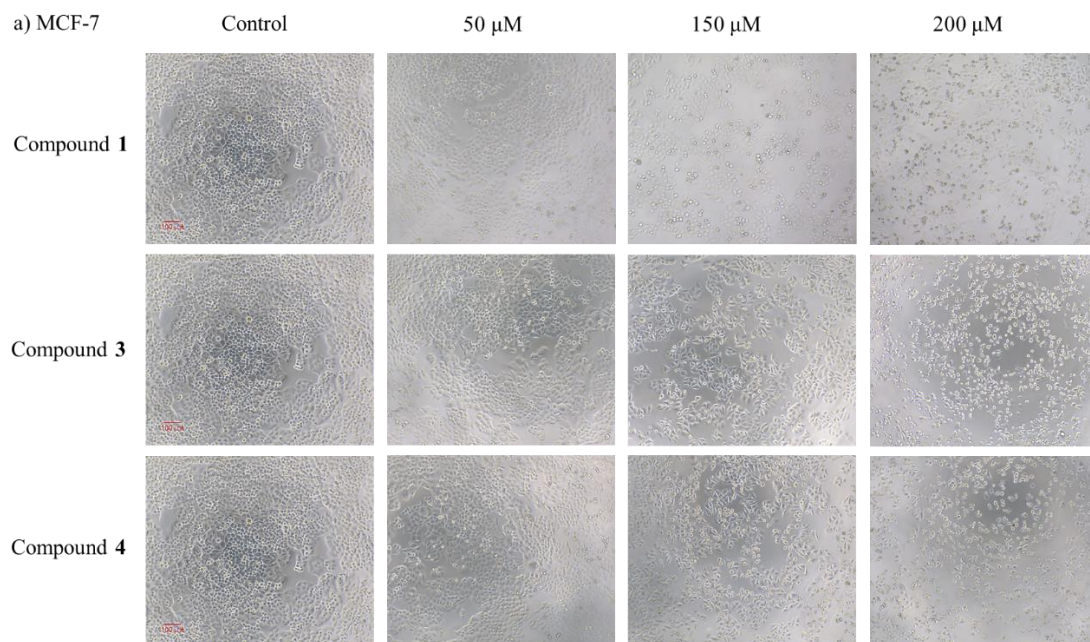

Scale bar: 100  $\mu\text{m}$

**Fig. S2** The morphology and quantity changes of compounds-incubated MCF-7 cells.

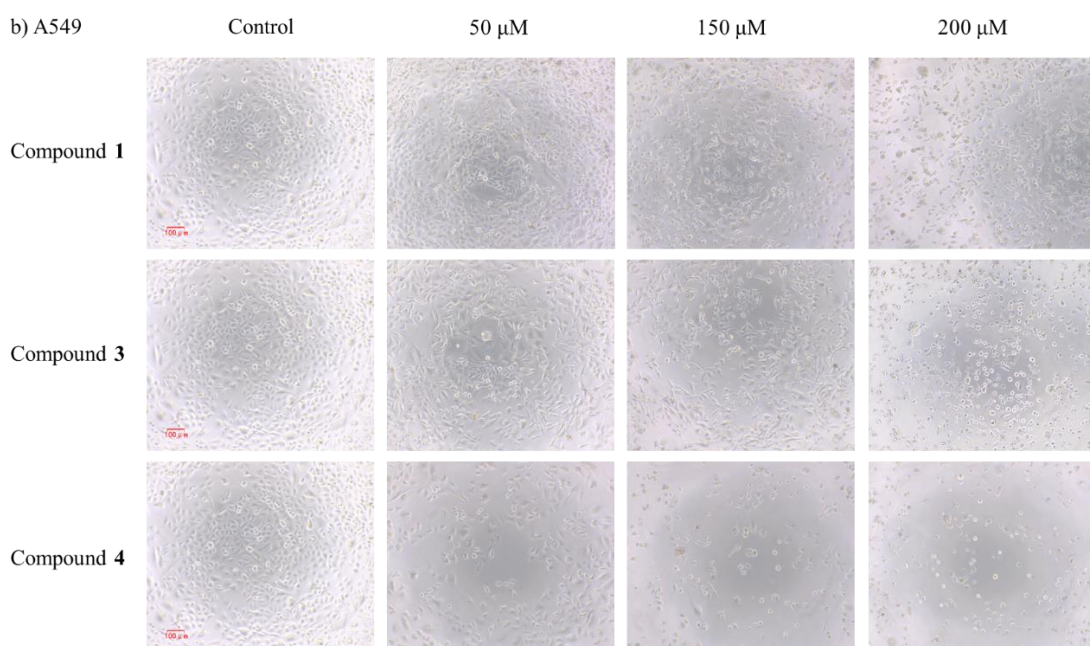

Scale bar: 100  $\mu\text{m}$

**Fig. S3** The morphology and quantity changes of compounds-incubated A549 cells.



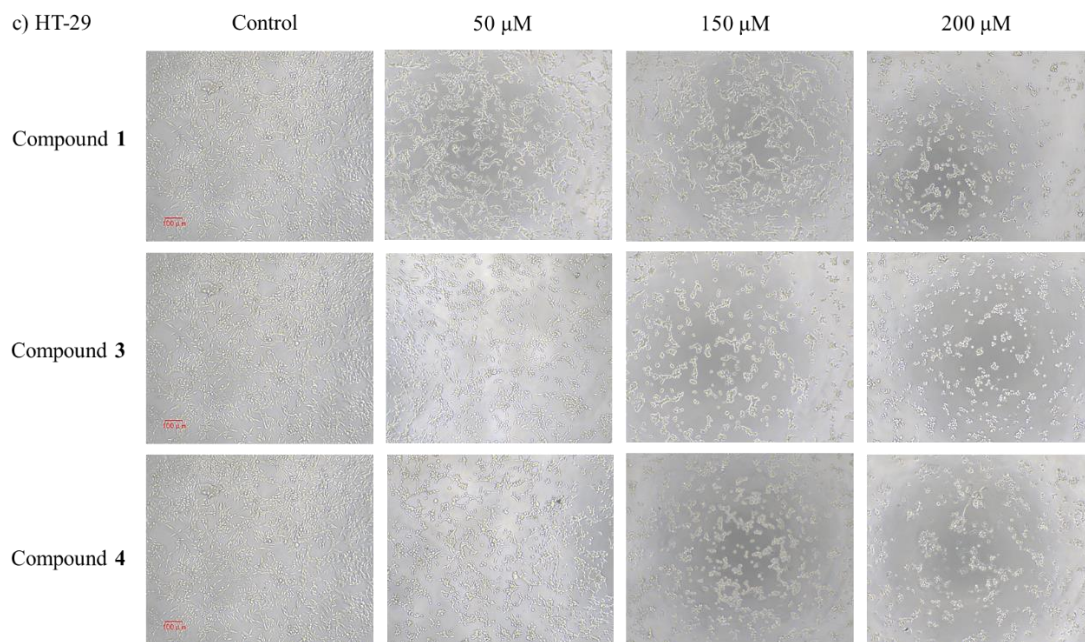

Scale bar: 100  $\mu\text{m}$

**Fig. S4** The morphology and quantity changes of compounds-incubated HT-29 cells.

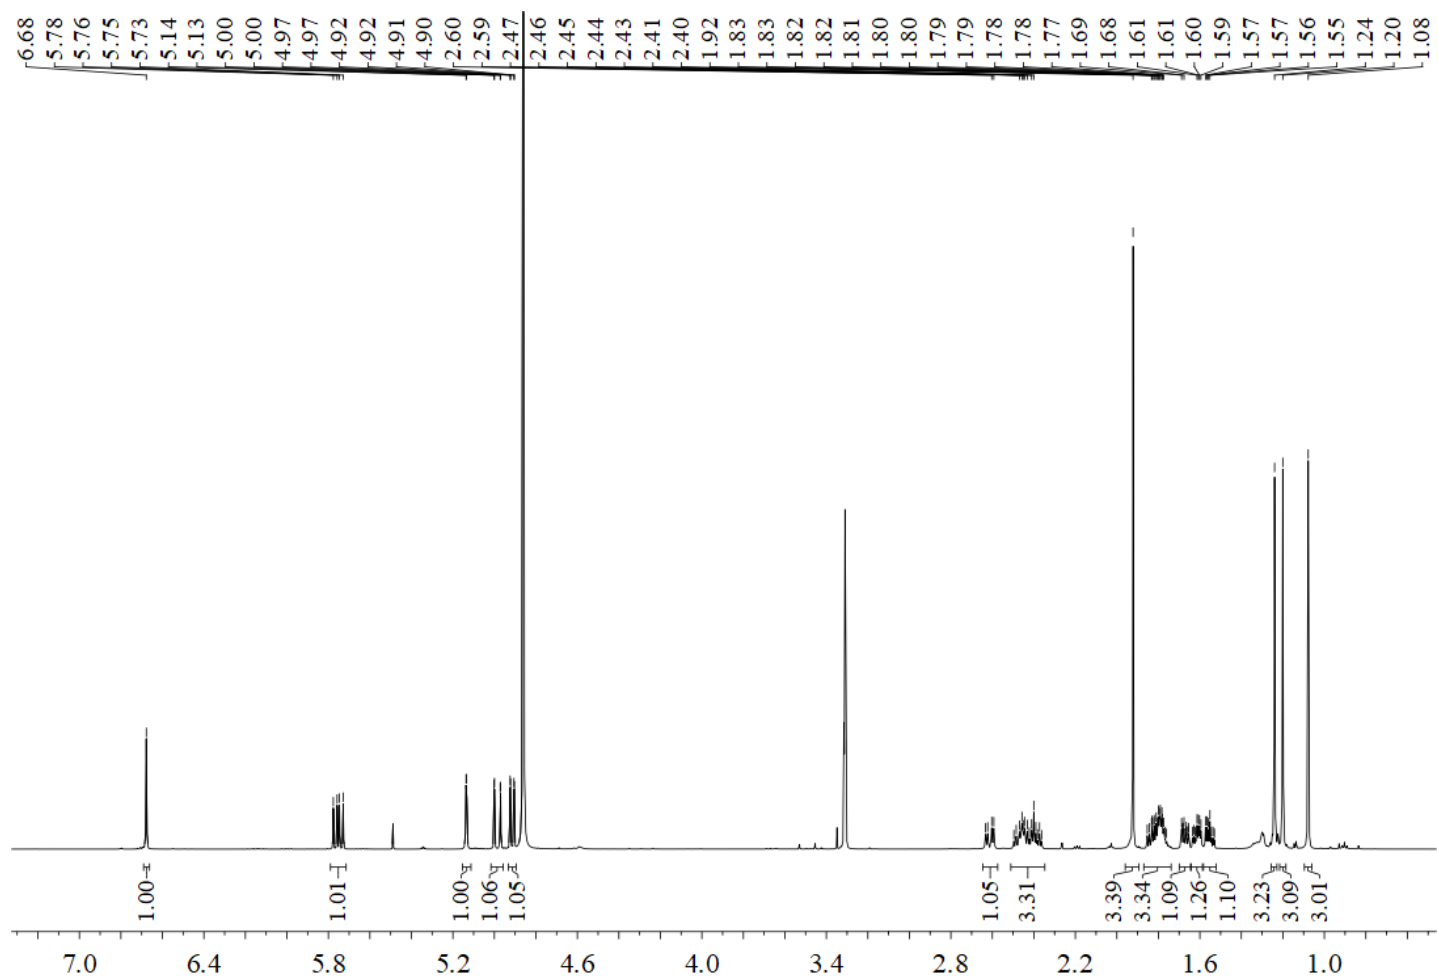

Fig. S5 <sup>1</sup>H-NMR (600 MHz, CD<sub>3</sub>OD) spectrum of compound 1.

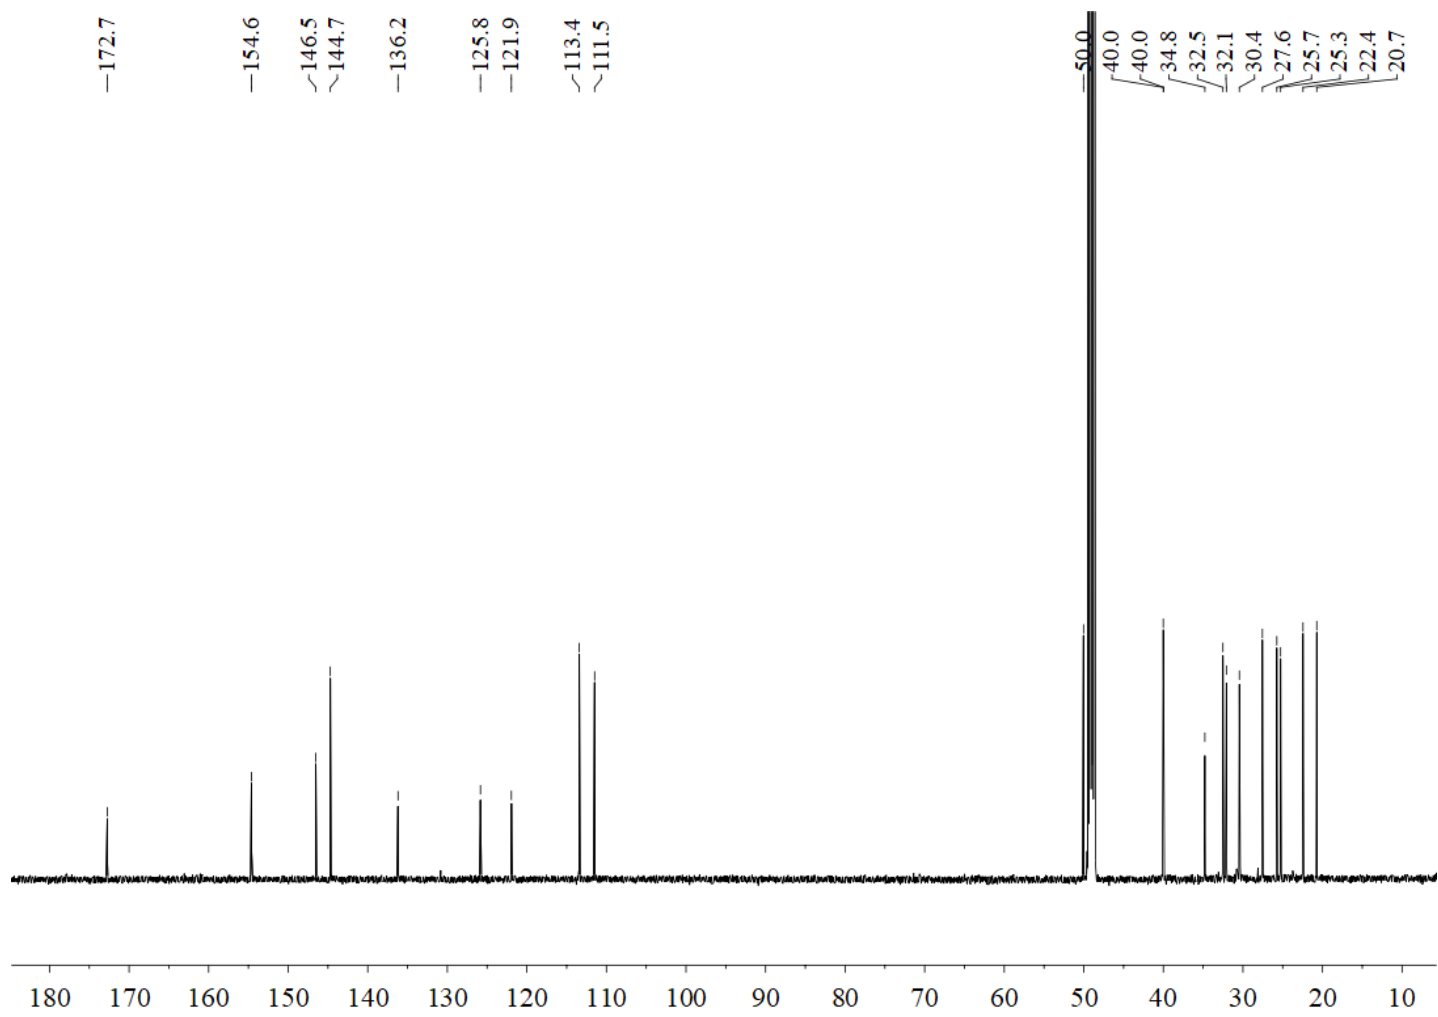

Fig. S6  $^{13}\text{C}$ -NMR (150 MHz,  $\text{CD}_3\text{OD}$ ) spectrum of compound 1.

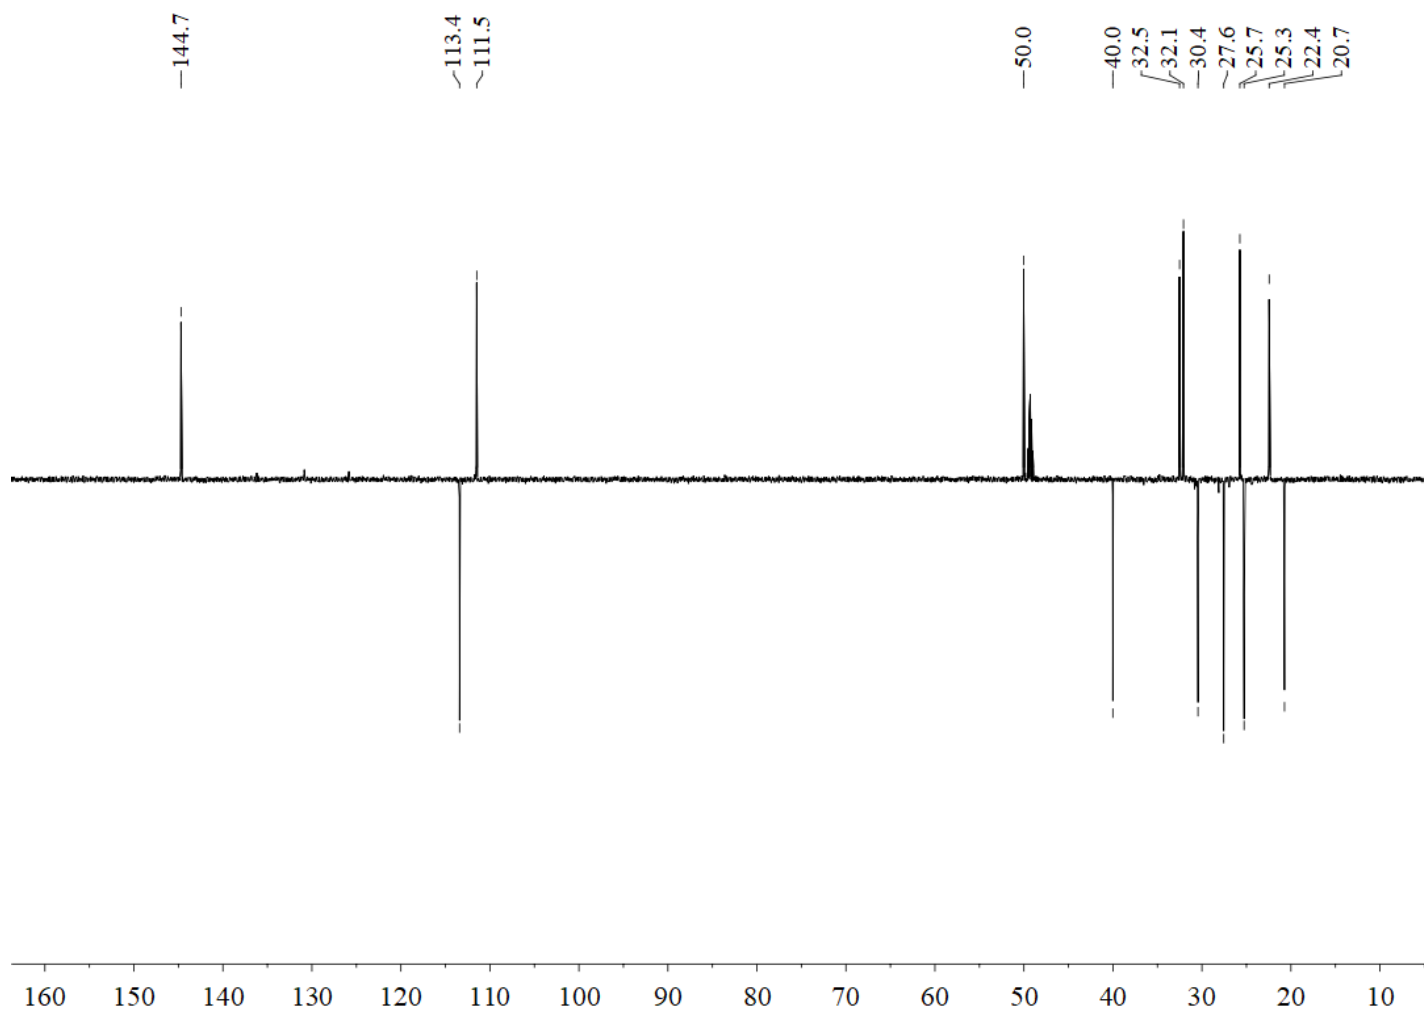

**Fig. S7** DEPT-135 (150 MHz, CD<sub>3</sub>OD) spectrum of compound **1**.

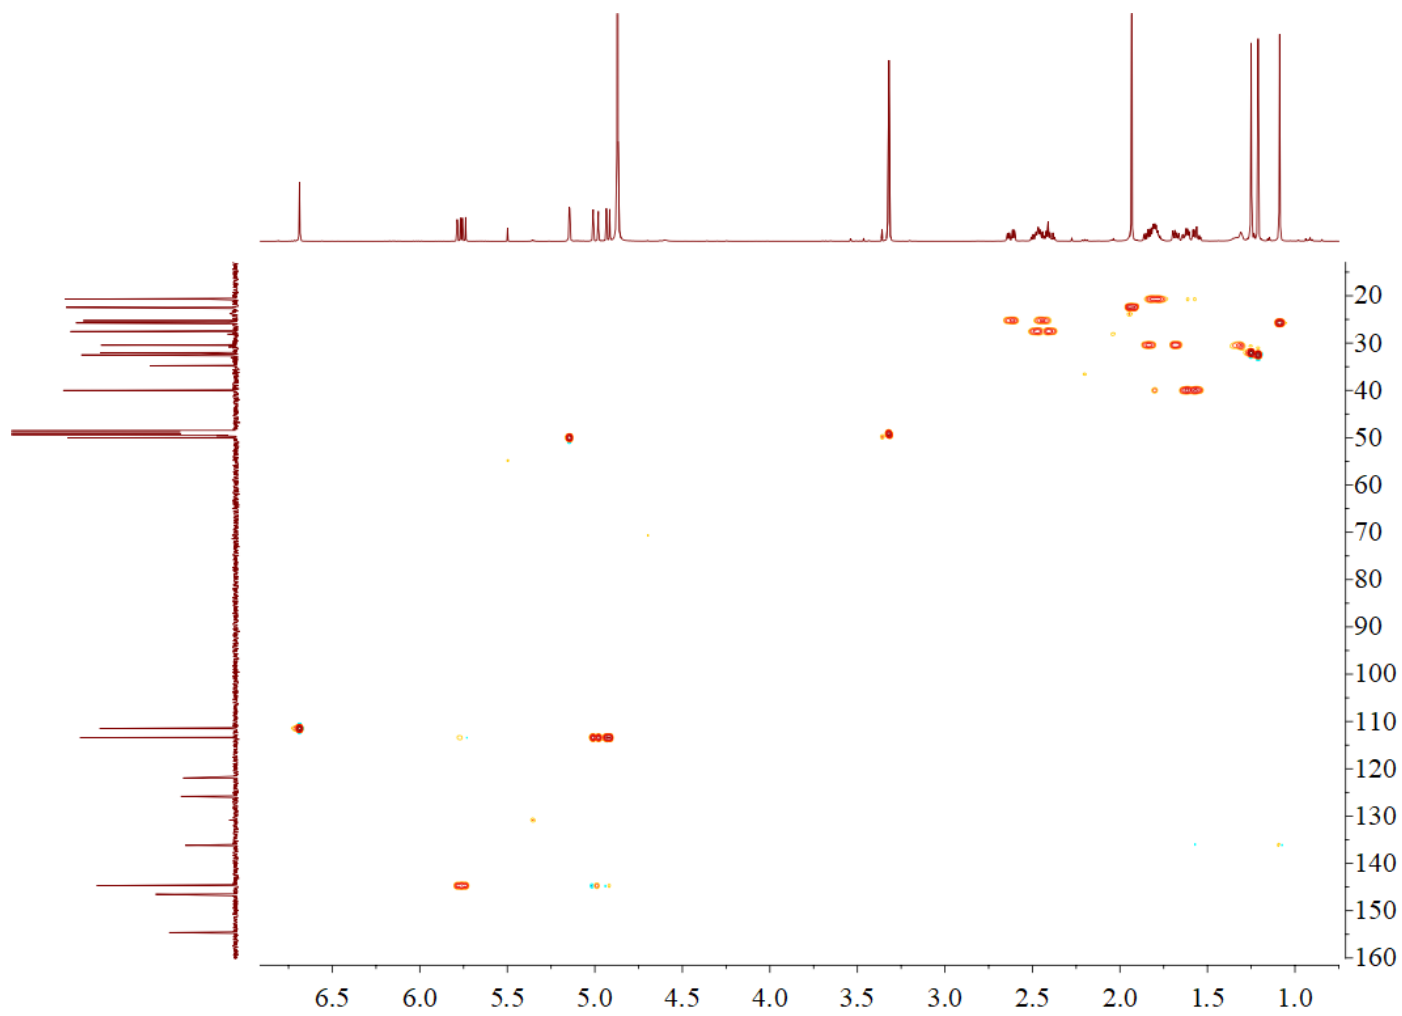

**Fig. S8** HSQC spectrum (CD<sub>3</sub>OD) of compound **1**.

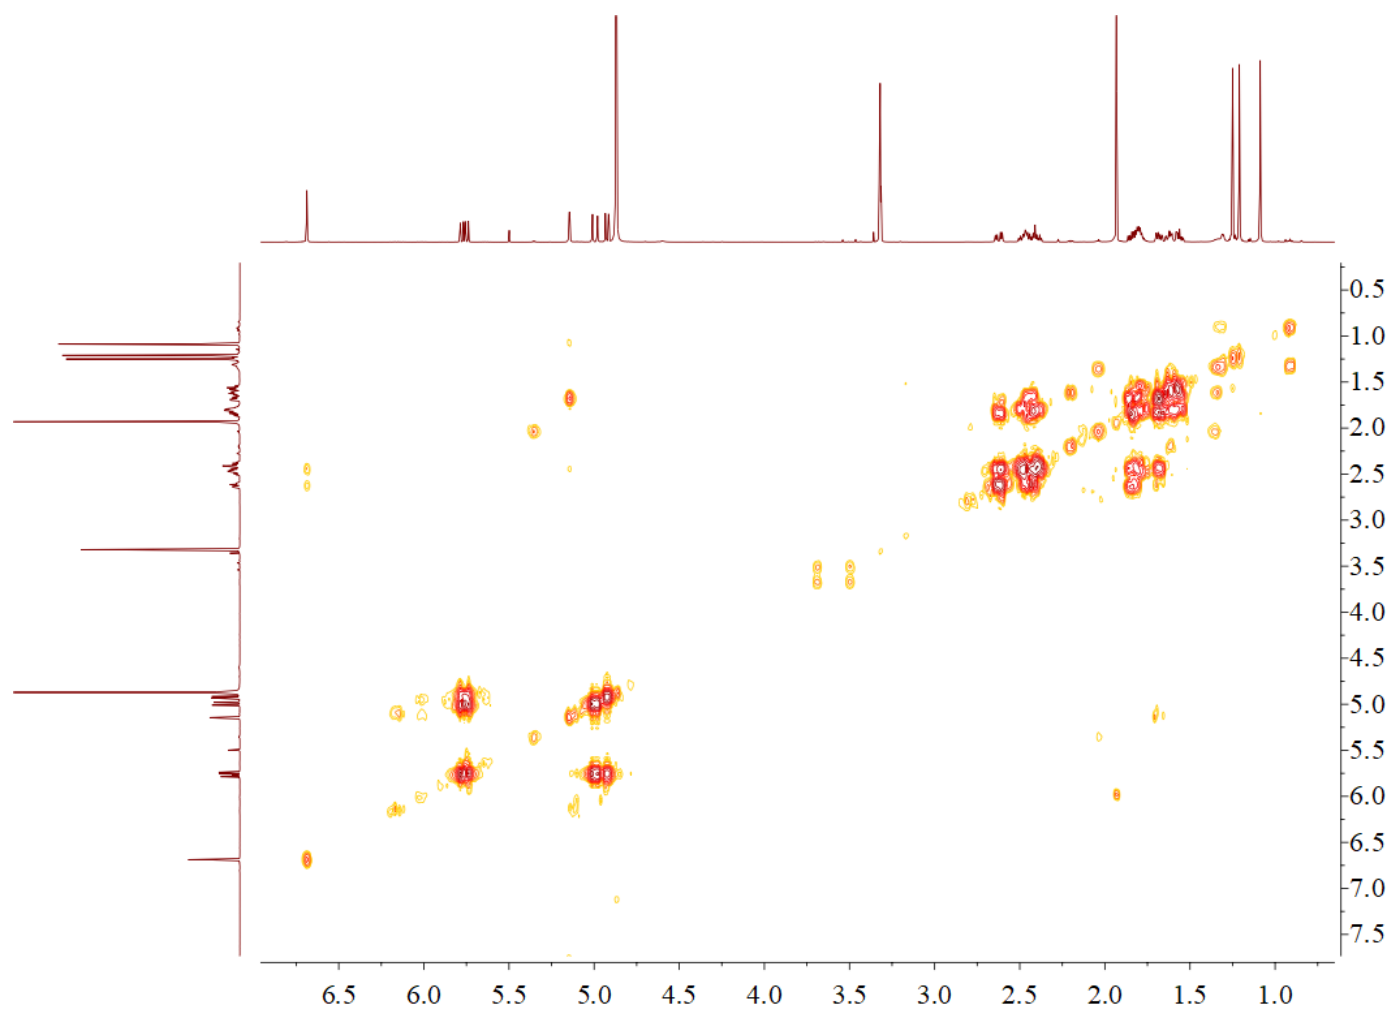

**Fig. S9**  $^1\text{H}$ - $^1\text{H}$  COSY spectrum ( $\text{CD}_3\text{OD}$ ) of compound **1**.

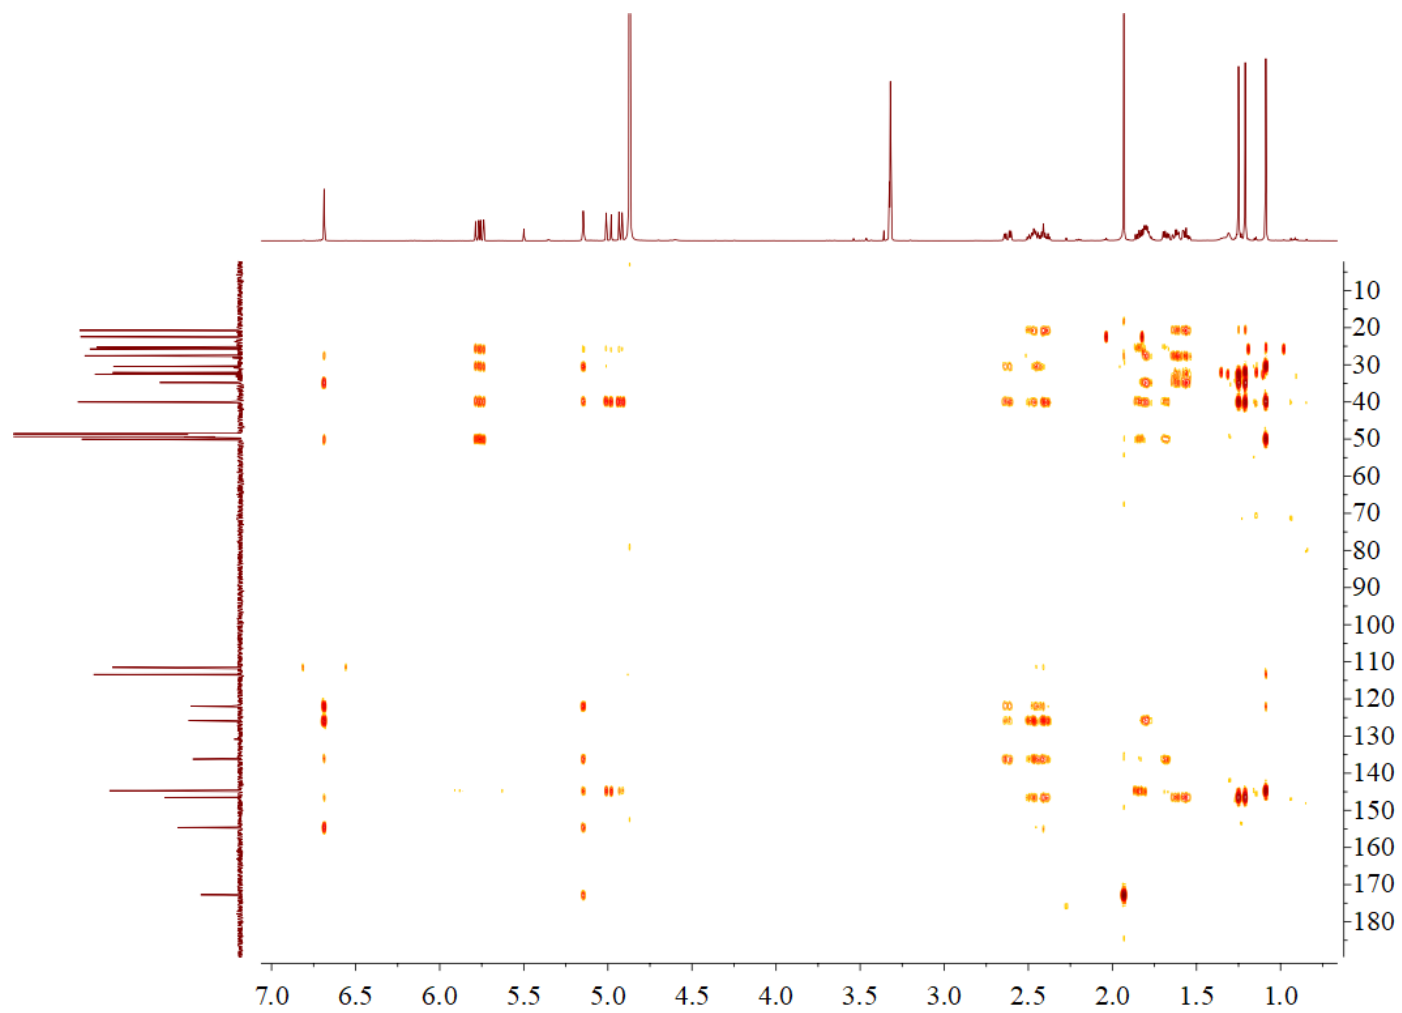

**Fig. S10** HMBC spectrum (CD<sub>3</sub>OD) of compound **1**.

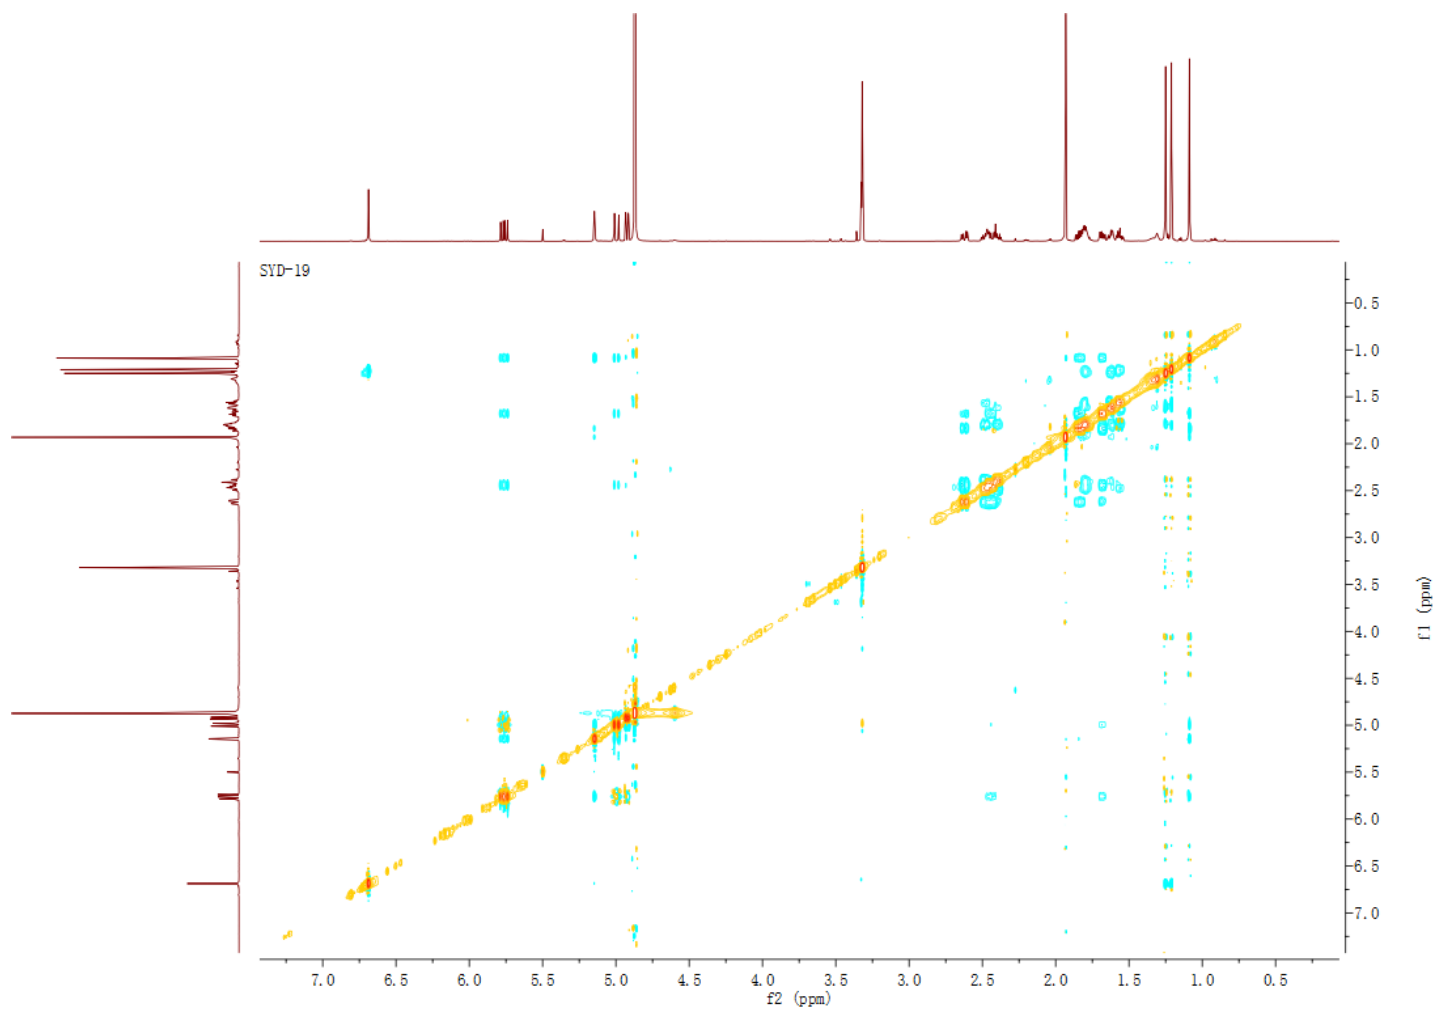

**Fig. S11** NOESY spectrum ( $\text{CD}_3\text{OD}$ ) of compound **1**.



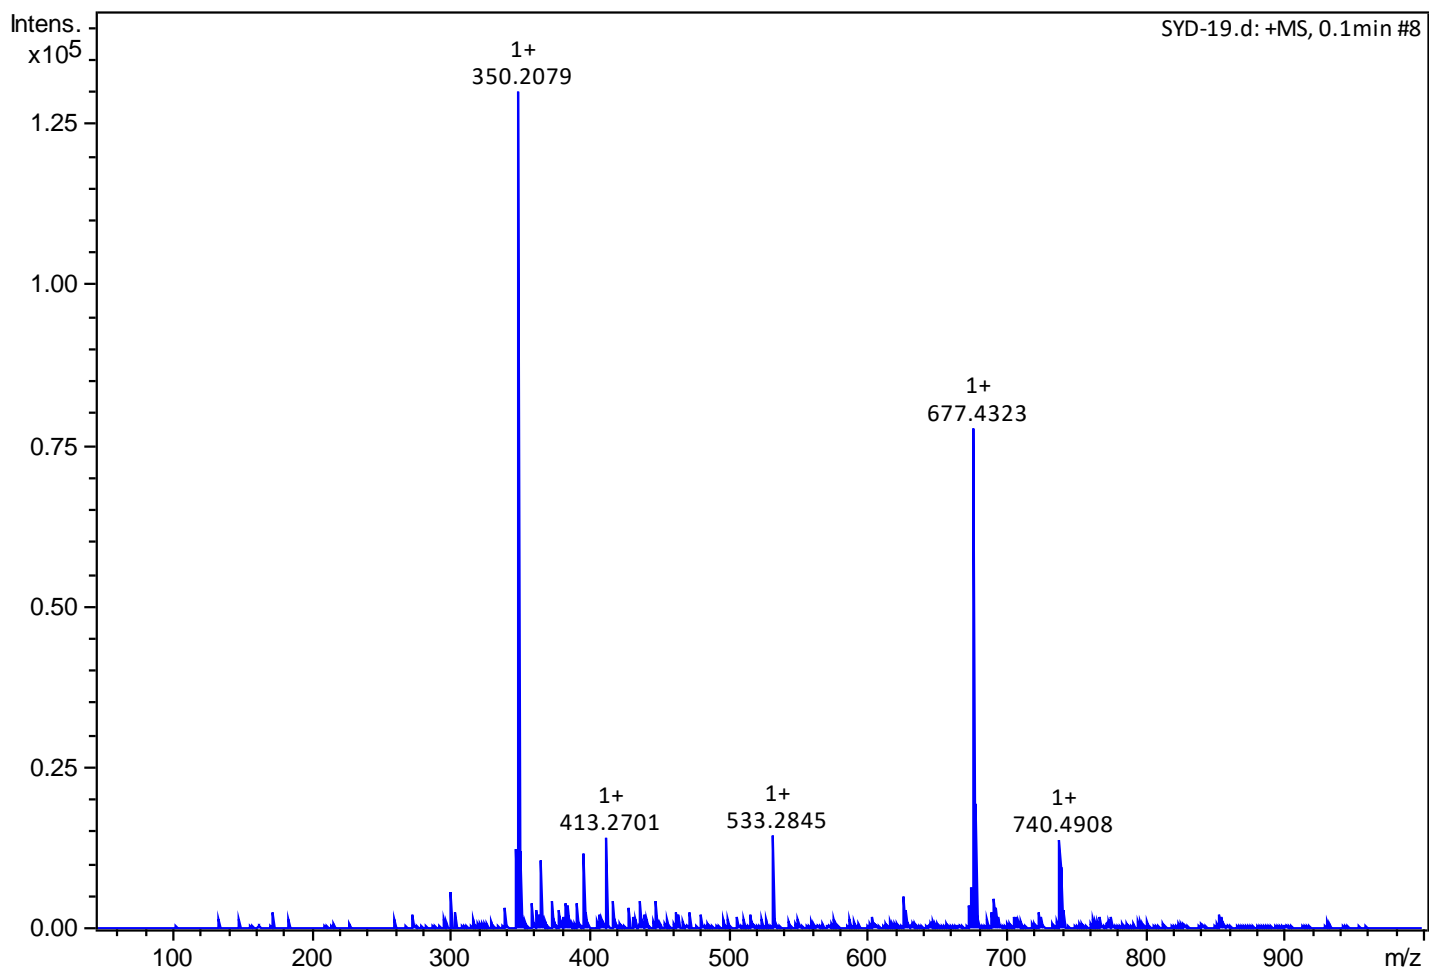

**Fig. S12** HRTOFMS spectrum of compound **1**.

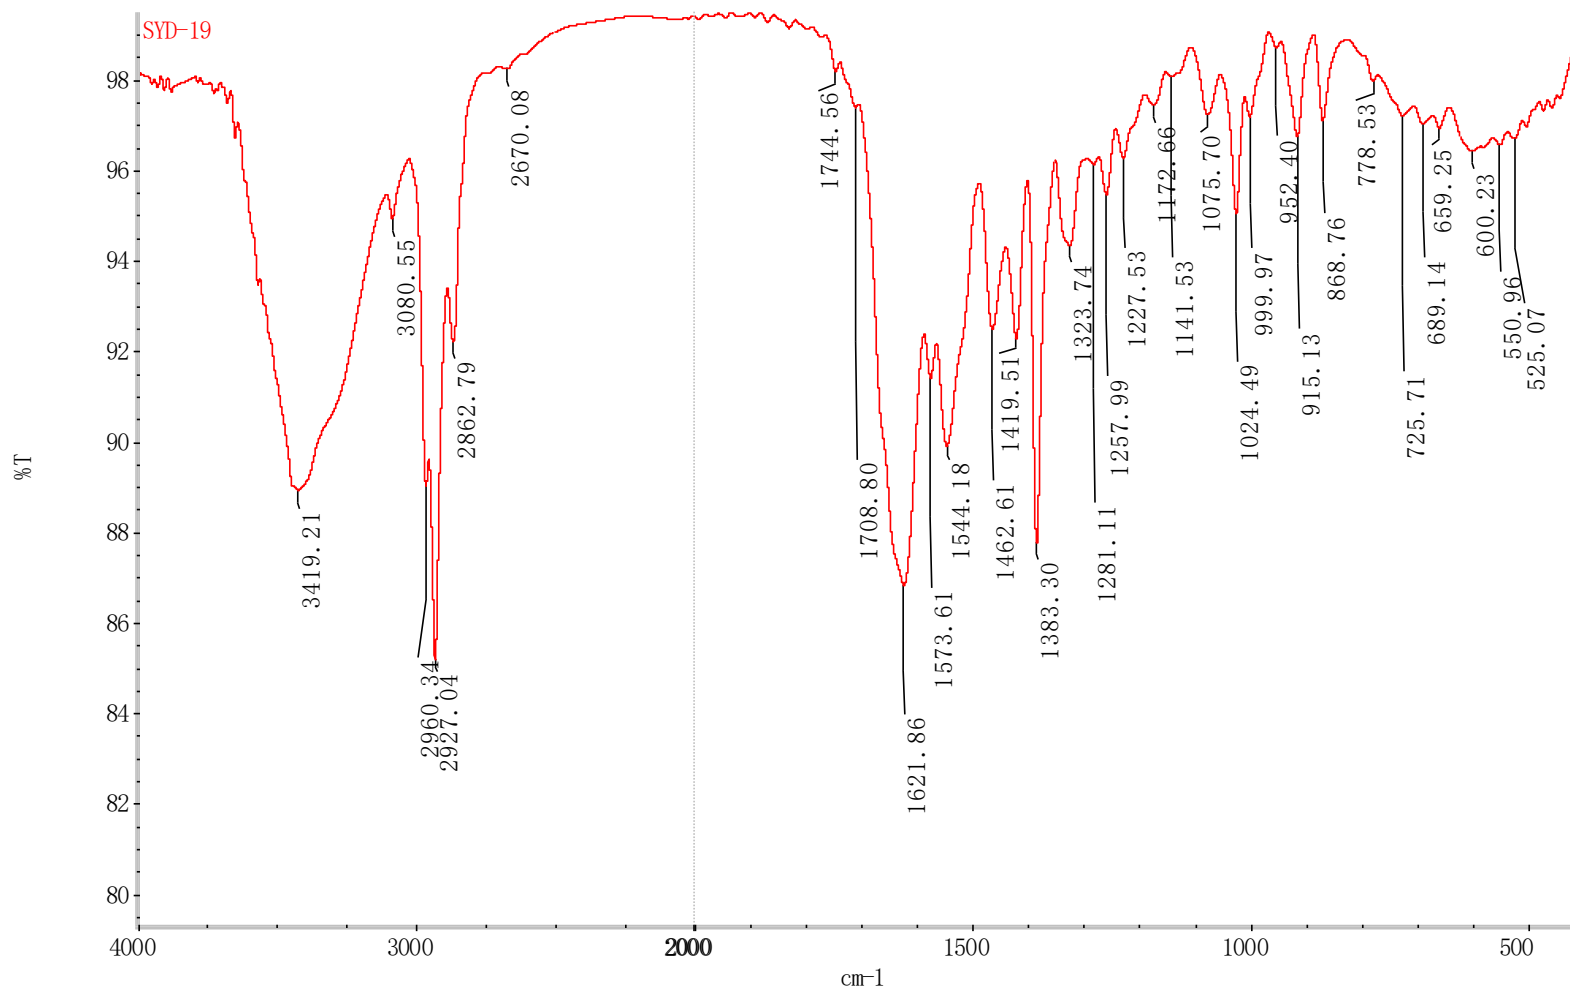

Fig. S13 IR spectrum of compound 1.

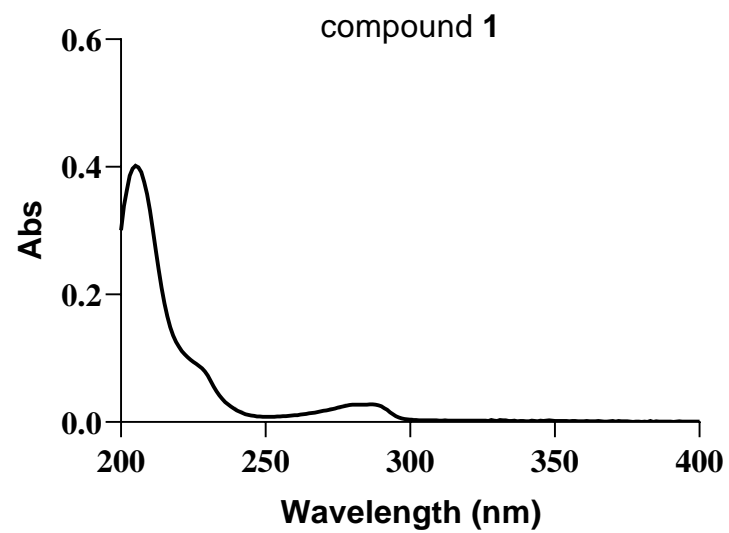

Fig. S14 UV spectrum of compound 1.

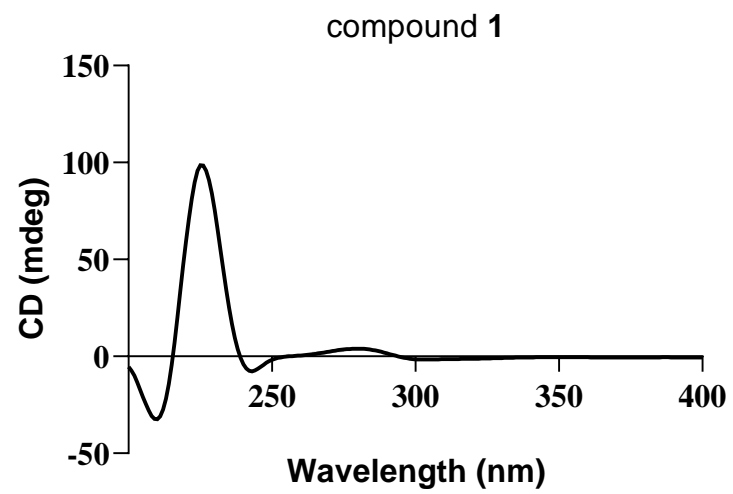

**Fig. S15** CD spectrum of compound 1.

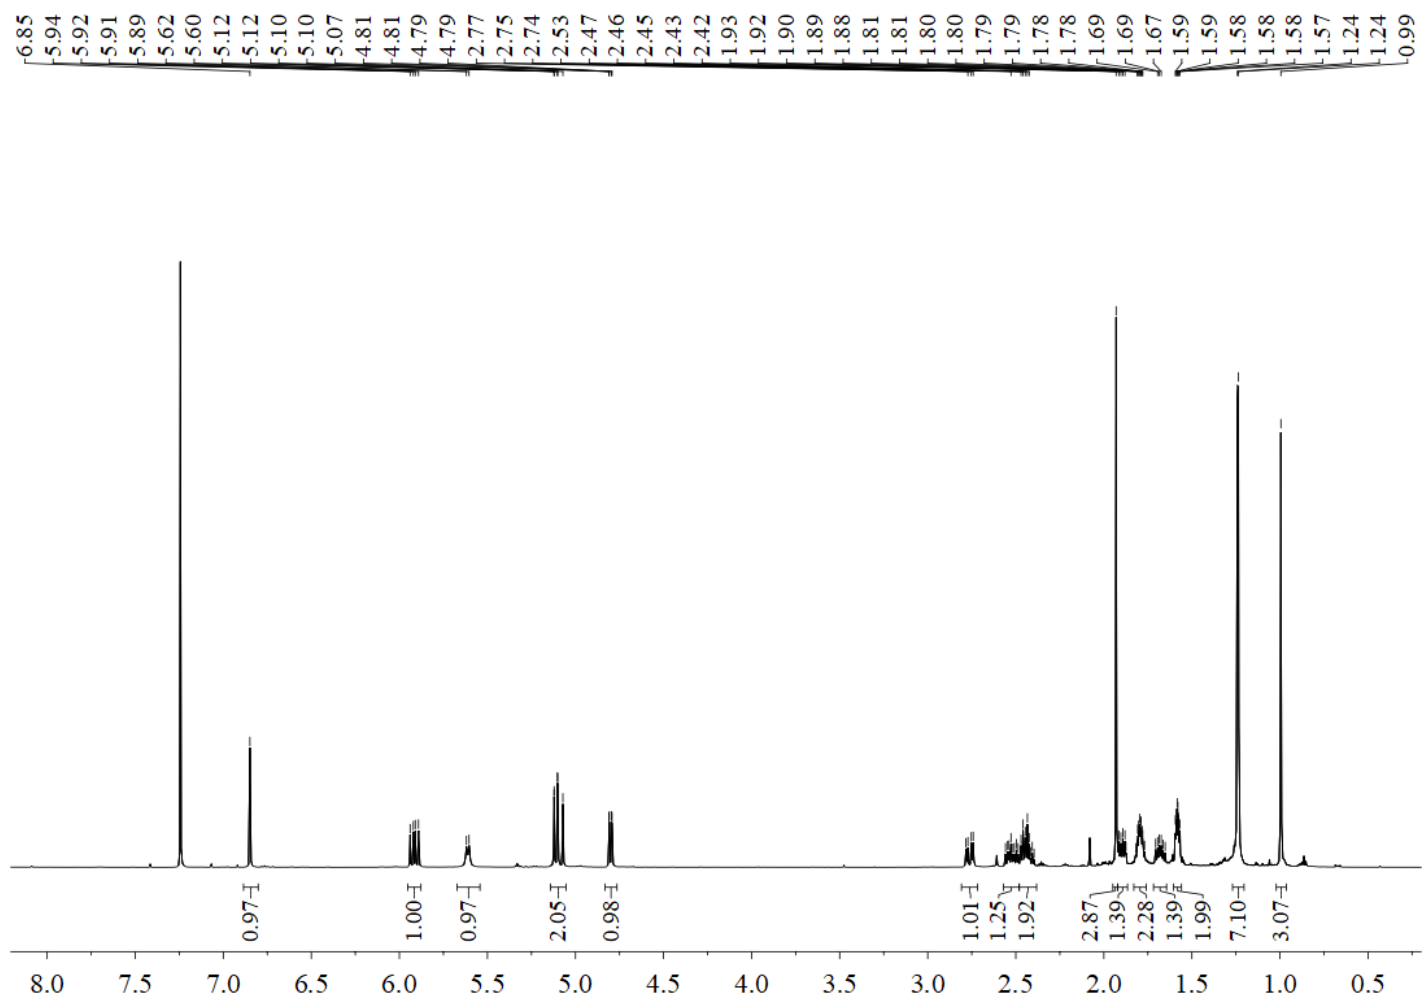

Fig. S16 <sup>1</sup>H-NMR (600 MHz, CDCl<sub>3</sub>) spectrum of compound 2.

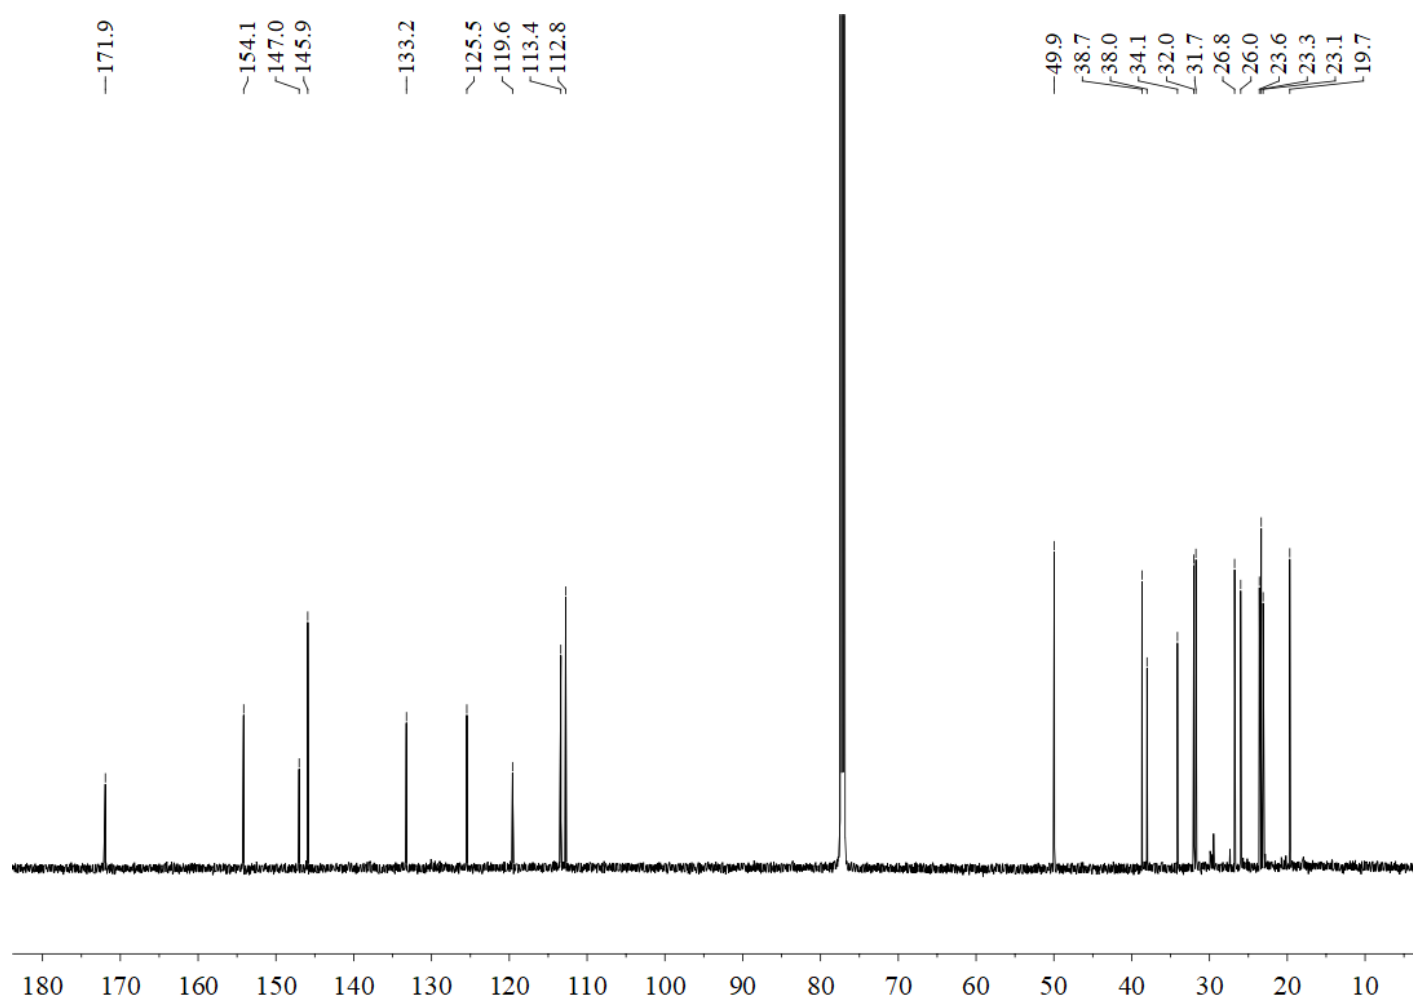

**Fig. S17**  $^{13}\text{C}$ -NMR (150 MHz,  $\text{CDCl}_3$ ) spectrum of compound 2.

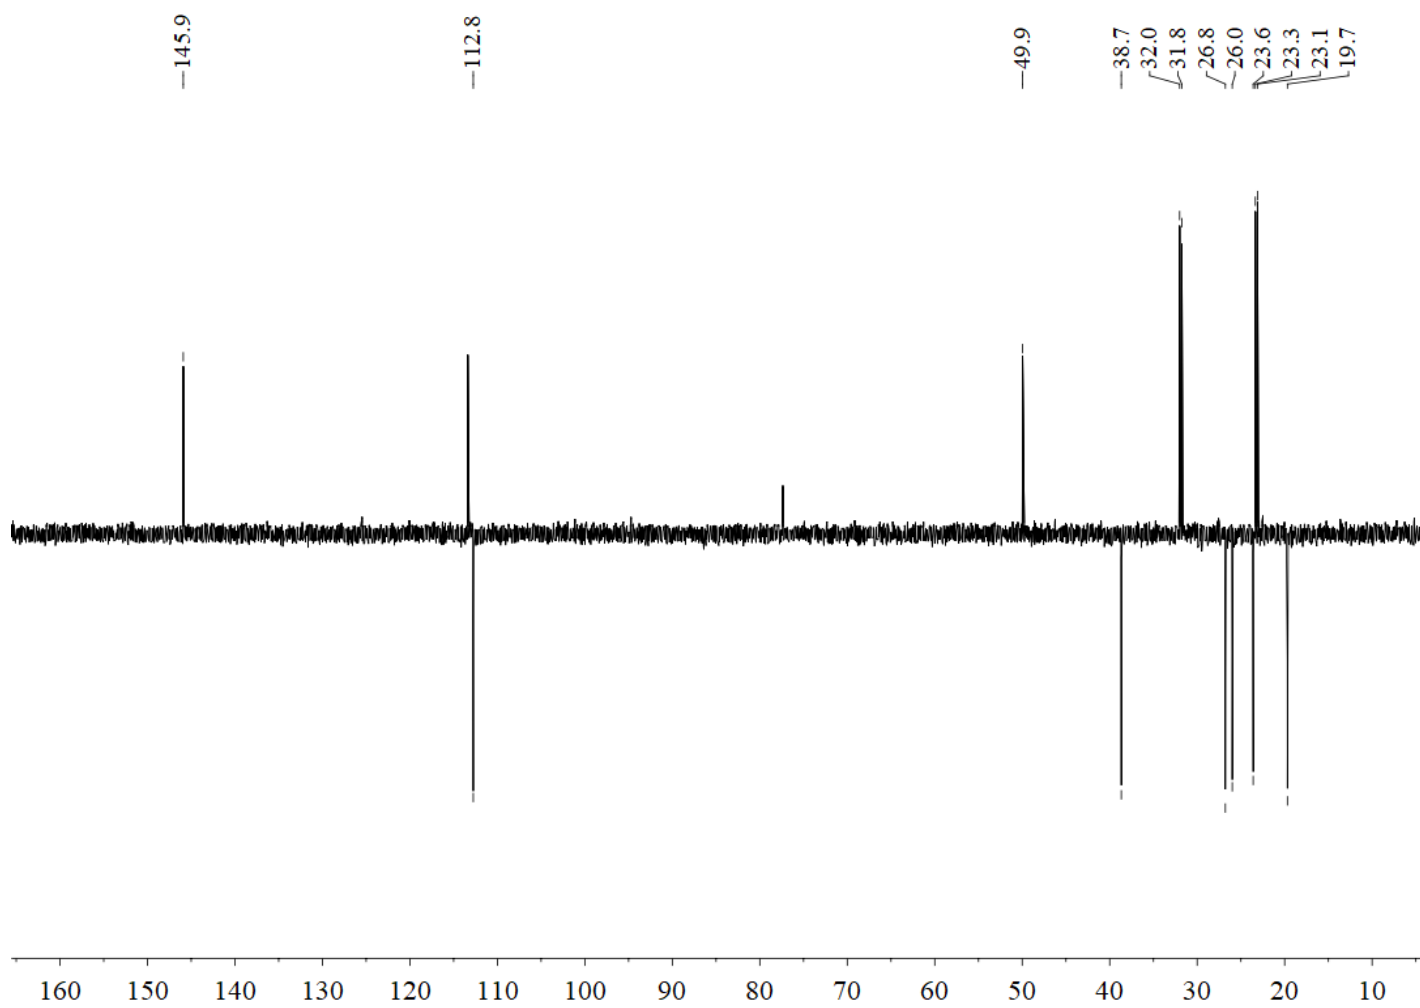

**Fig. S18** DEPT-135 (150 MHz, CDCl<sub>3</sub>) spectrum of compound **2**.

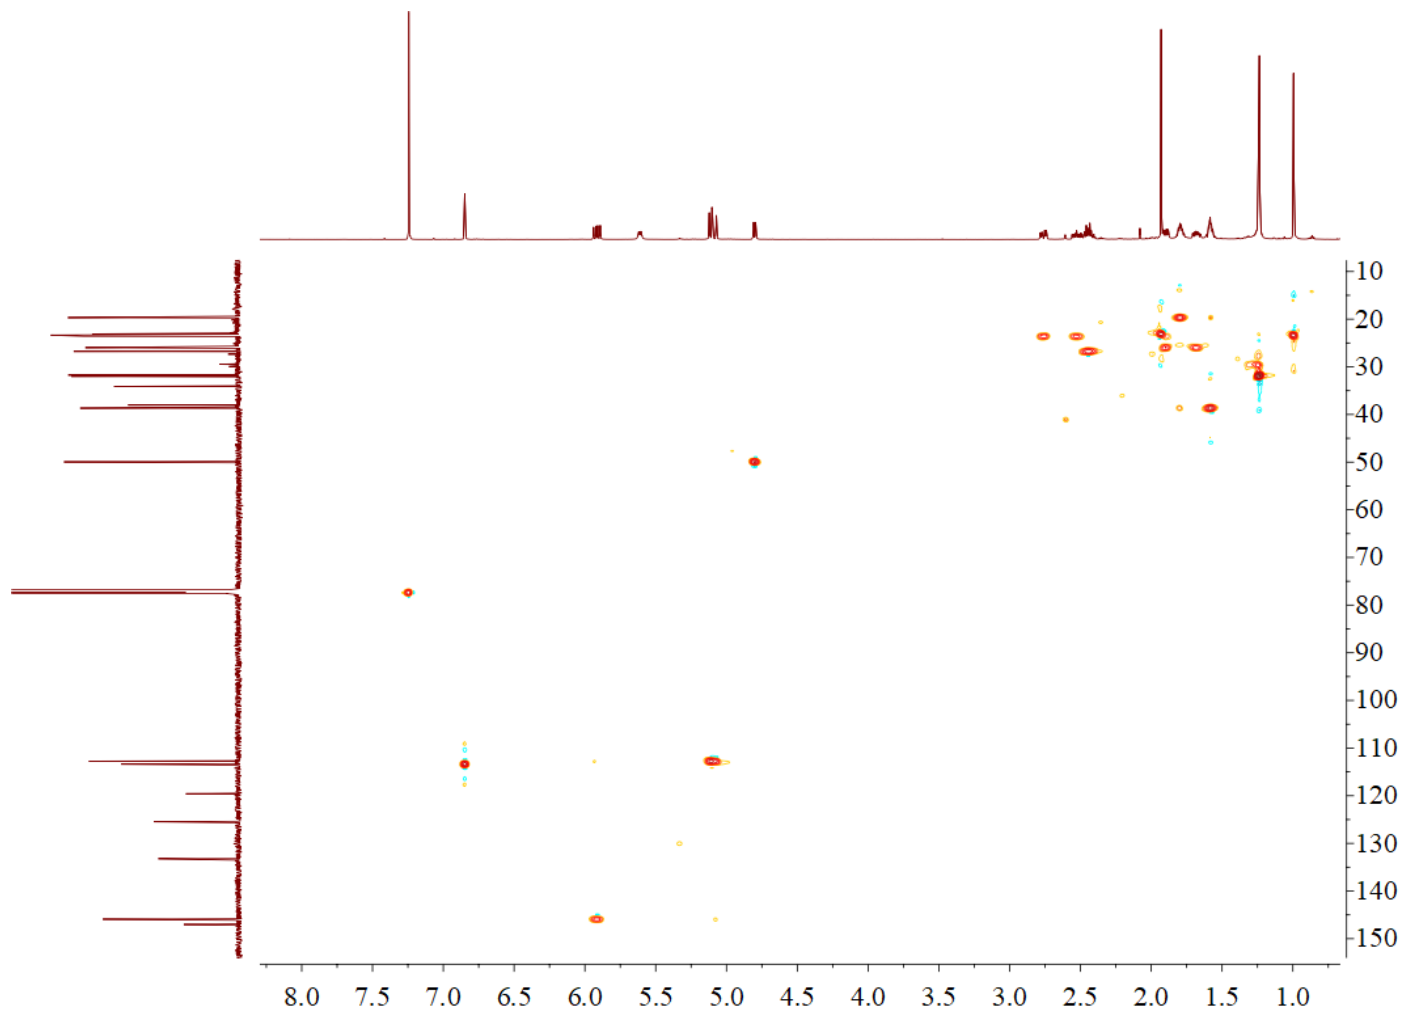

**Fig. S19** HSQC spectrum (CDCl<sub>3</sub>) of compound **2**.



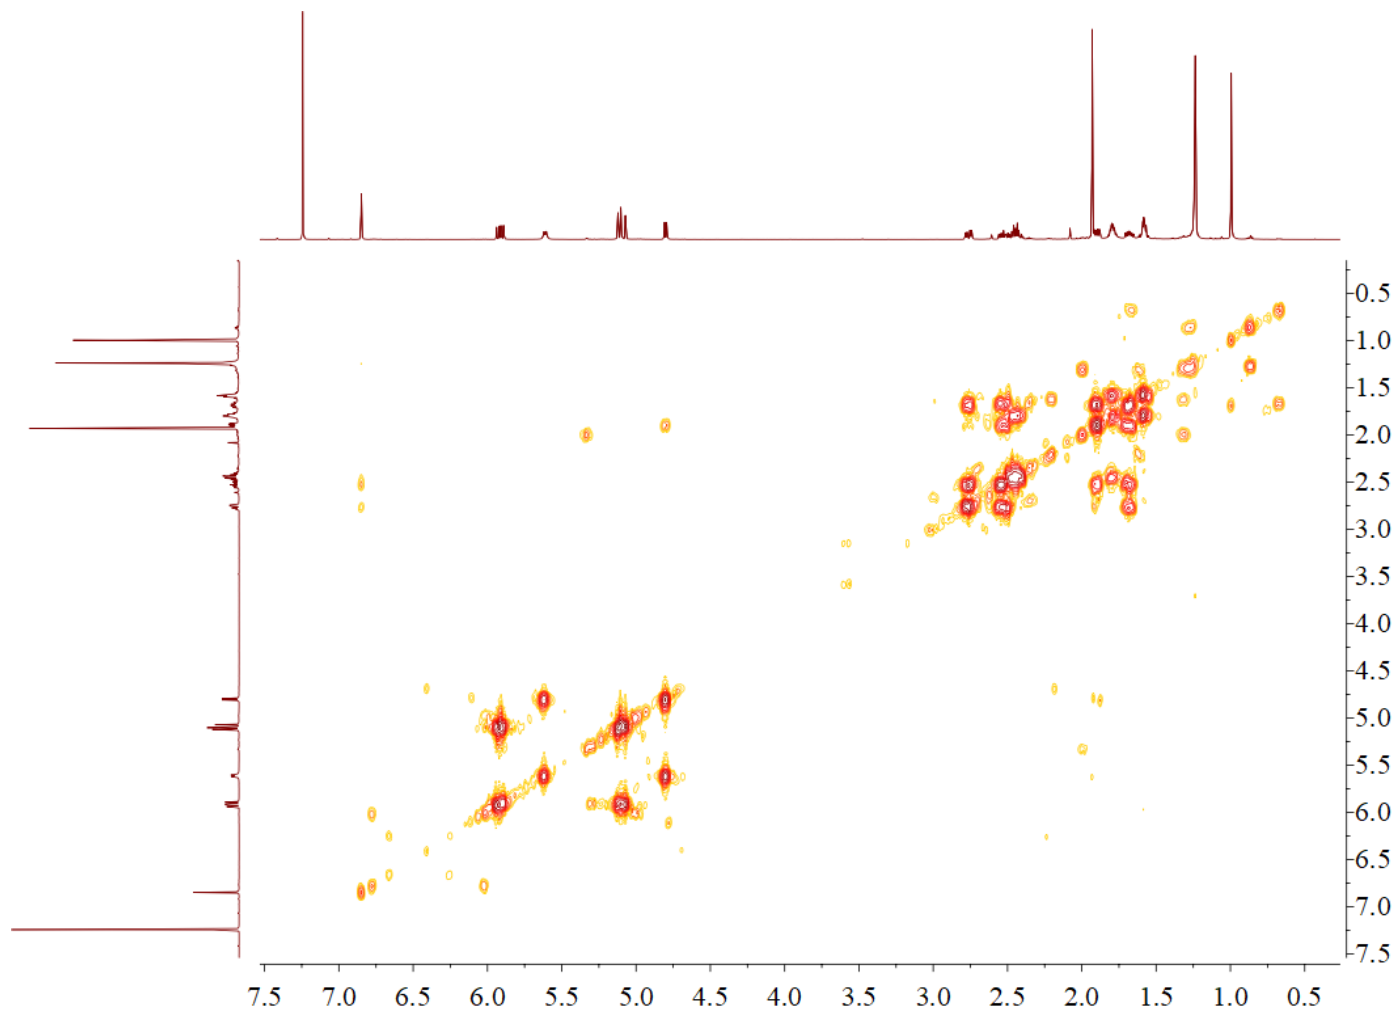

**Fig. S20**  $^1\text{H}$ - $^1\text{H}$  COSY spectrum ( $\text{CDCl}_3$ ) of compound **2**.

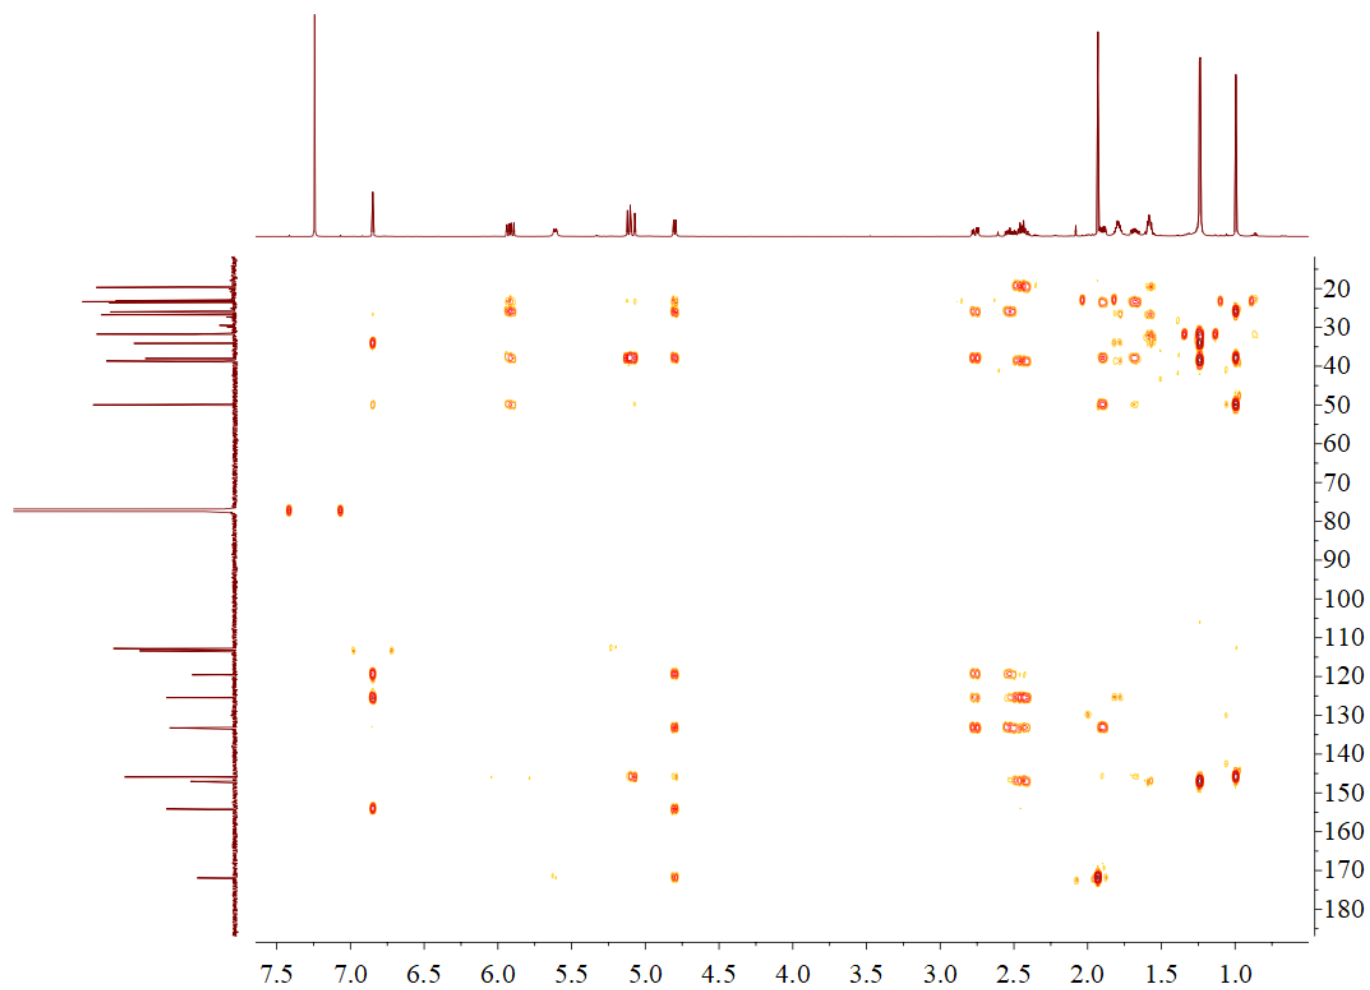

**Fig. S21** HMBC spectrum ( $\text{CDCl}_3$ ) of compound **2**.

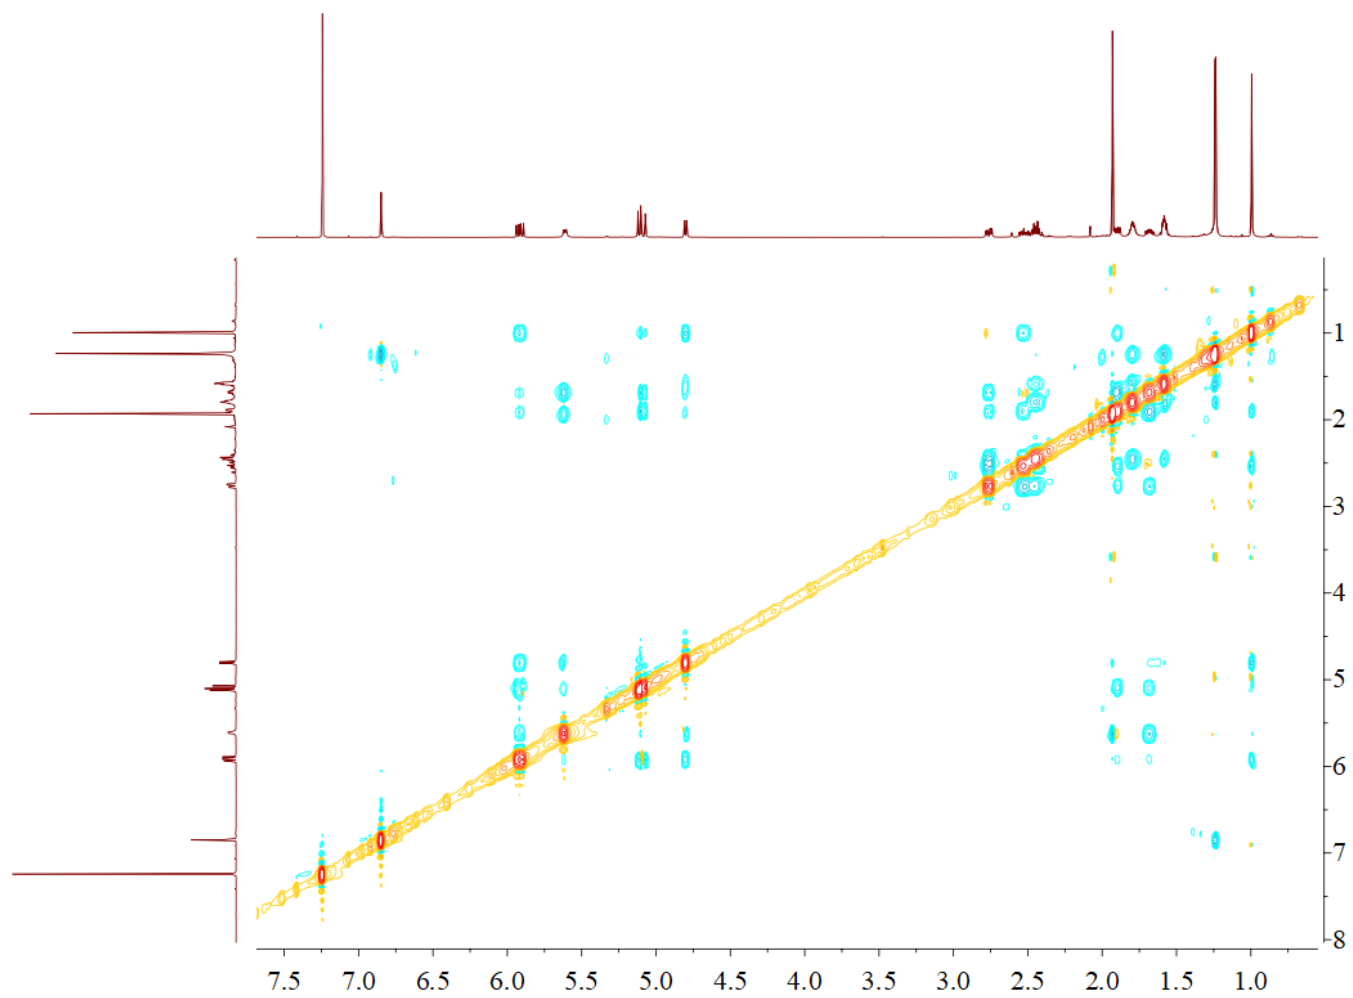

**Fig. S22** NOESY spectrum ( $\text{CDCl}_3$ ) of compound **2**.

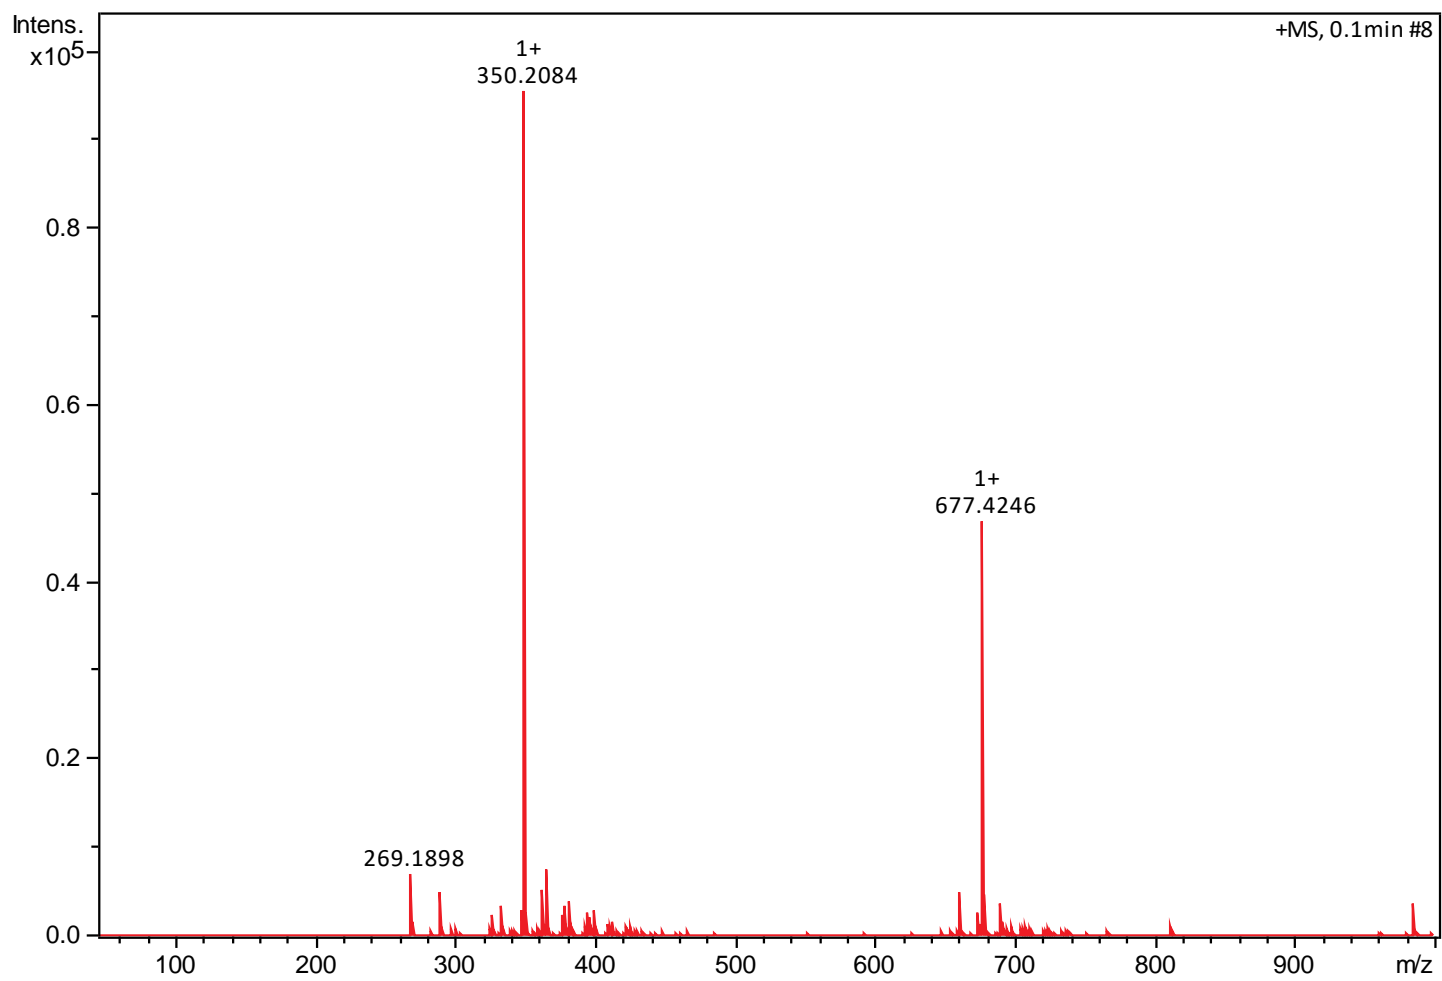

**Fig. S23** HRTOFMS spectrum of compound **2**.

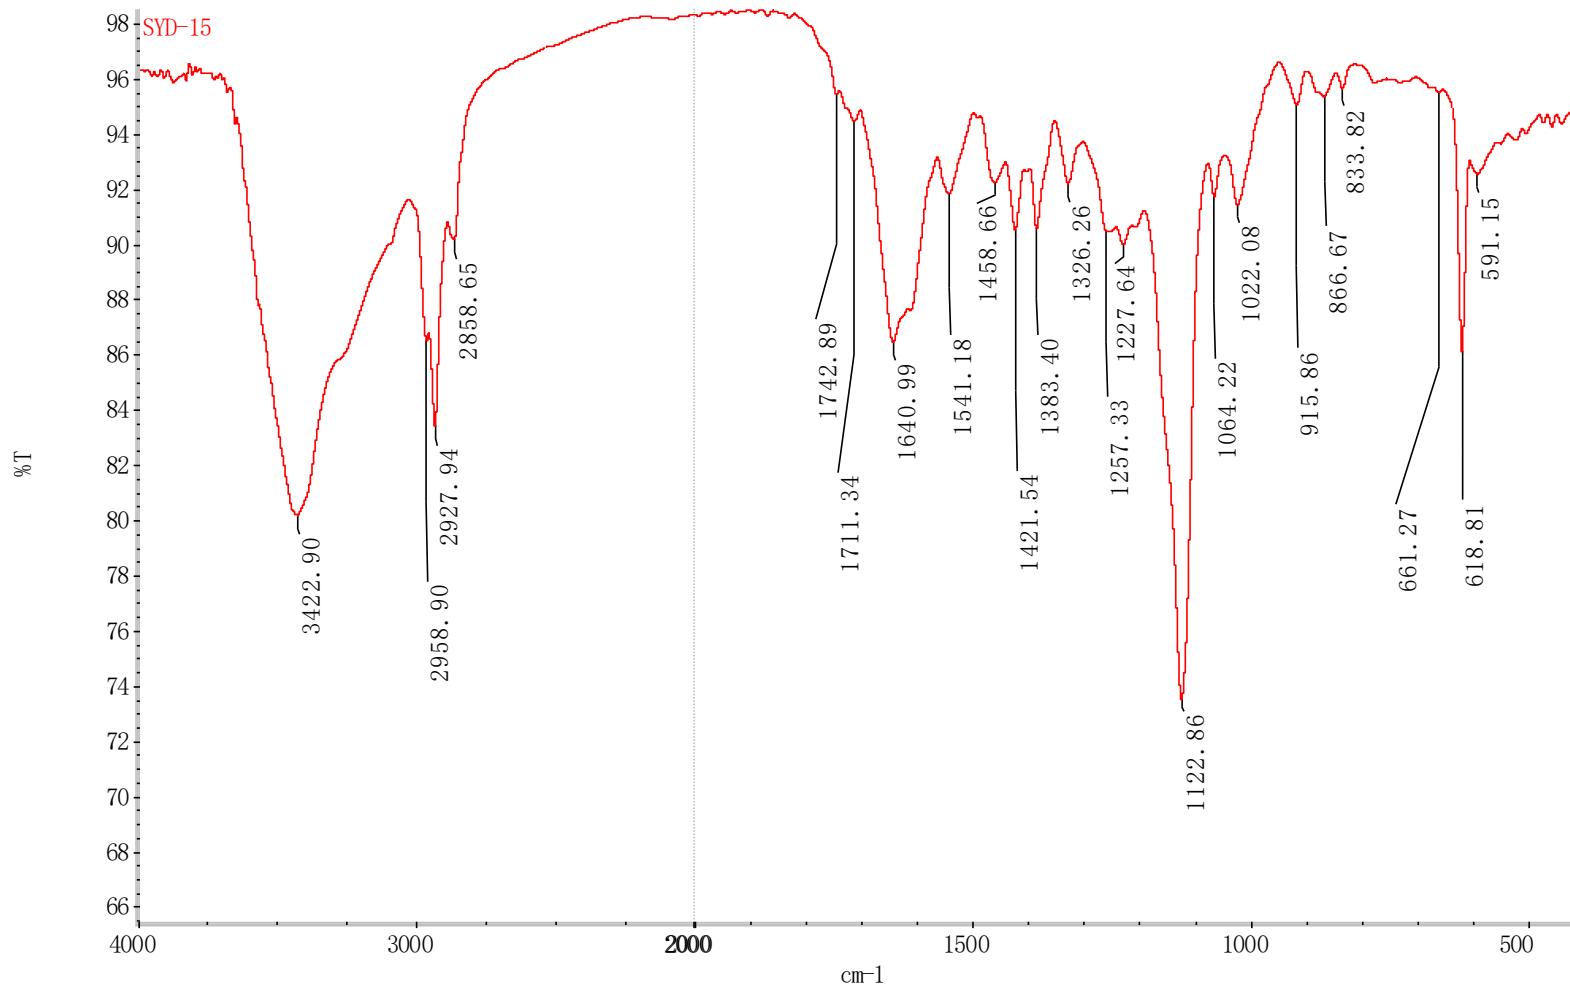

Fig. S24 IR spectrum of compound 2.

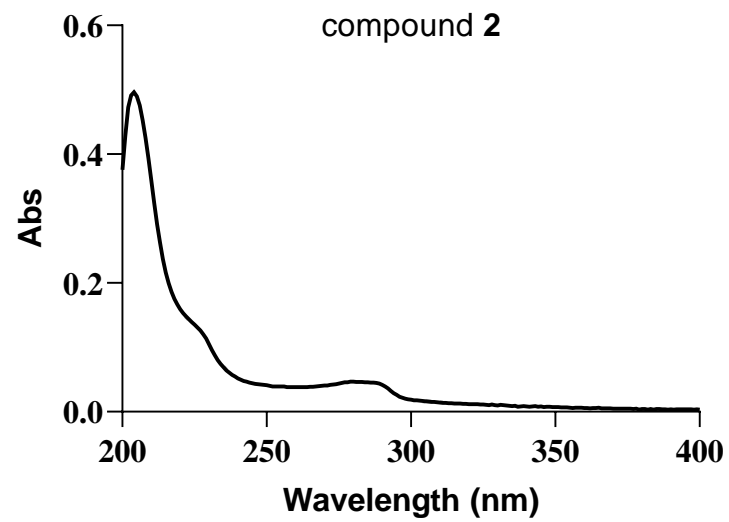

Fig. S25 UV spectrum of compound 2.

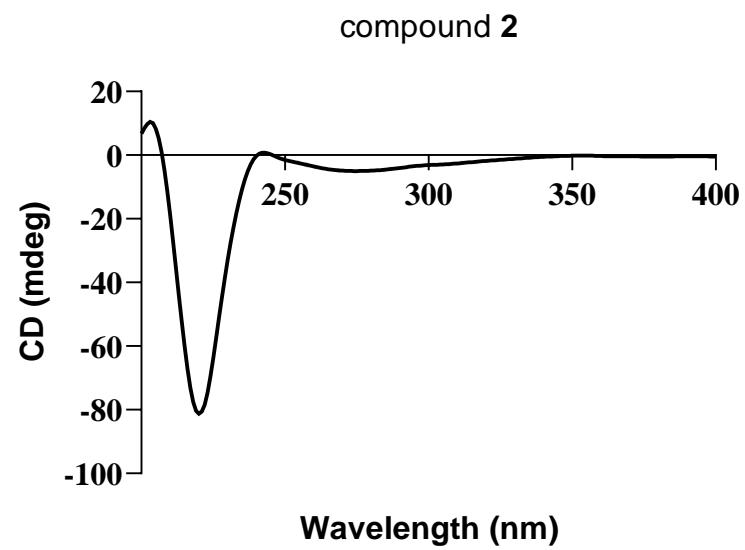

Fig. S26 CD spectrum of compound 2.

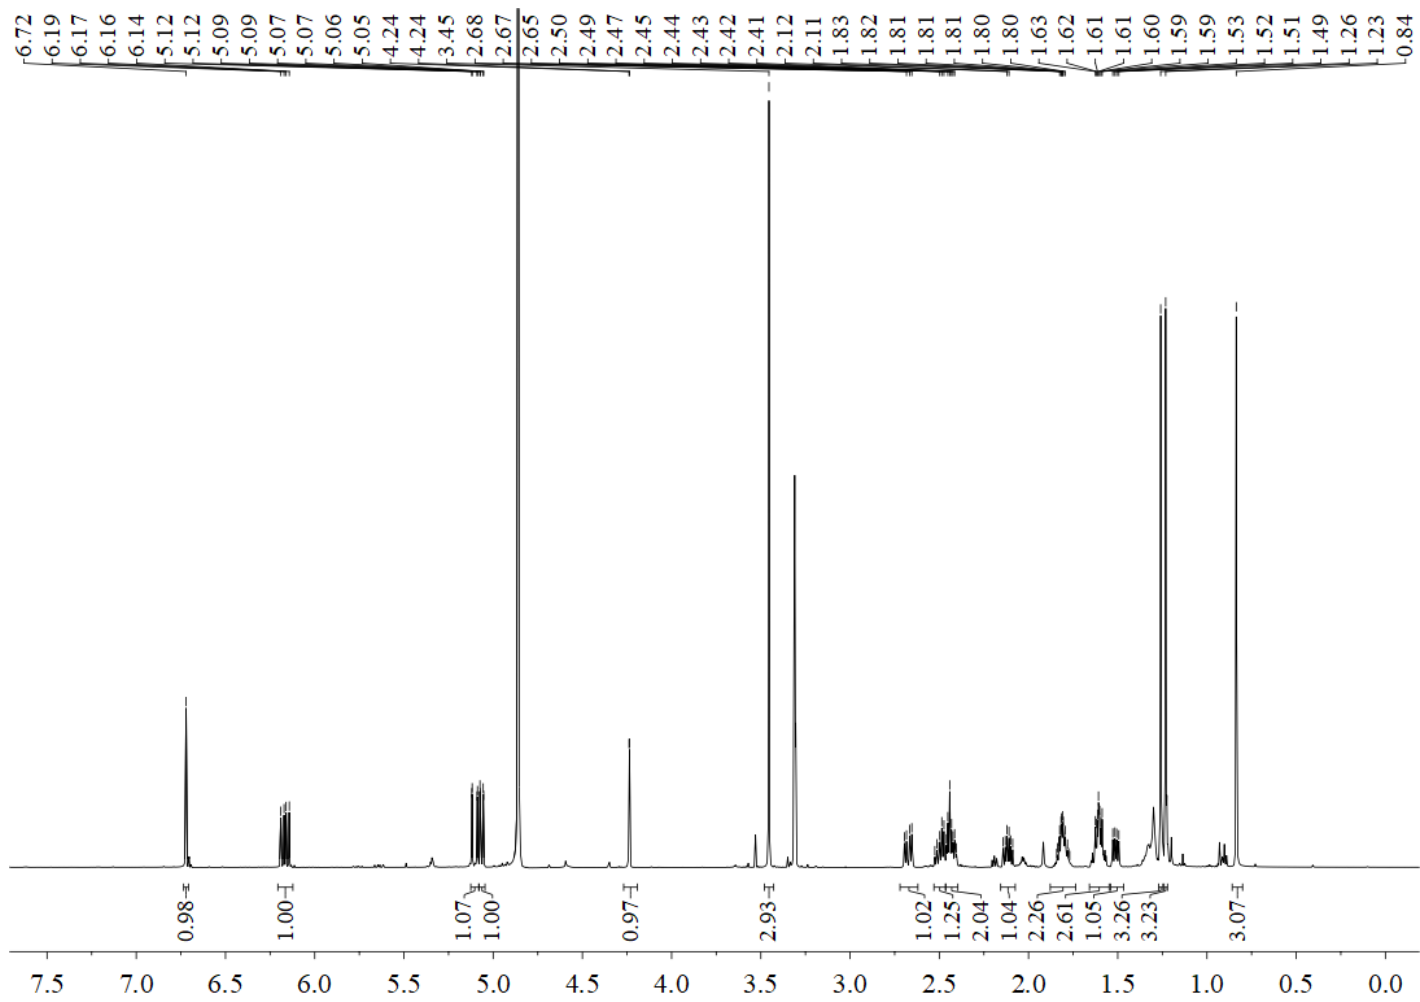

**Fig. S27**  $^1\text{H-NMR}$  (600 MHz,  $\text{CD}_3\text{OD}$ ) spectrum of compound **3**.



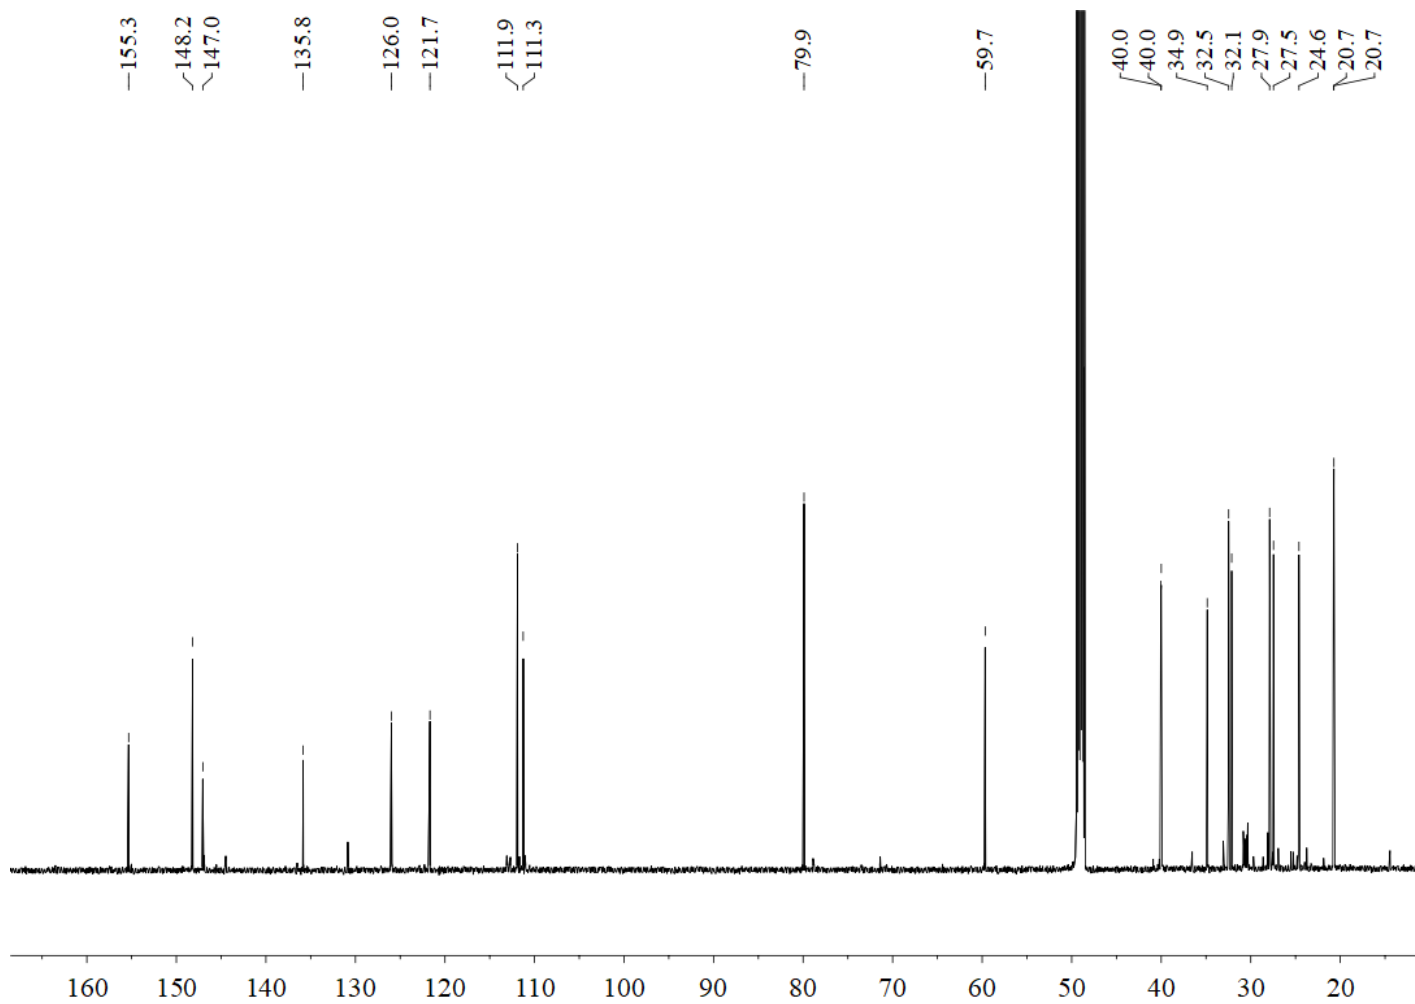

**Fig. S28**  $^{13}\text{C}$ -NMR (150 MHz,  $\text{CD}_3\text{OD}$ ) spectrum of compound 3.

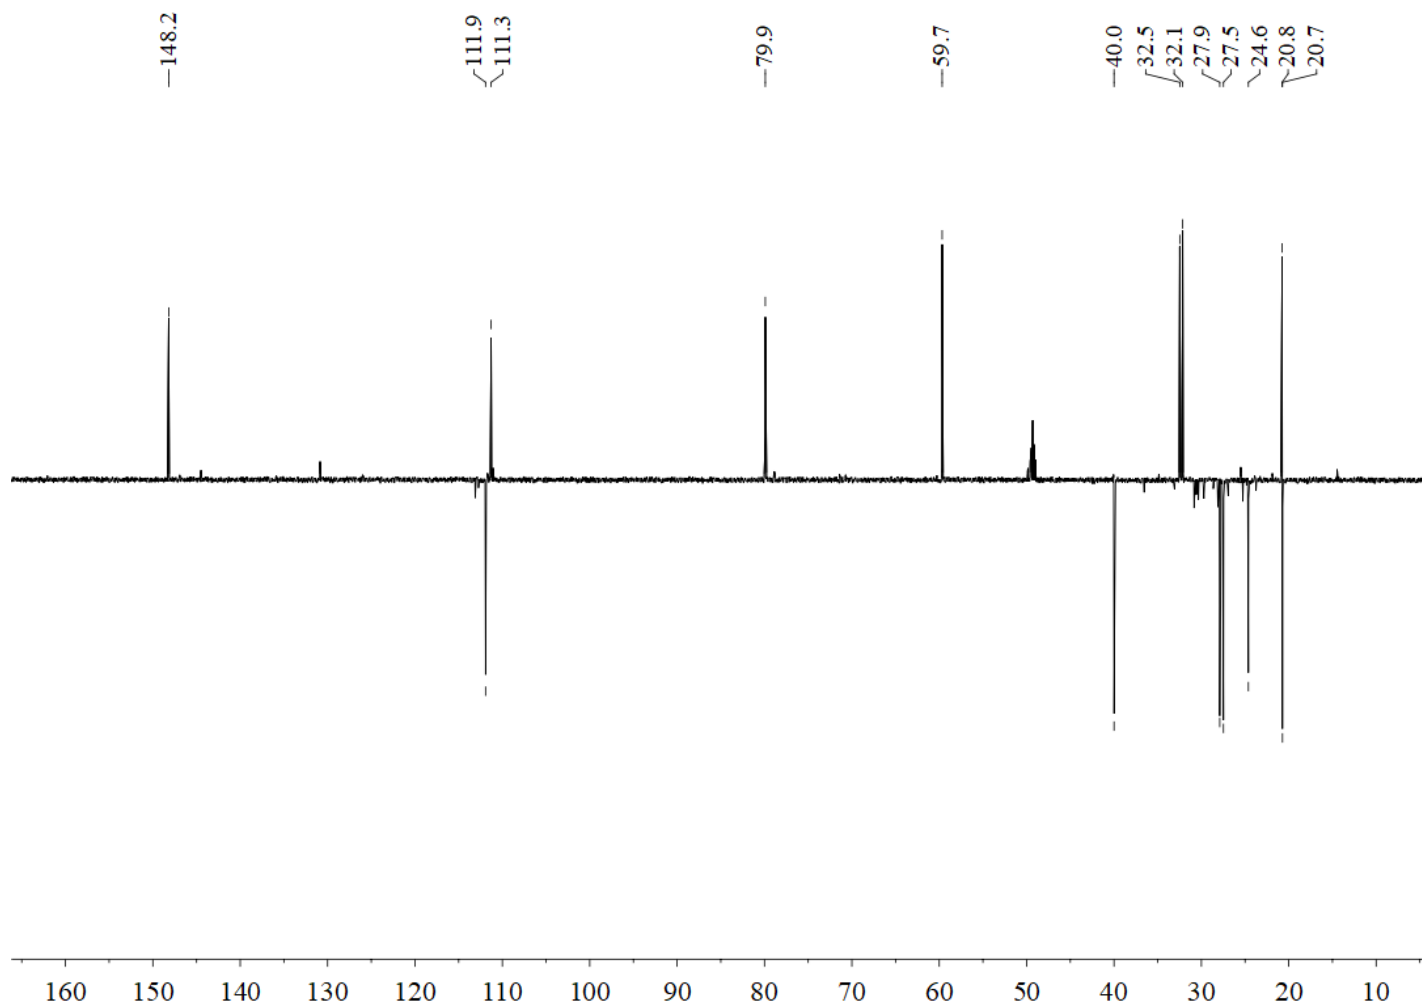

Fig. S29 DEPT-135 (150 MHz, CD<sub>3</sub>OD) spectrum of compound 3.

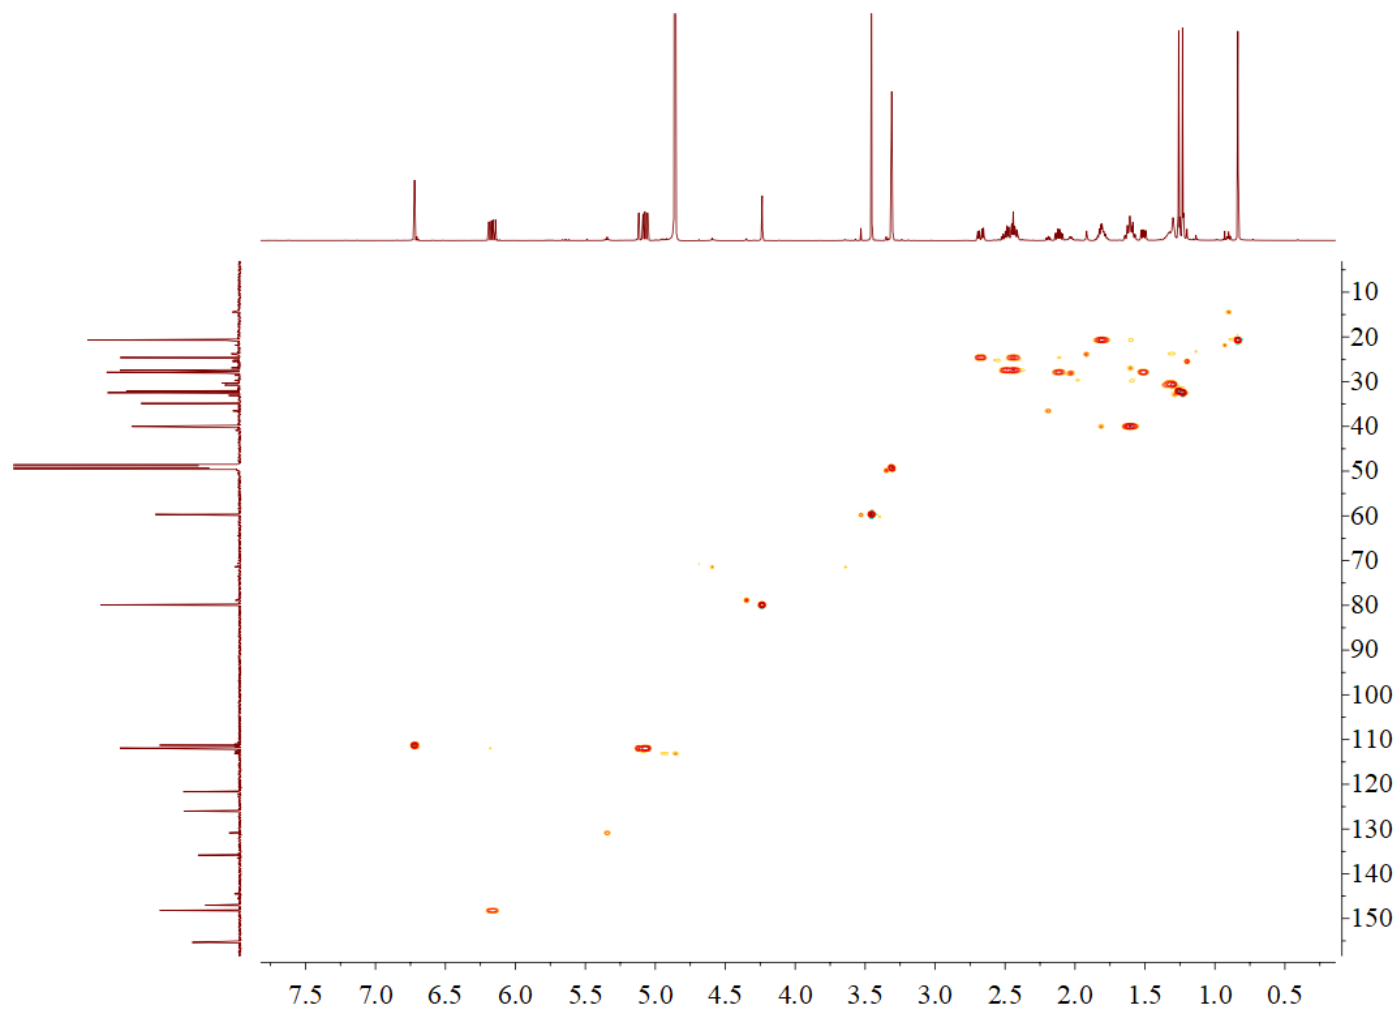

**Fig. S30** HSQC spectrum (CD<sub>3</sub>OD) of compound **3**.



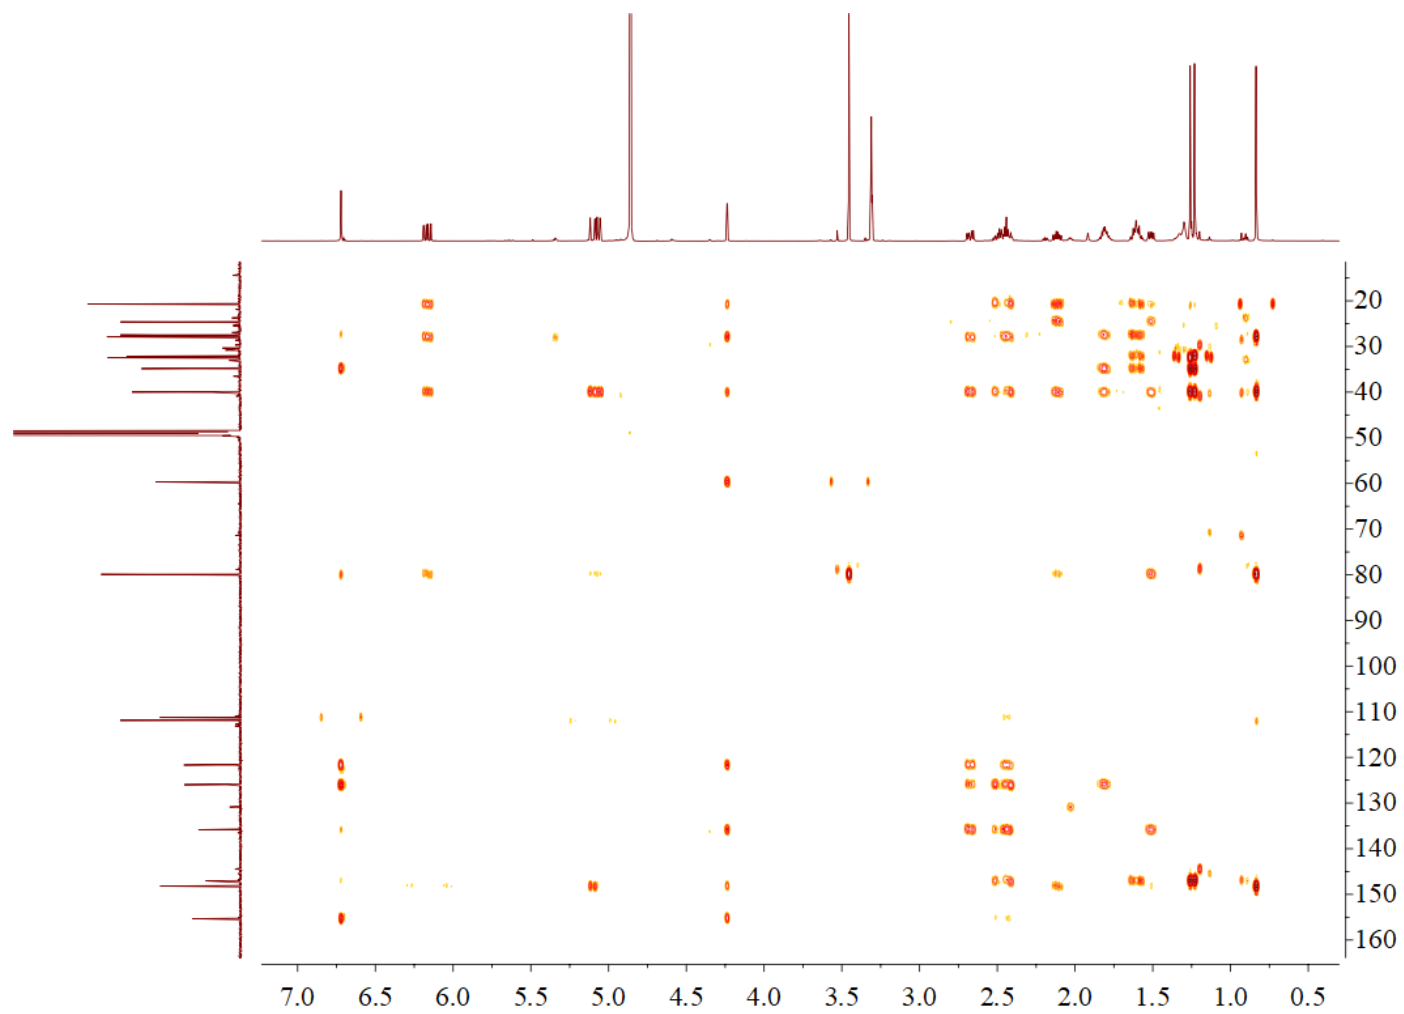

**Fig. S32** HMBC spectrum (CD<sub>3</sub>OD) of compound **3**.

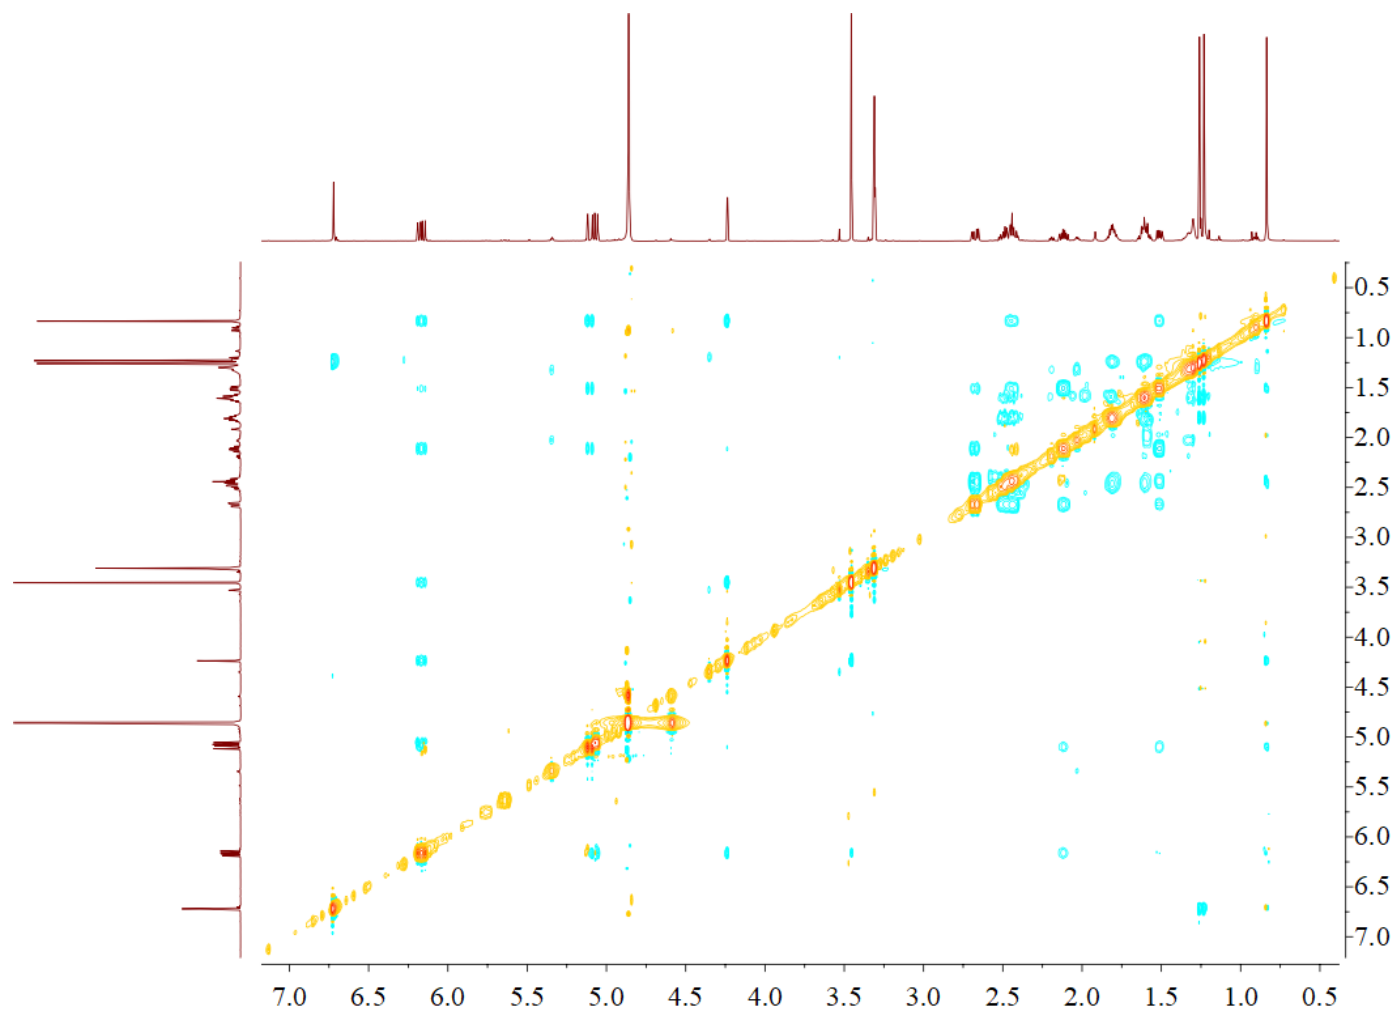

**Fig. S33** NOESY spectrum (CD<sub>3</sub>OD) of compound **3**.

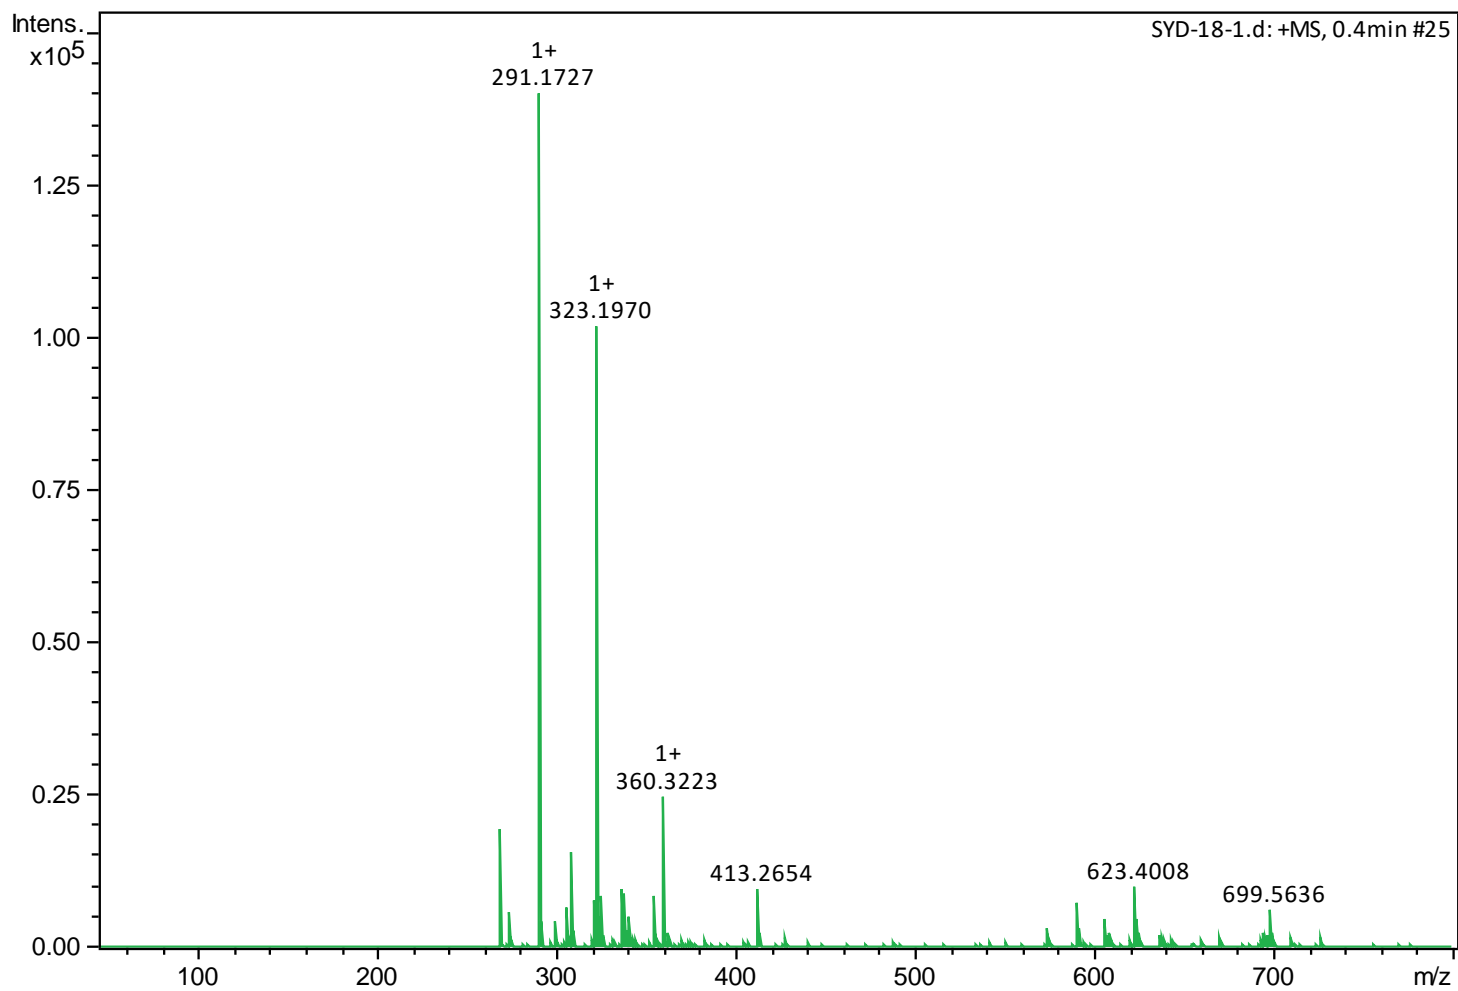

Fig. S34 HRTOFMS spectrum of compound 3.

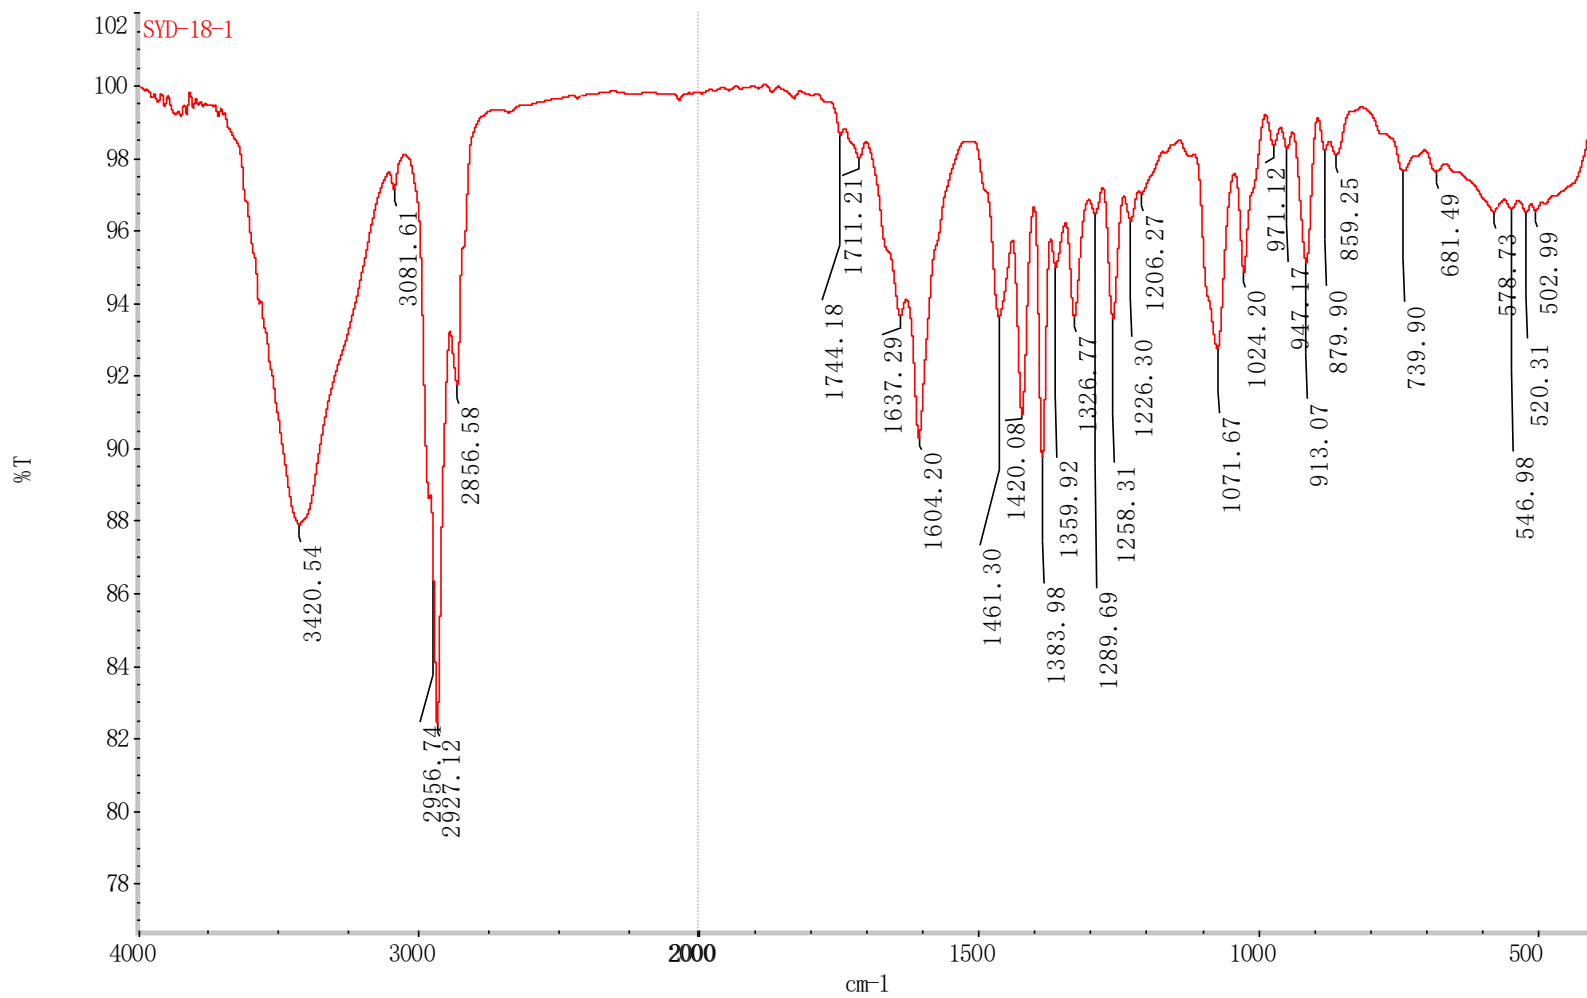

Fig. S35 IR spectrum of compound 3.



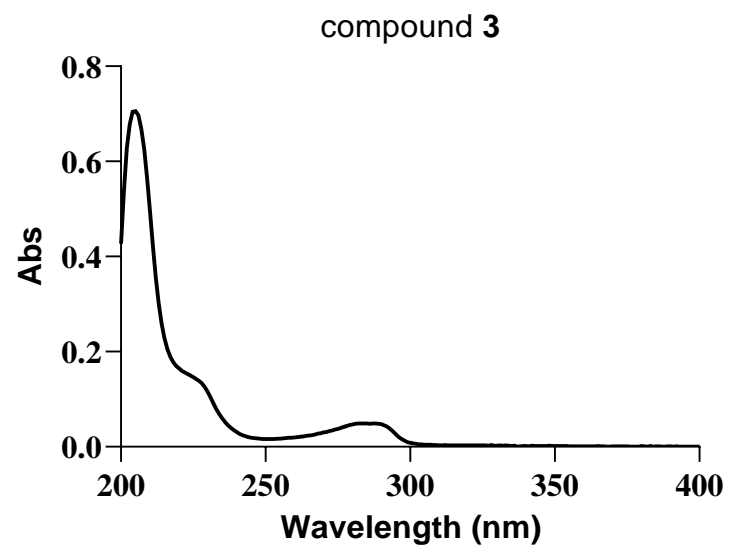

Fig. S36 UV spectrum of compound 3.

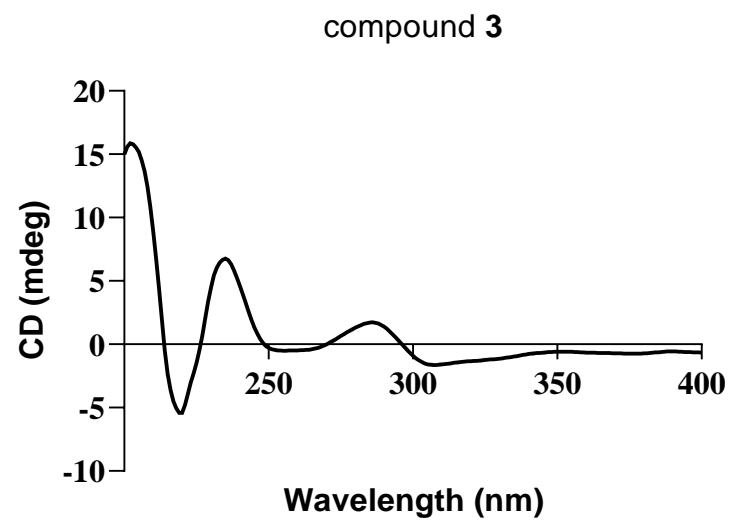

Fig. S37 CD spectrum of compound 3.

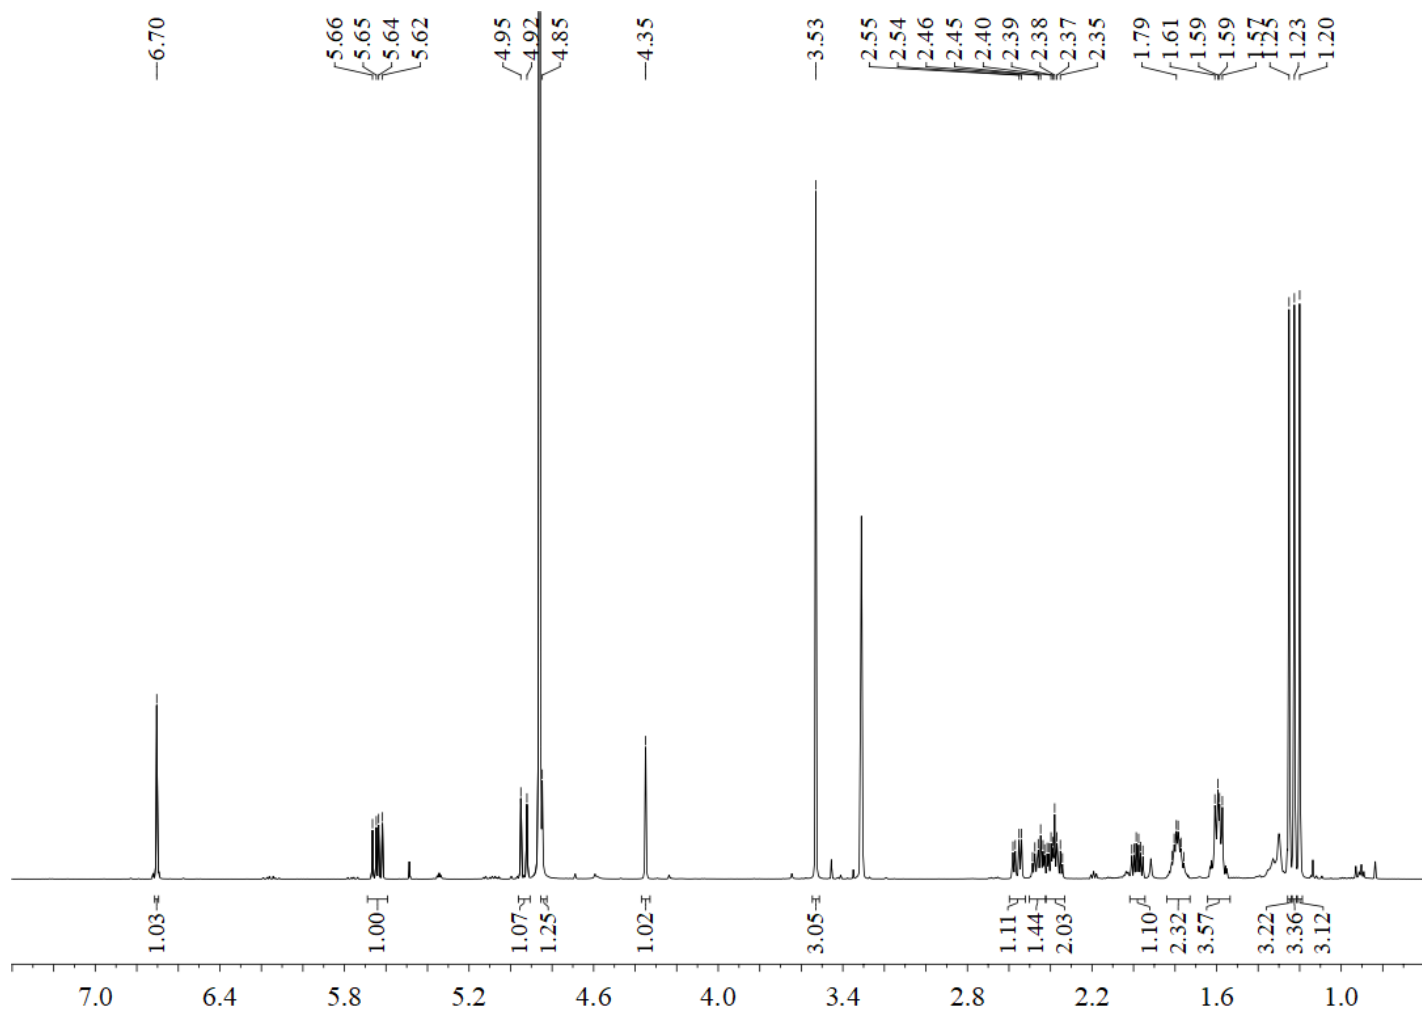

**Fig. S38**  $^1\text{H-NMR}$  (600 MHz,  $\text{CD}_3\text{OD}$ ) spectrum of compound 4.

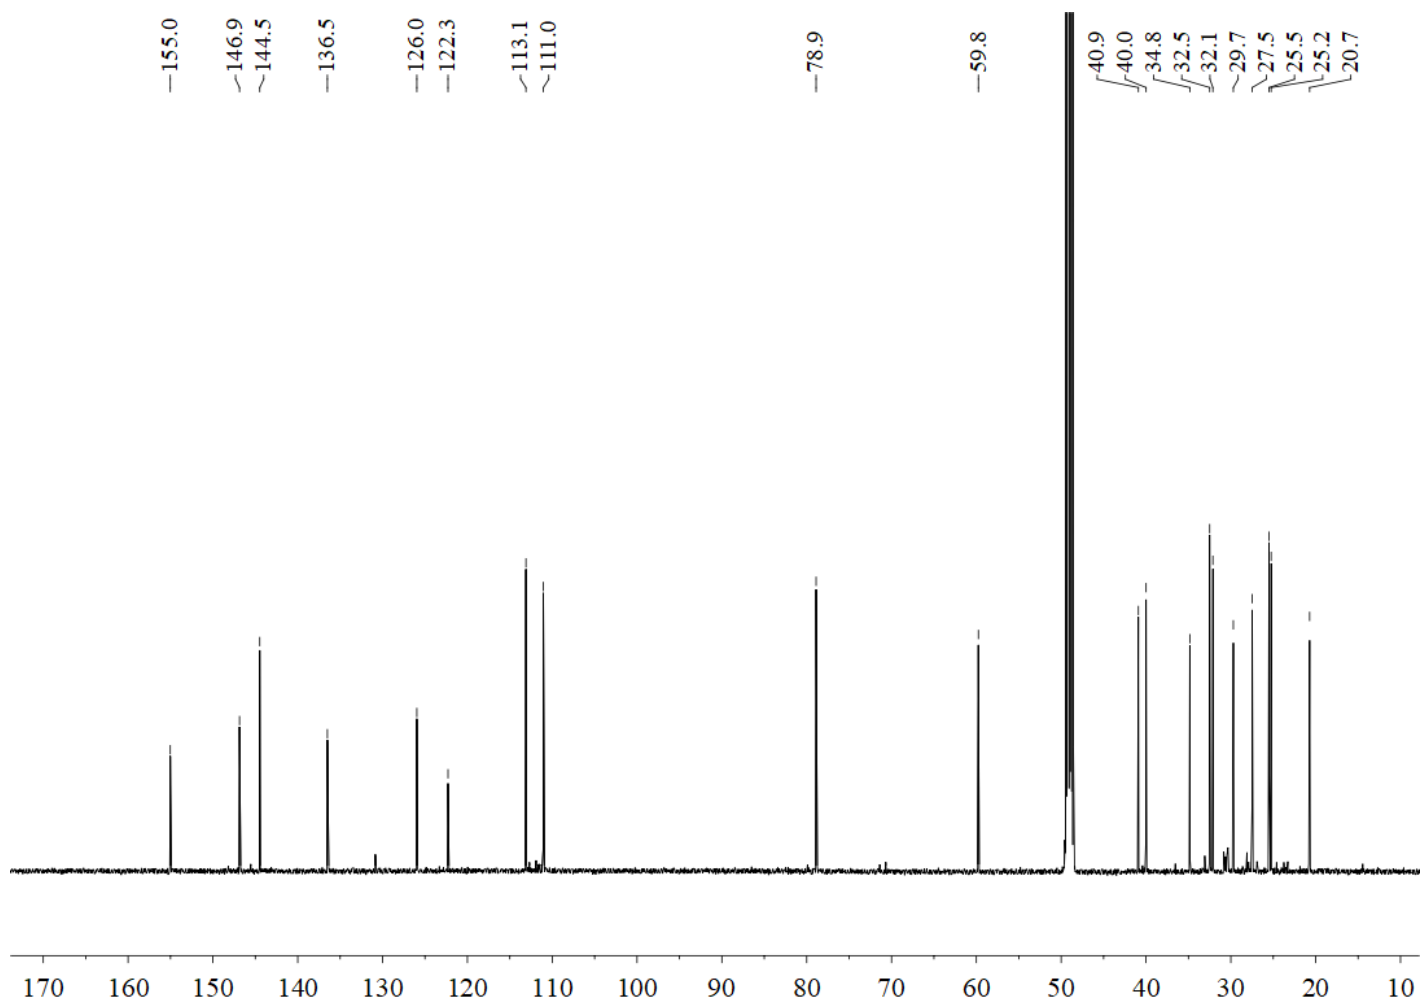

Fig. S39  $^{13}\text{C}$ -NMR (150 MHz,  $\text{CD}_3\text{OD}$ ) spectrum of compound 4.

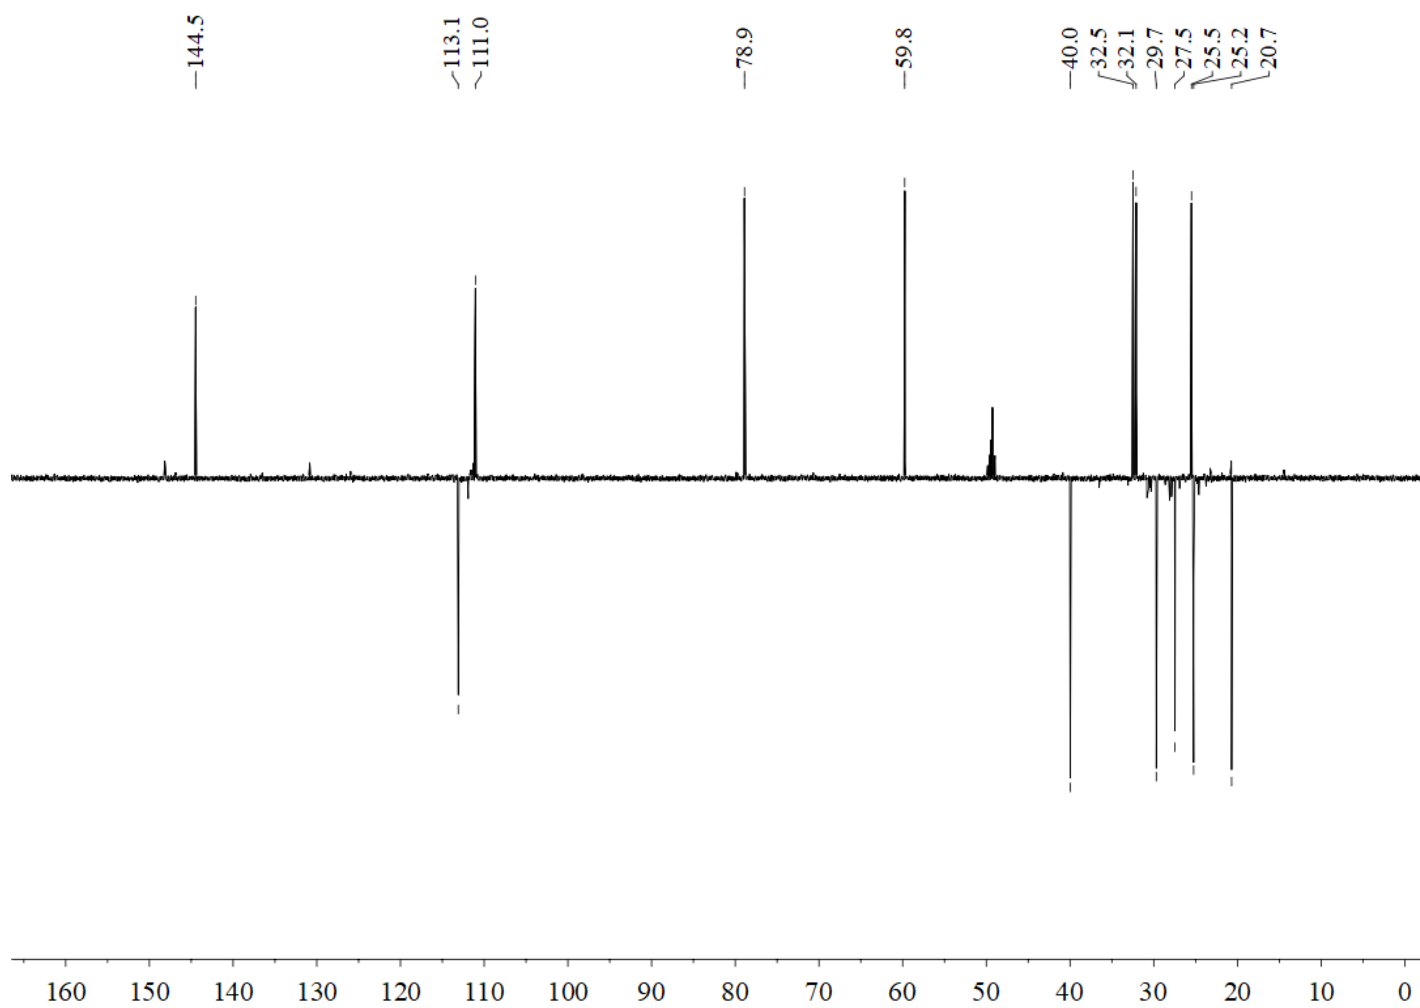

**Fig. S40** DEPT-135 (150 MHz, CD<sub>3</sub>OD) spectrum of compound **4**.

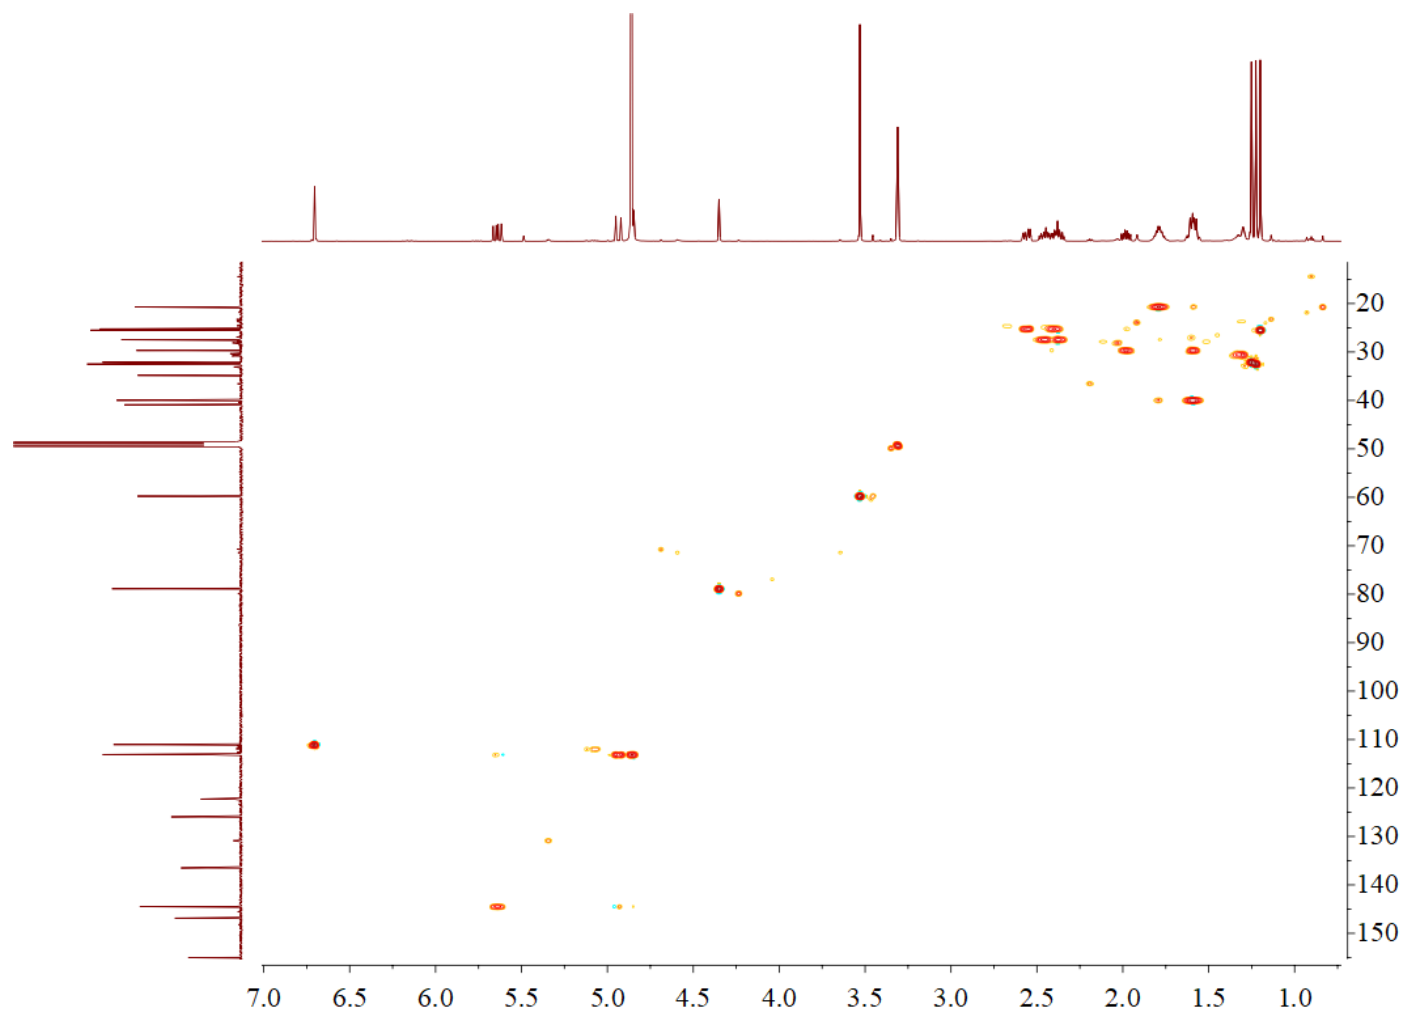

**Fig. S41** HSQC spectrum (CD<sub>3</sub>OD) of compound **4**.

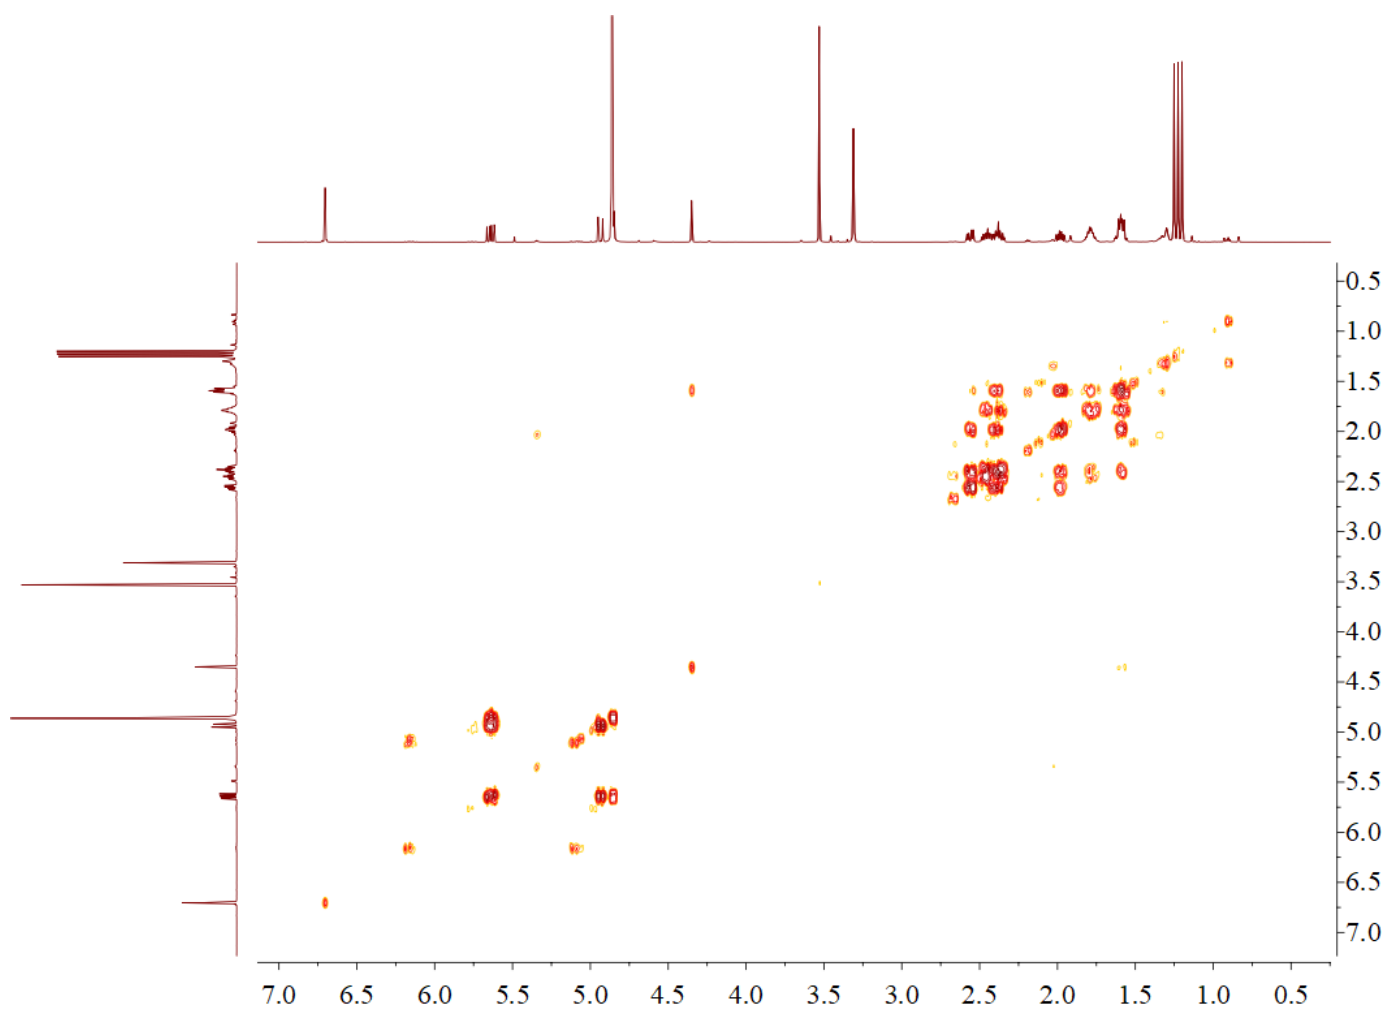

**Fig. S42**  $^1\text{H}$ - $^1\text{H}$  COSY spectrum ( $\text{CD}_3\text{OD}$ ) of compound 4.

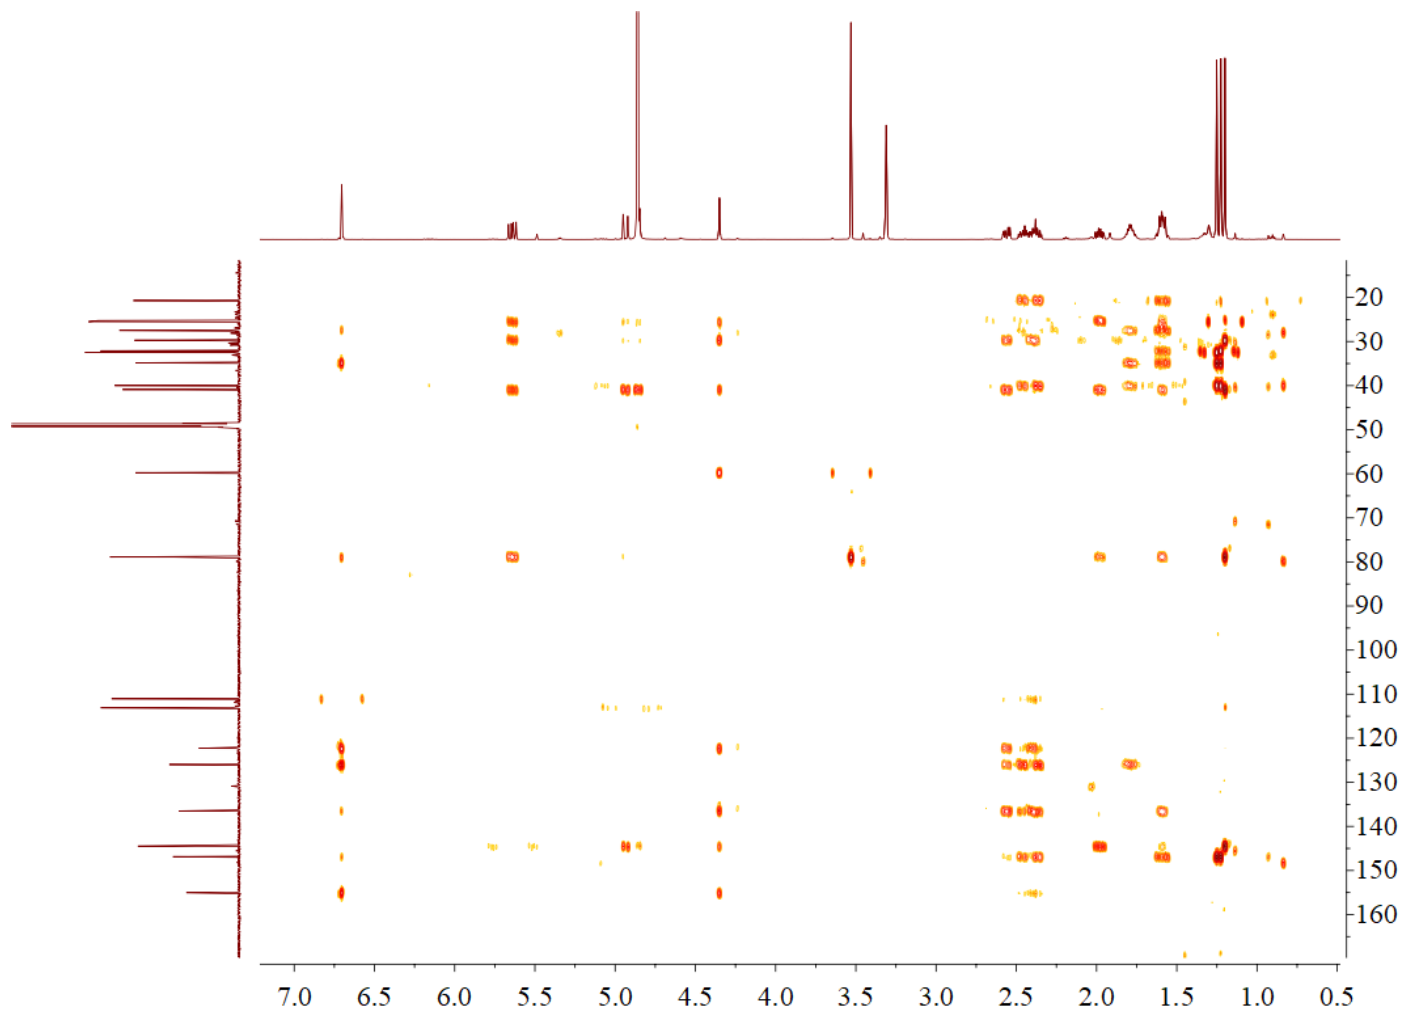

**Fig. S43** HMBC spectrum (CD<sub>3</sub>OD) of compound **4**.



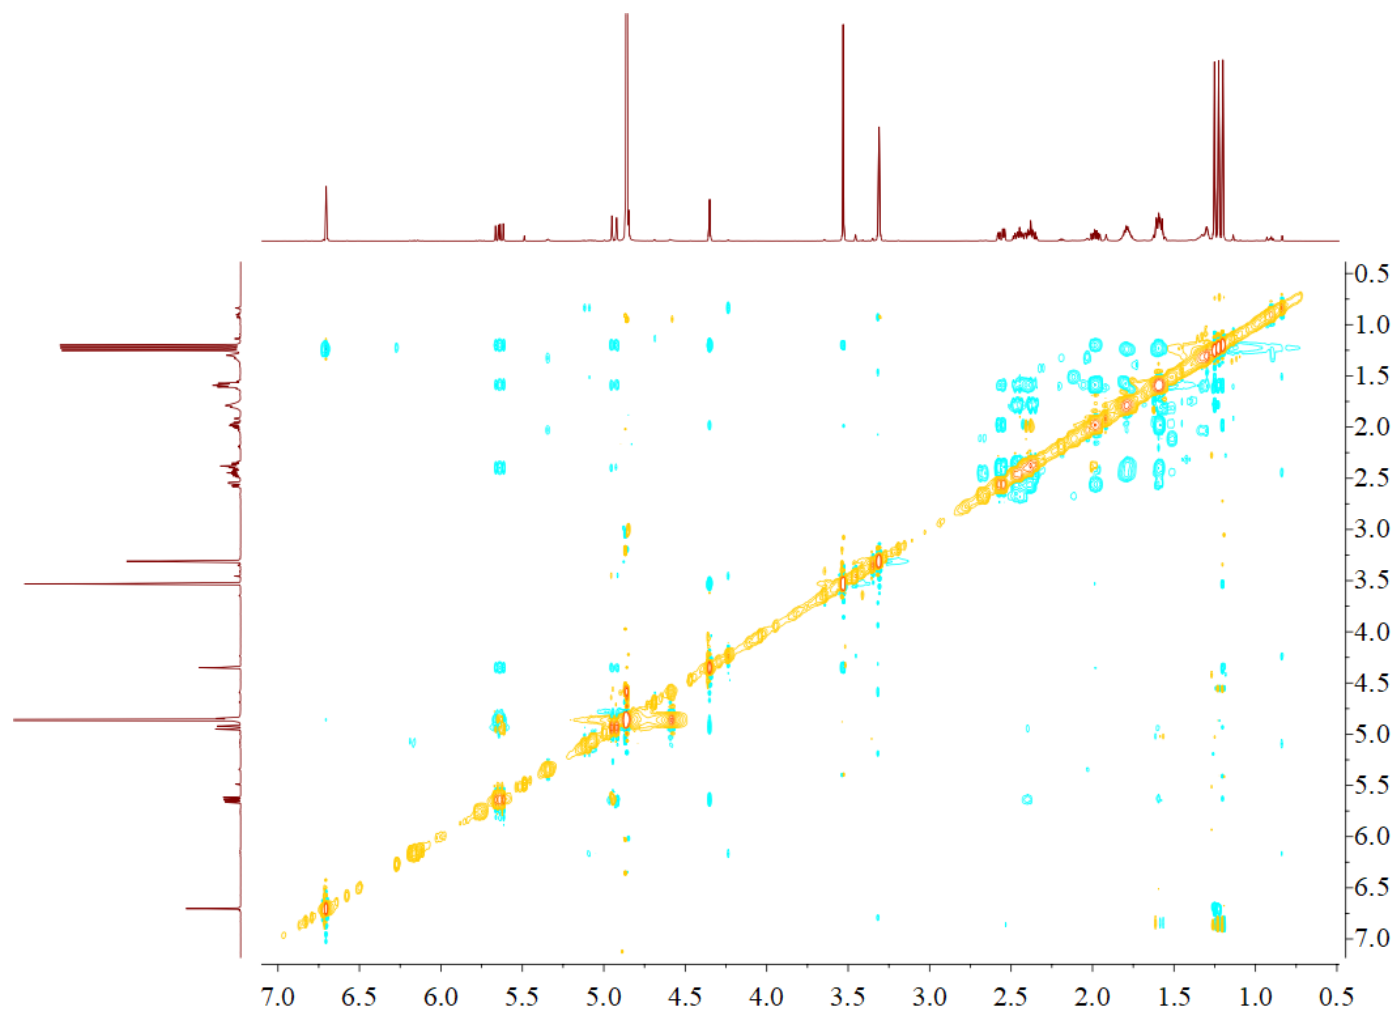

**Fig. S44** NOESY spectrum (CD<sub>3</sub>OD) of compound **4**.

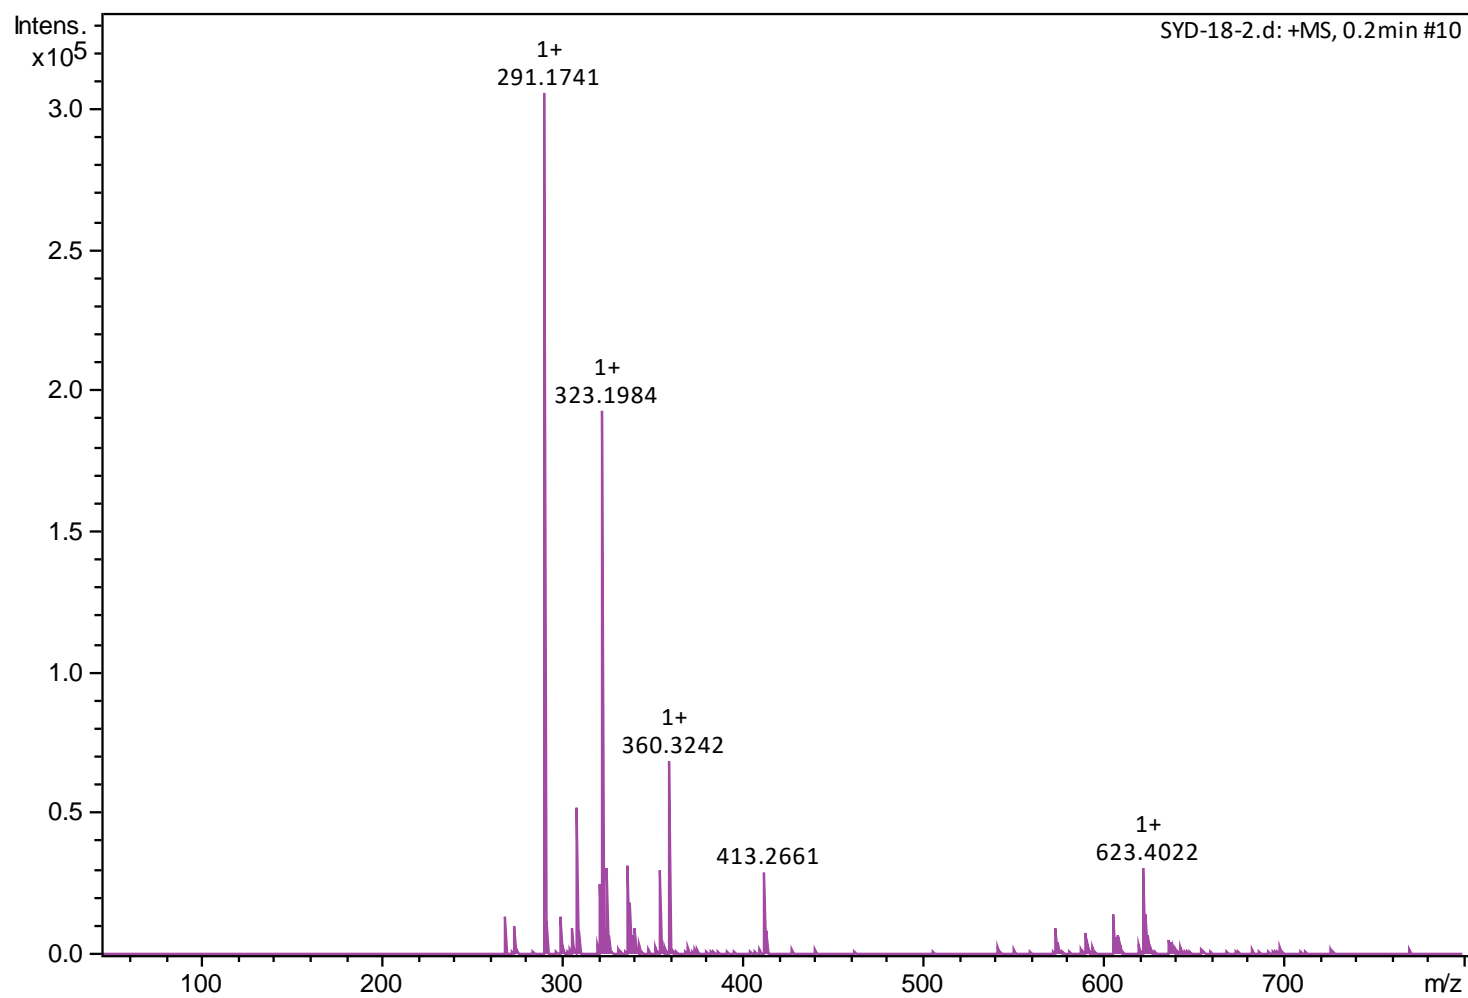

Fig. S45 HRTOFMS spectrum of compound 4.

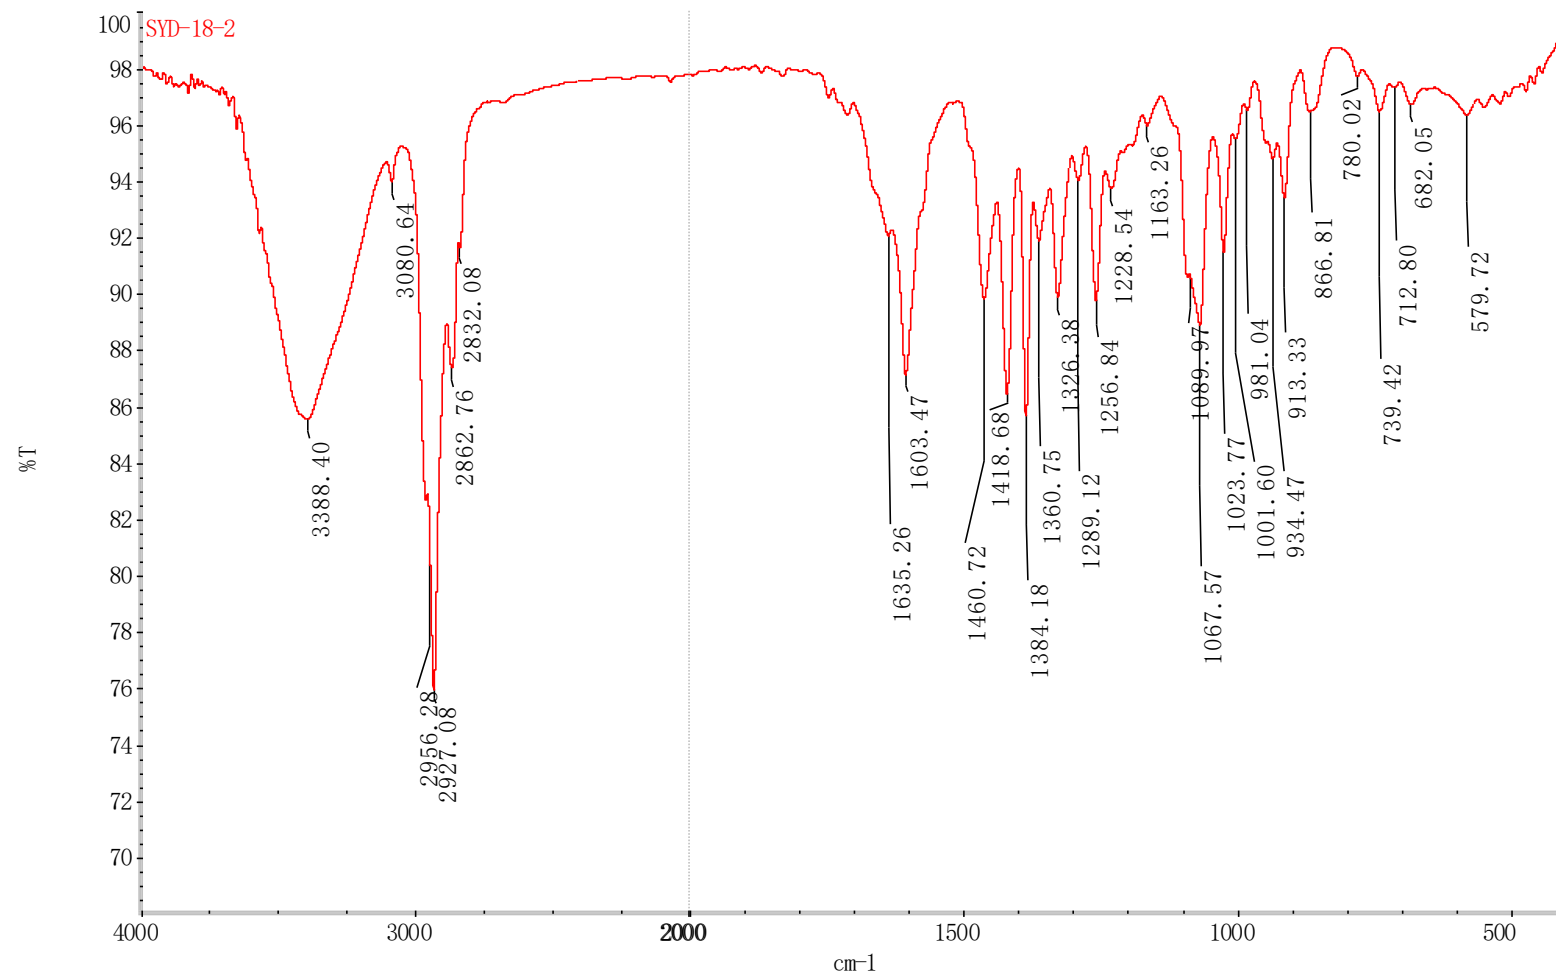

Fig. S46 IR spectrum of compound 4.

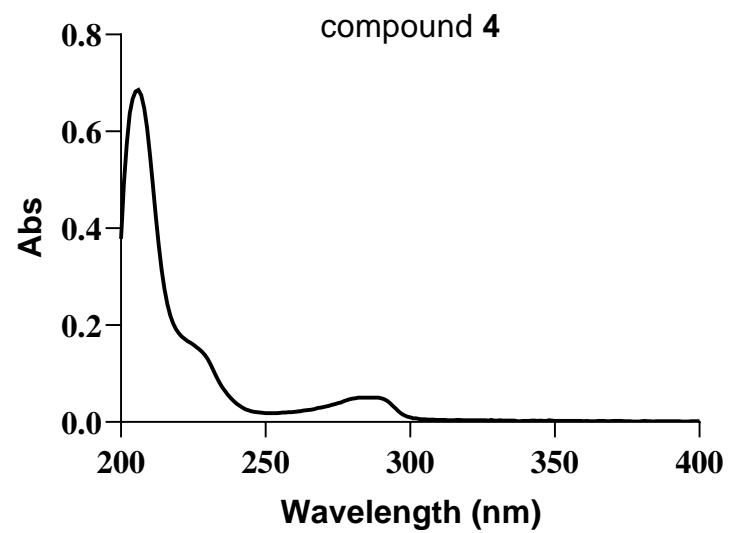

Fig. S47 UV spectrum of compound 4.

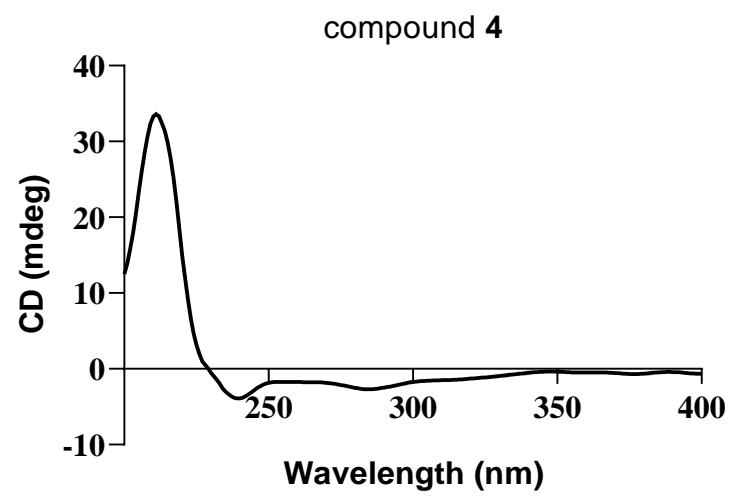

Fig. S48 CD spectrum of compound 4.

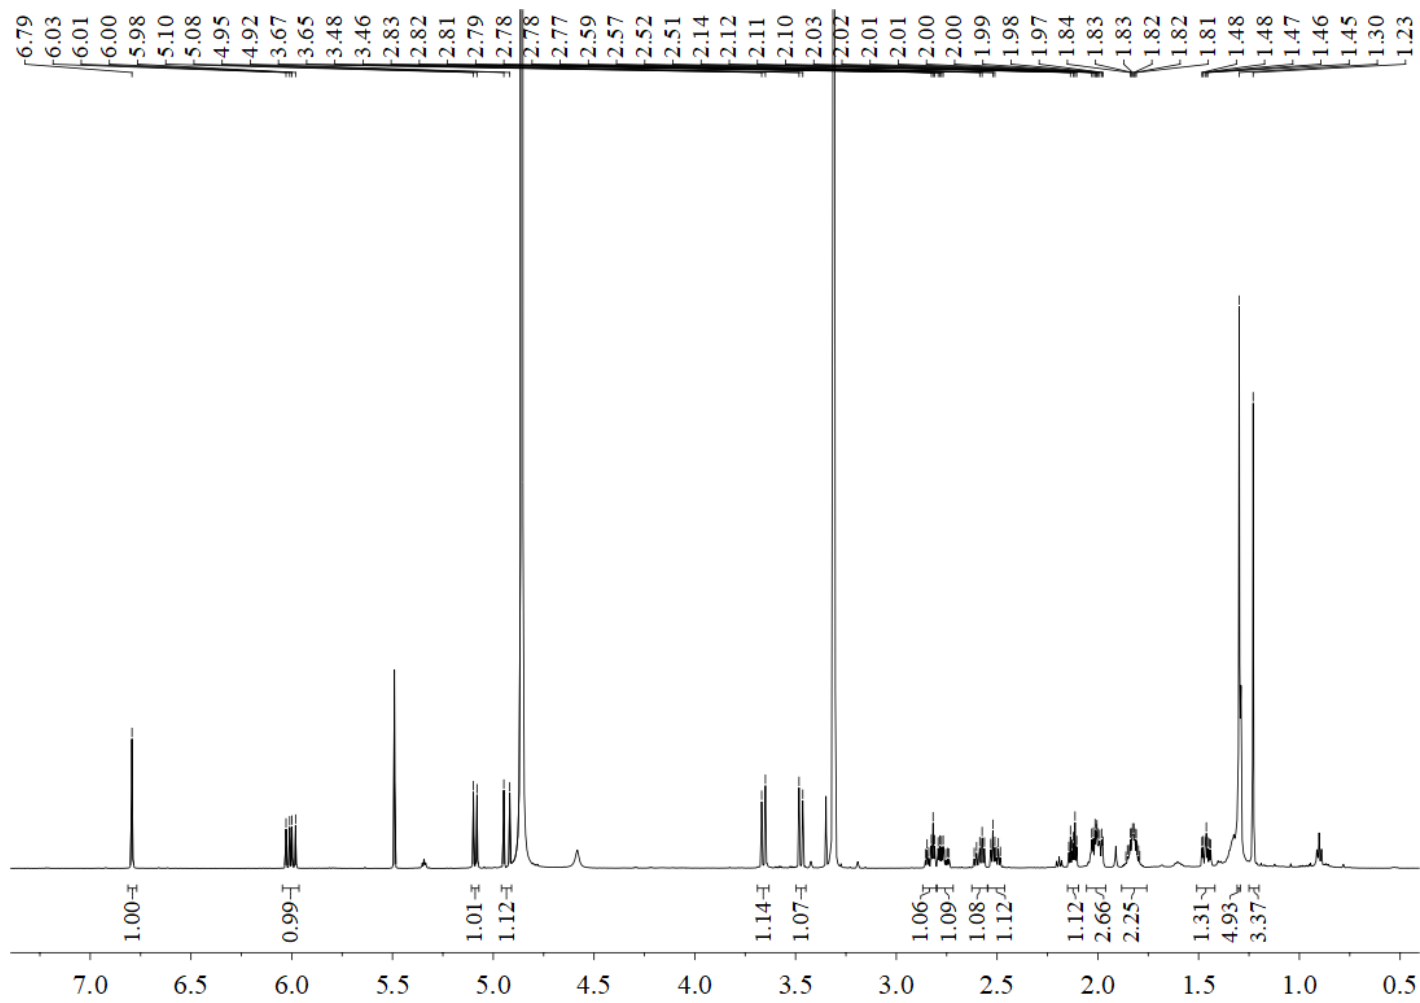

Fig. S49  $^1\text{H-NMR}$  (600 MHz,  $\text{CD}_3\text{OD}$ ) spectrum of compound 5.

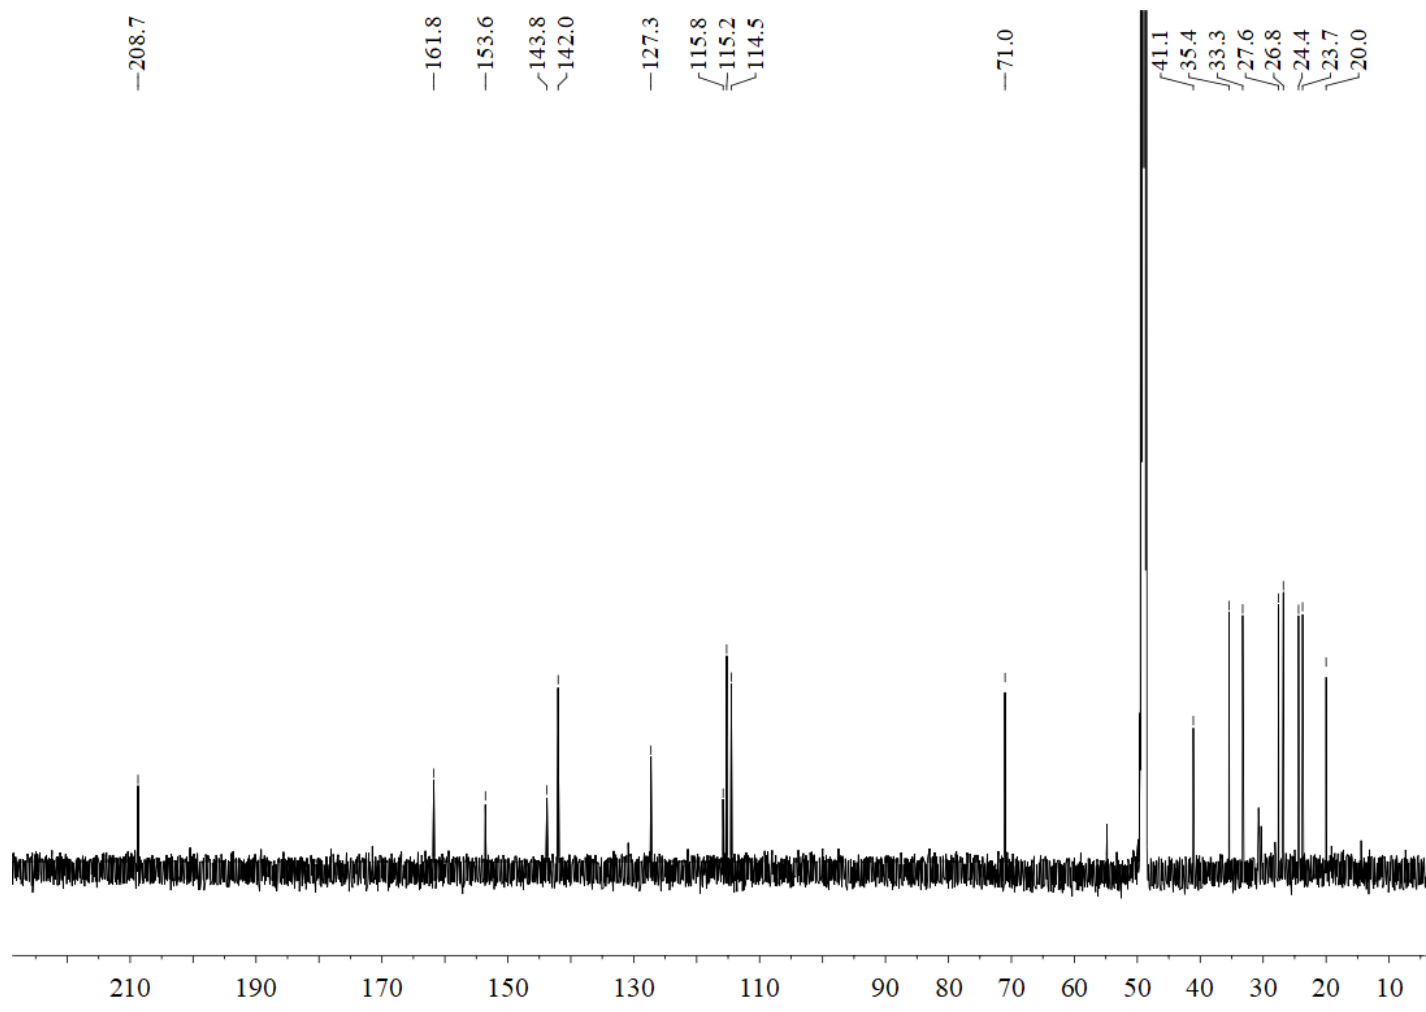

Fig. S50  $^{13}\text{C}$ -NMR (150 MHz,  $\text{CD}_3\text{OD}$ ) spectrum of compound 5.

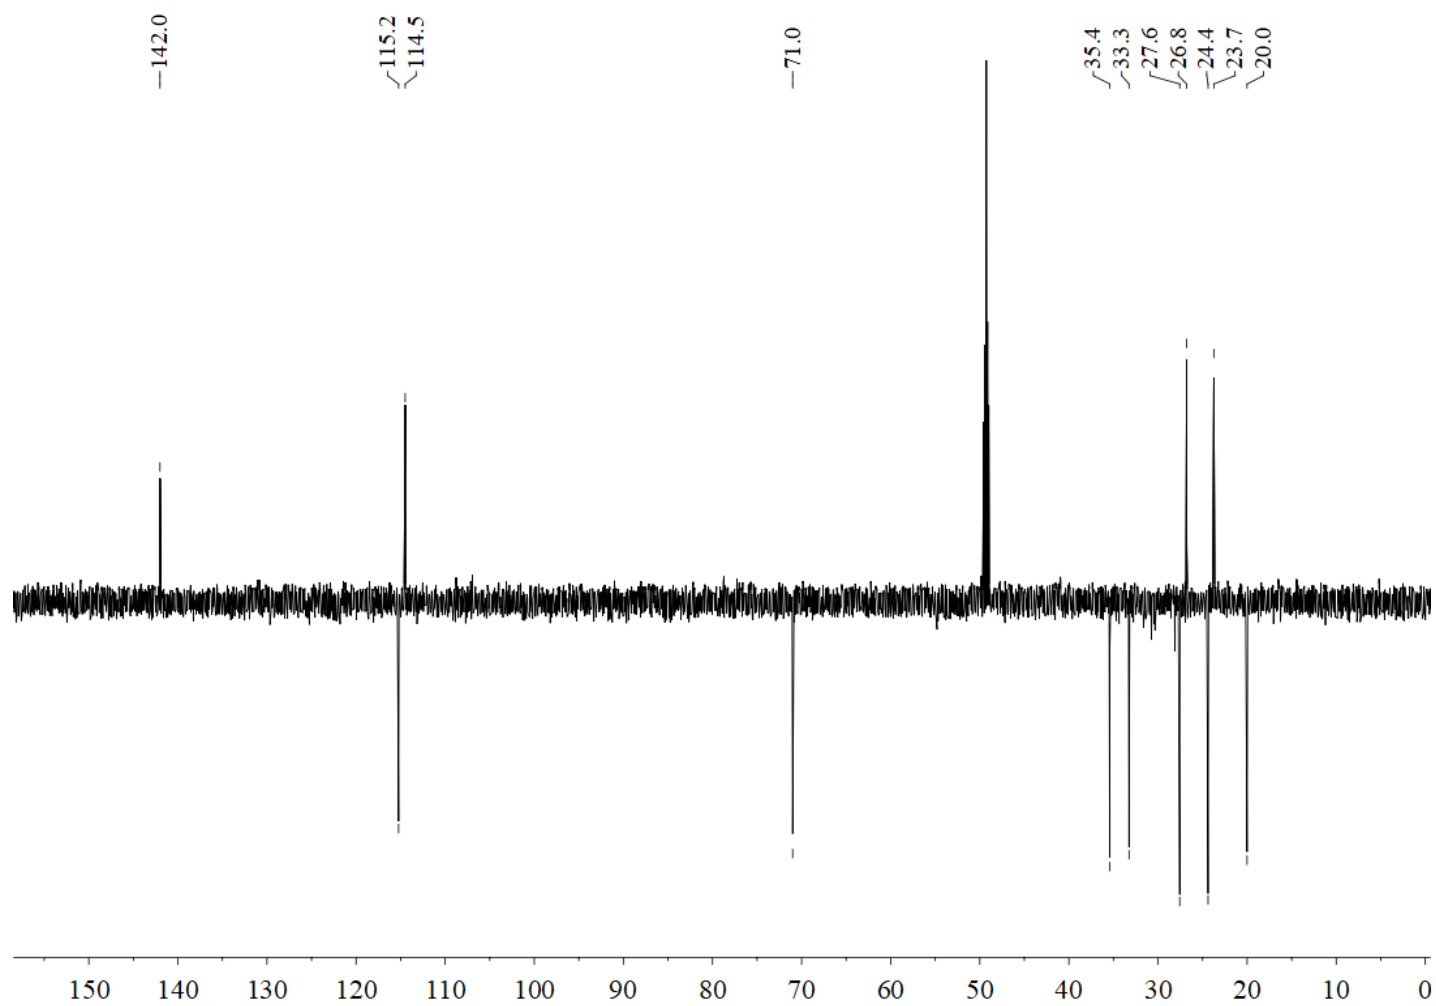

Fig. S51 DEPT-135 (150 MHz, CD<sub>3</sub>OD) spectrum of compound 5.



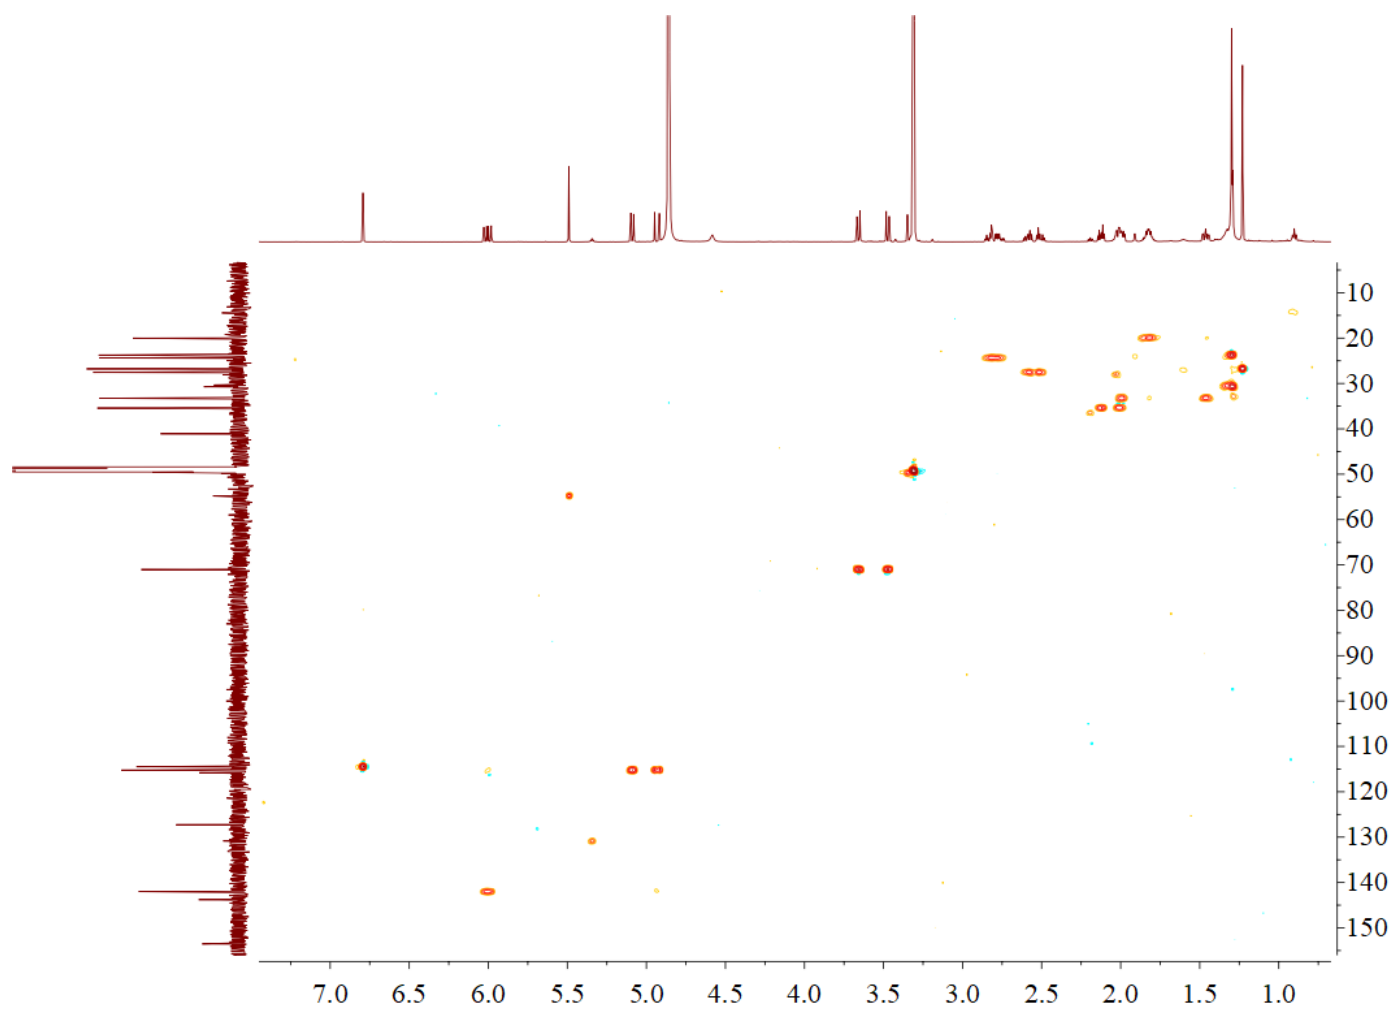

Fig. S52 HSQC spectrum (CD<sub>3</sub>OD) of compound 5.

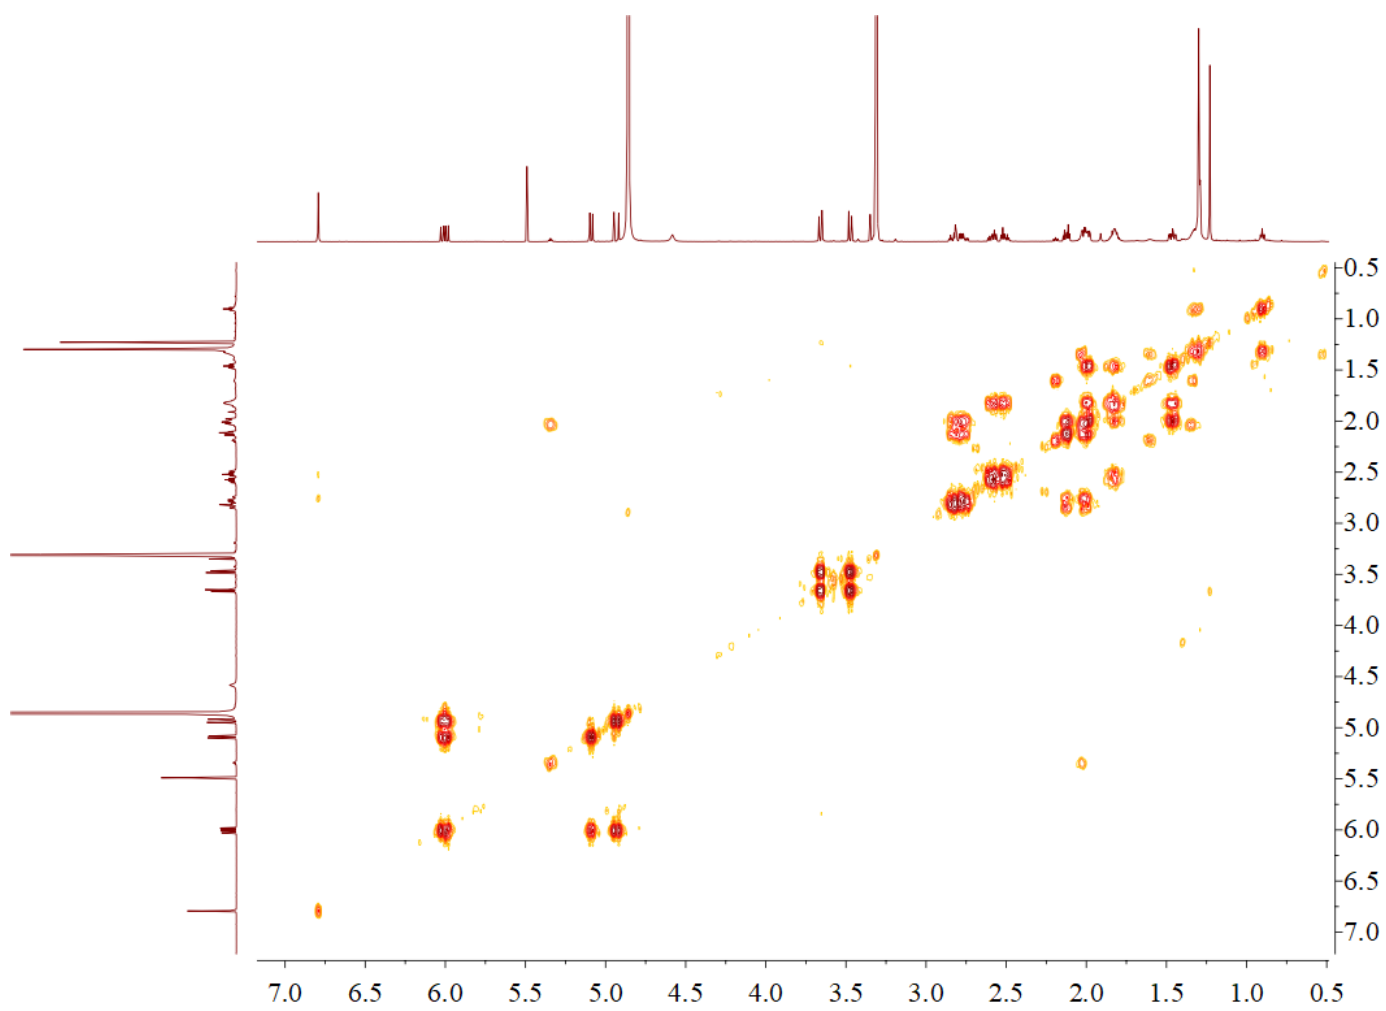

**Fig. S53**  $^1\text{H}$ - $^1\text{H}$  COSY spectrum ( $\text{CD}_3\text{OD}$ ) of compound 5.

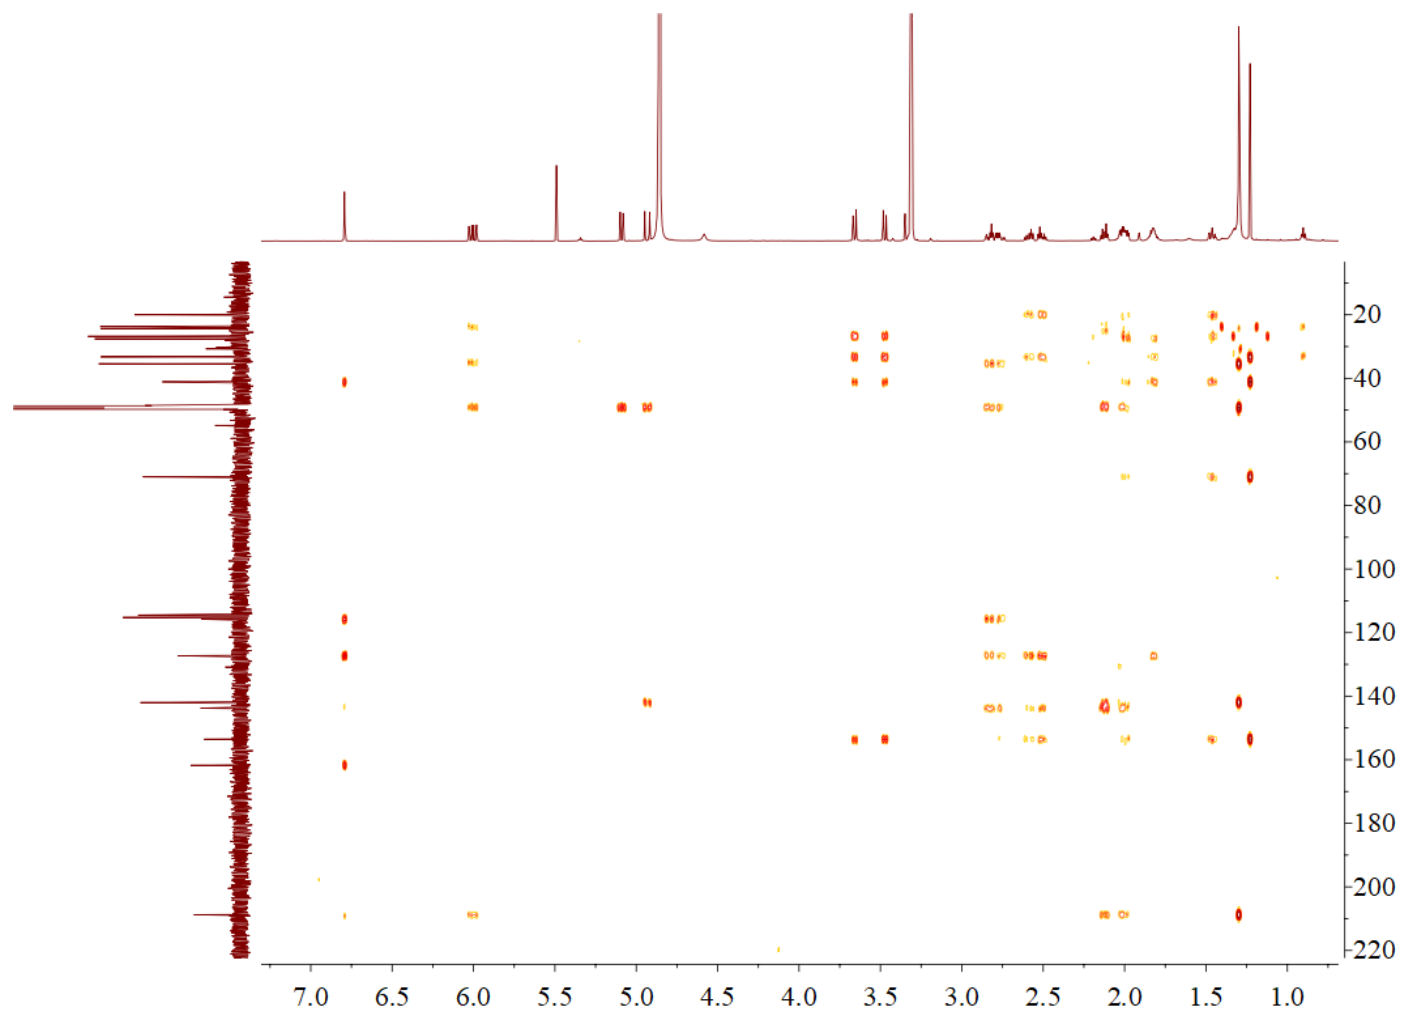

Fig. S54 HMBC spectrum (CD<sub>3</sub>OD) of compound 5.

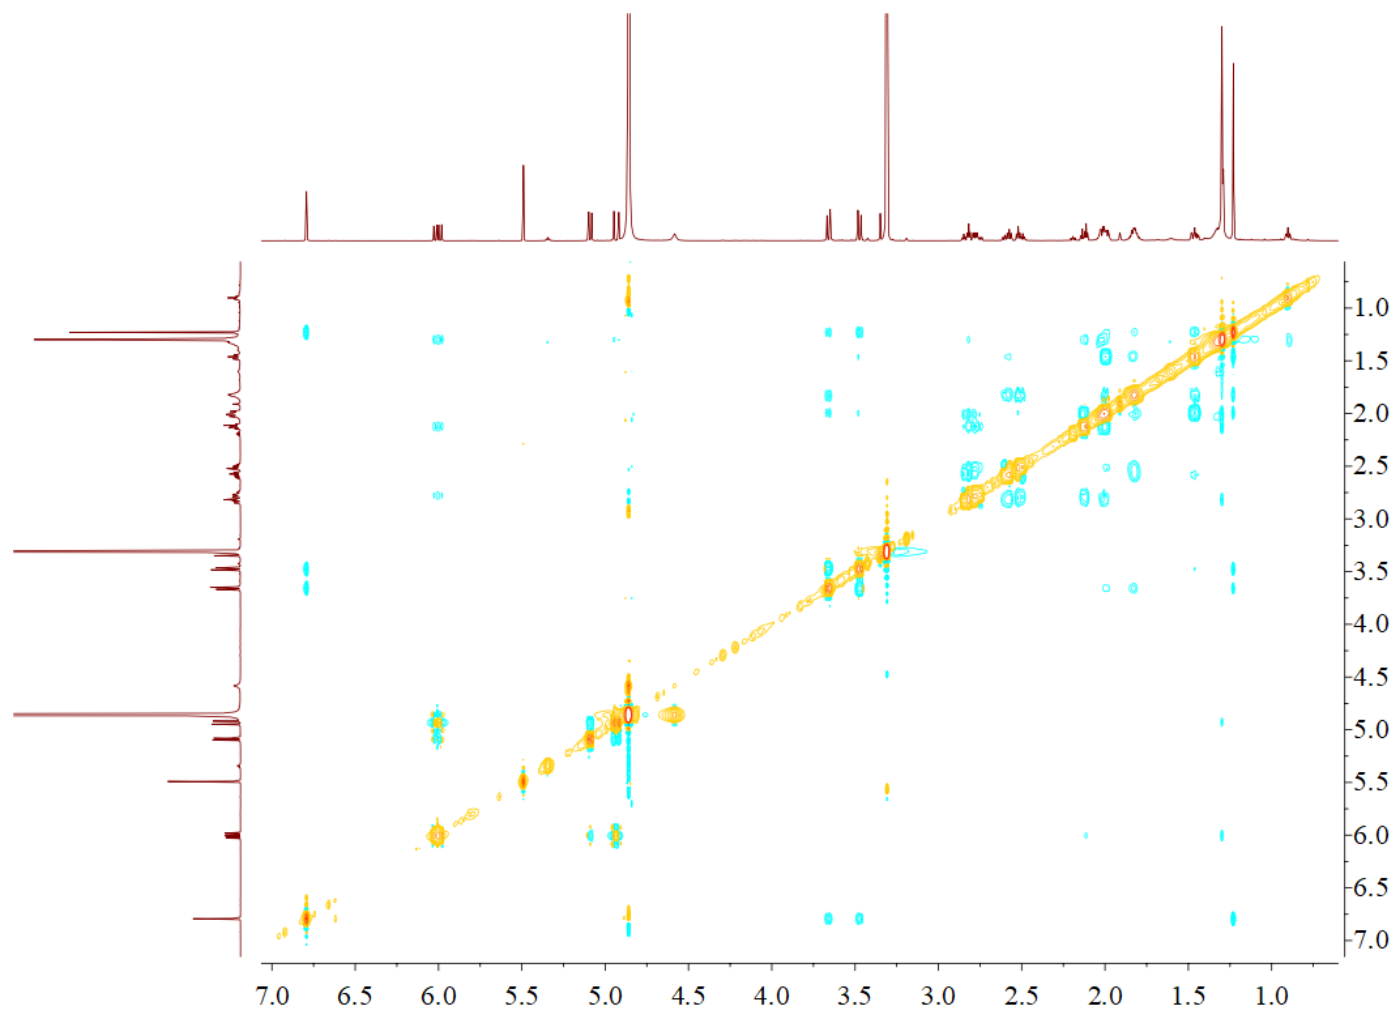

**Fig. S55** NOESY spectrum ( $\text{CD}_3\text{OD}$ ) of compound **5**.

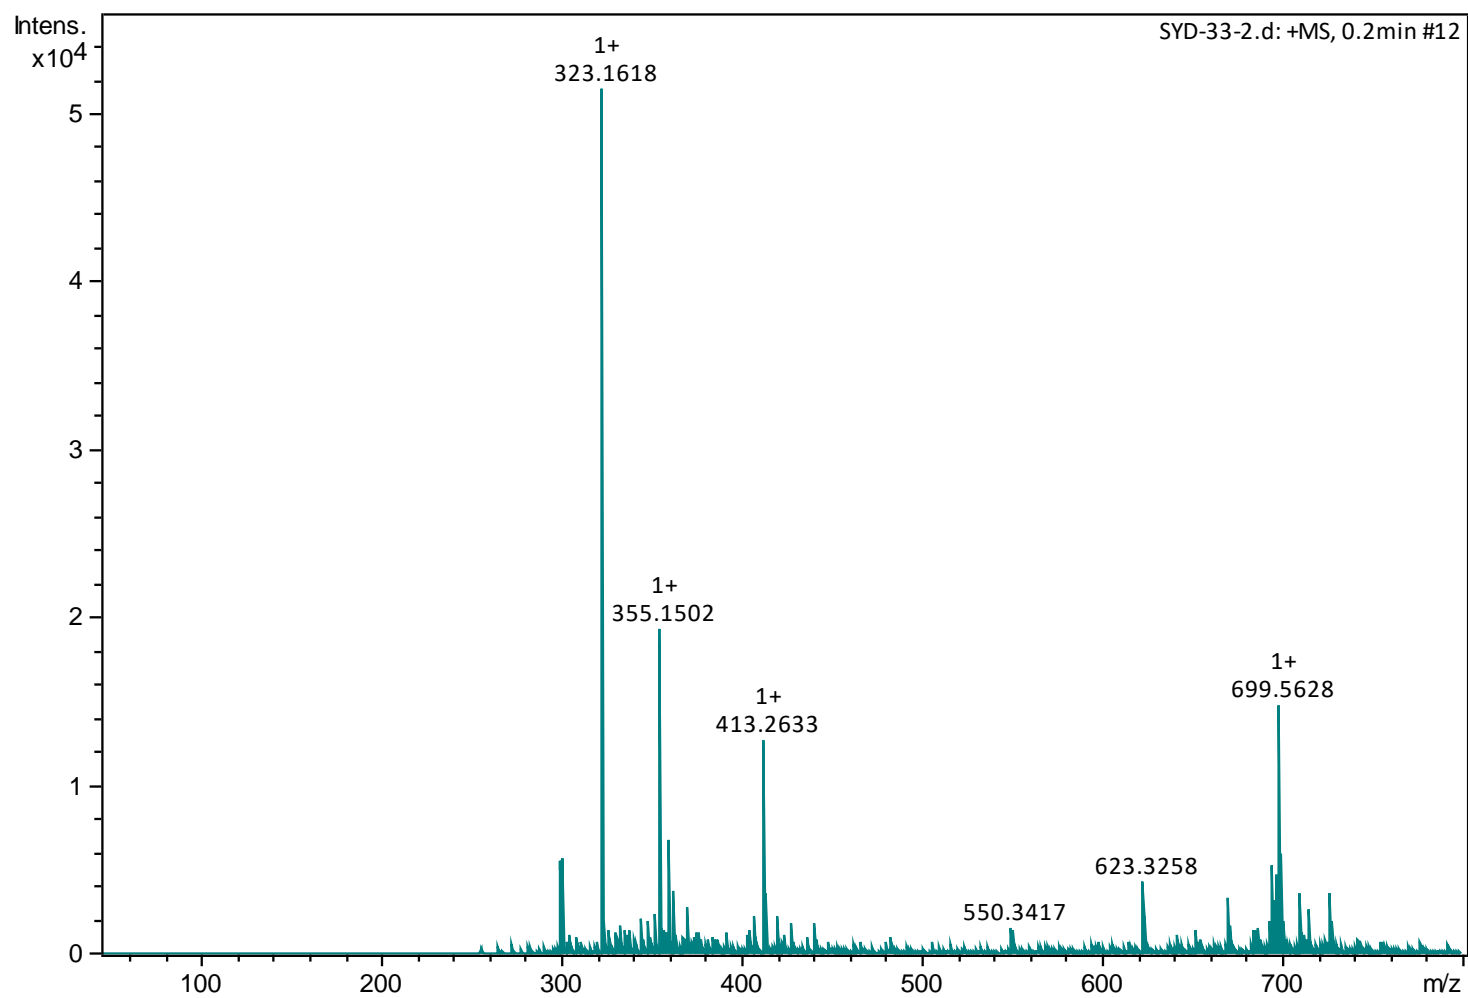

Fig. S56 HRTOFMS spectrum of compound 5.

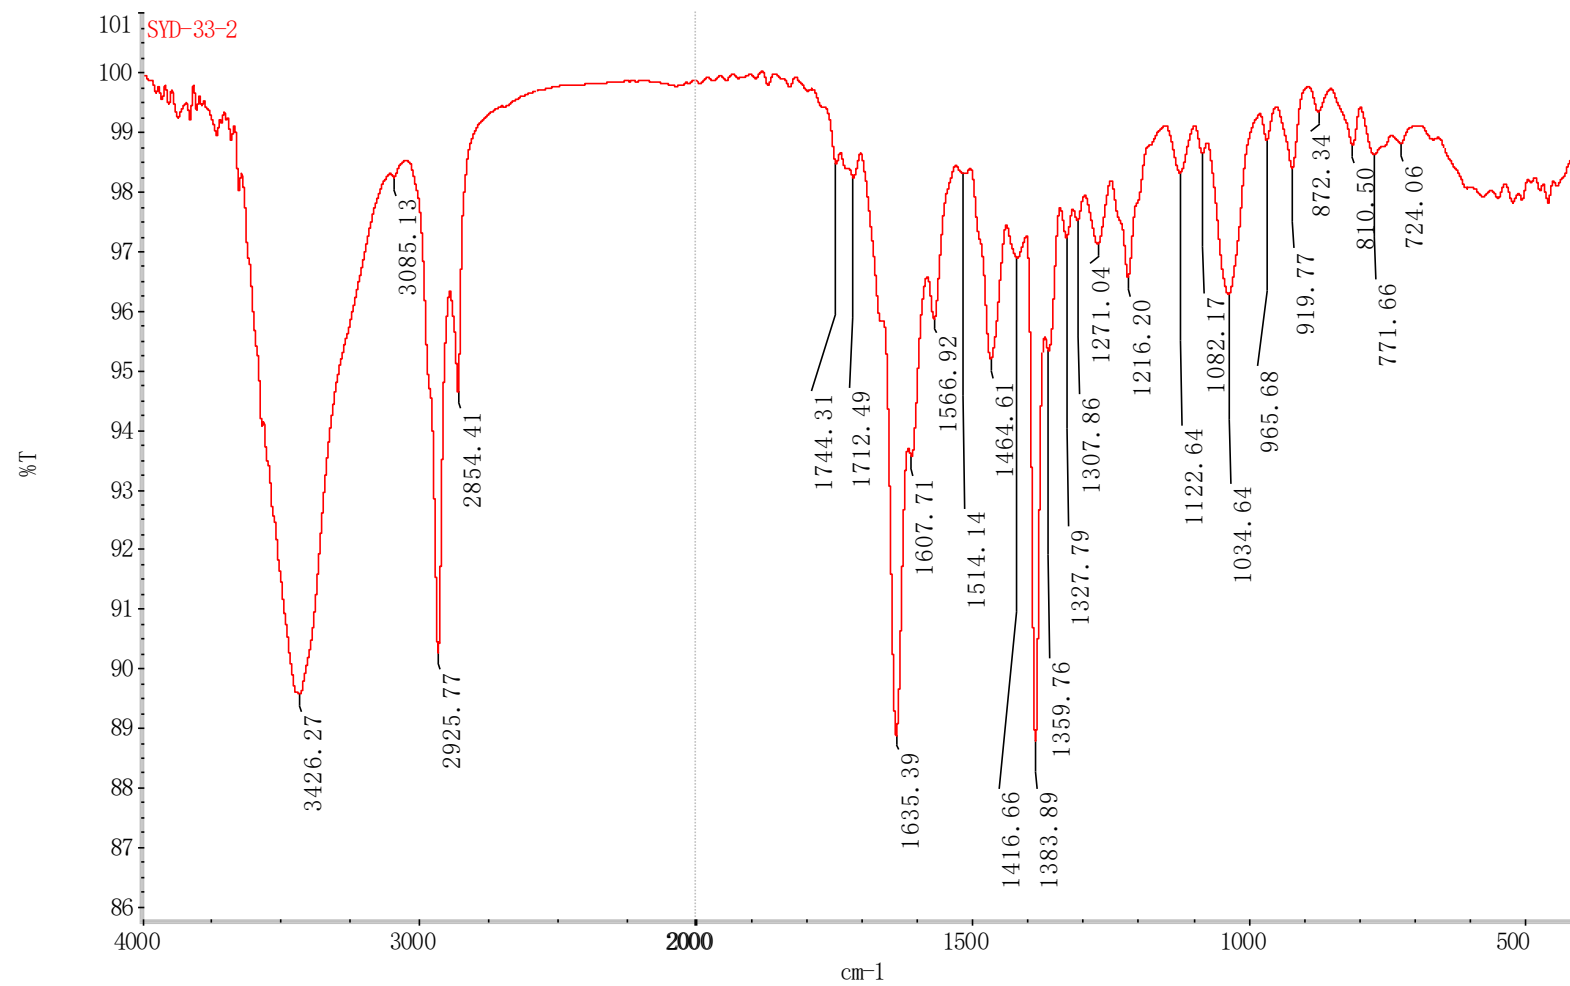

Fig. S57 IR spectrum of compound 5.

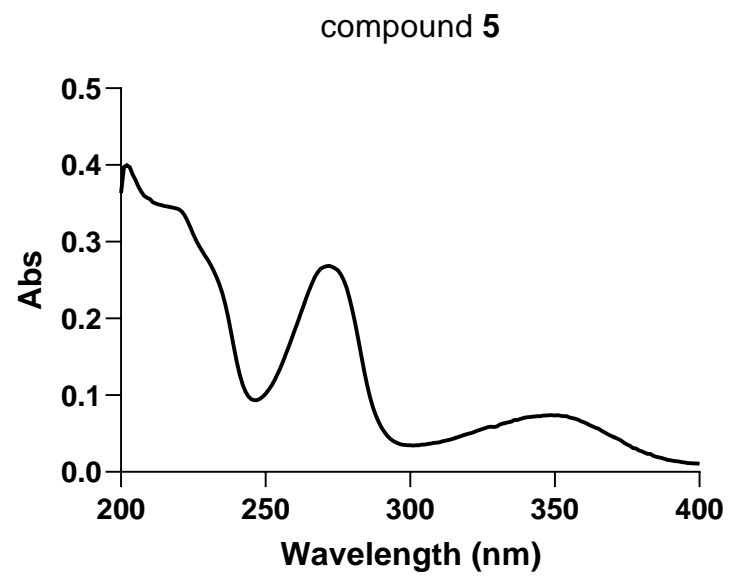

Fig. S58 UV spectrum of compound 5.

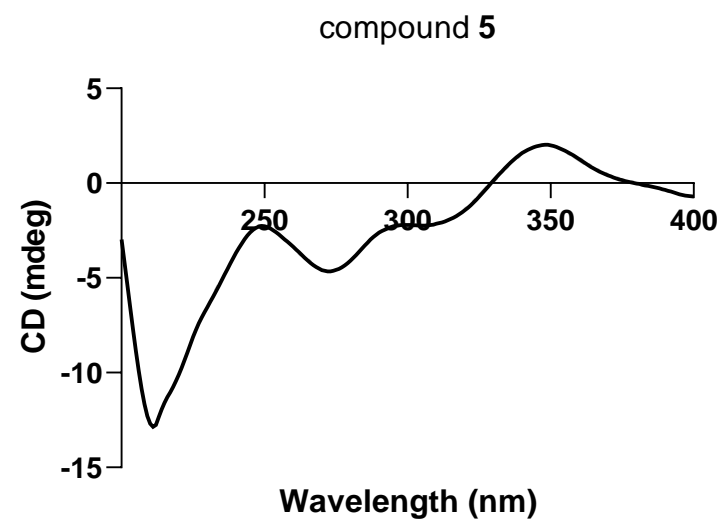

Fig. S59 CD spectrum of compound 5.
